# Supplementary material
Source: PubMed Central journal article supplement (PMC5460293)
Supplement: ol7b01215_si_001.pdf [file ol7b01215_si_001.pdf]

## *Supporting information*

# **Regio- and Stereoselective Radical Perfluoroalkyltriflation of Alkynes Using Phenyl(perfluoroalkyl)iodonium Triflates**

Xi Wang, and Armido Studer\*

*Institute of Organic Chemistry, University of Münster, Corrensstrasse 40, 48149  
Münster, Germany*

*E-mail: [studer@uni-muenster.de](mailto:studer@uni-muenster.de)*

## **Table of Contents**

|                                                                                                                          |     |
|--------------------------------------------------------------------------------------------------------------------------|-----|
| 1. General .....                                                                                                         | 2   |
| 2. Preparation of starting materials.....                                                                                | 2   |
| General procedure for the preparation of alkynes <b>1</b> from the corresponding aryl iodides or aryl bromides GP1 ..... | 4   |
| 3. General and selective perfluoroalkyltriflation of alkynes using aryl(perfluoroalkyl)iodonium triflates .....          | 5   |
| General procedure for perfluoroalkyltriflation of alkynes ( <b>GP2</b> ) .....                                           | 5   |
| Scale-up experiment .....                                                                                                | 6   |
| Screening of reaction conditions .....                                                                                   | 8   |
| 4. Derivatization of vinyl triflates.....                                                                                | 9   |
| 5. Synthesis of pentafluorinated Tamoxifen <b>8</b> .....                                                                | 11  |
| 6. Spectral data .....                                                                                                   | 13  |
| Spectral data of alkynes <b>1</b> .....                                                                                  | 13  |
| Spectral data of perfluoroalkyltriflation products <b>3</b> .....                                                        | 18  |
| Spectral data of follow-up products <b>4, 5, 6, 7</b> .....                                                              | 38  |
| Spectral data of pentafluorinated Tamoxifen <b>8</b> .....                                                               | 40  |
| 7. Spectra .....                                                                                                         | 42  |
| Spectra of alkynes <b>1</b> .....                                                                                        | 42  |
| Spectral data of perfluoroalkyltriflation products <b>3</b> .....                                                        | 51  |
| Spectral data of follow-up chemistry products <b>4, 5, 6, 7</b> .....                                                    | 112 |
| Spectra data of pentafluorinated Tamoxifen <b>8</b> .....                                                                | 120 |
| 8. References .....                                                                                                      | 122 |

## 1. General

All reactions involving air- or moisture-sensitive reagents or intermediates were carried out in pre-heated glassware under an argon atmosphere using standard *Schlenk* techniques. THF was freshly distilled from K under argon. All other solvents and reagents were purified according to standard procedures or were used as received from Alfa Aesar, TCI, Aldrich, Fluka, Acros or ABCR. The alkynes were synthesized according to literature procedures. IR spectra were recorded on a *Digilab FTS 4000* with a *Specac MKII Golden Gate Single Reflexion ART System*.  $^1\text{H}$  NMR and  $^{13}\text{C}$  NMR spectra were recorded on a *DPX 300*, *AV 400* or *DD2 600* at 300 K. Spectra were calibrated relative to solvent's residual proton and carbon chemical shift:  $\text{CHCl}_3$  ( $\delta = 7.26$  for  $^1\text{H}$  NMR and  $\delta = 77.0$  for  $^{13}\text{C}$  NMR). TLC was performed using Merck silica gel 60 F-254 plates, detection of compounds with UV light or dipping into a solution of  $\text{KMnO}_4$  (1.5 g in 400 mL  $\text{H}_2\text{O}$ , 5 g  $\text{NaHCO}_3$ ), followed by heating. Flash column chromatography (FC) was performed using Merck or Fluka silica gel 60 (40-63  $\mu\text{m}$ ) applying a pressure of about 0.2 bar. Mass spectra were recorded on a *Finnigan MAT 4200S*, a *Bruker Daltonics Micro Tof*, a *Waters-Micromass Quattro LCZ* (ESI); peaks are given in  $m/z$  (% of basis peak).

## 2. Preparation of starting materials

Phenyl(perfluoroalkyl)iodonium triflates **2a**, **2c**, **2d** are commercially available from TCI and were used as received. **2b**, **2e** were prepared according to the previously reported literature procedure.<sup>[1]</sup>

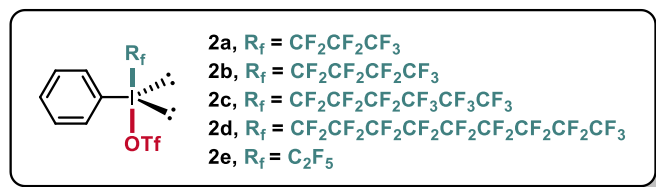

Alkynes **1f**, **1q**, **1aa**, **1ad**, **1ag** are commercially available from Alfa Aesar and alkyne **1af** is commercially available from ABCR. All commercially available alkynes were used as received. Alkynes **1a**,<sup>[2]</sup> **1b**,<sup>[3]</sup> **1c**,<sup>[4]</sup> **1g**,<sup>[5]</sup> **1h**,<sup>[5]</sup> **1k**,<sup>[5]</sup> **1l**,<sup>[5]</sup> **1m**,<sup>[5]</sup> **1r**,<sup>[6]</sup> **1s**,<sup>[7]</sup> **1t**,<sup>[8]</sup> **1u**,<sup>[9]</sup> **1w**,<sup>[10]</sup> **1ac**,<sup>[11]</sup> **1ae**,<sup>[12]</sup> **1af**,<sup>[13]</sup> were prepared according to previously reported literature procedures. Alkynes **1d**, **1e**, **1i**, **1j**, **1n**, **1o**, **1p**, **1v**, **1ab**, were prepared according to the following procedure.

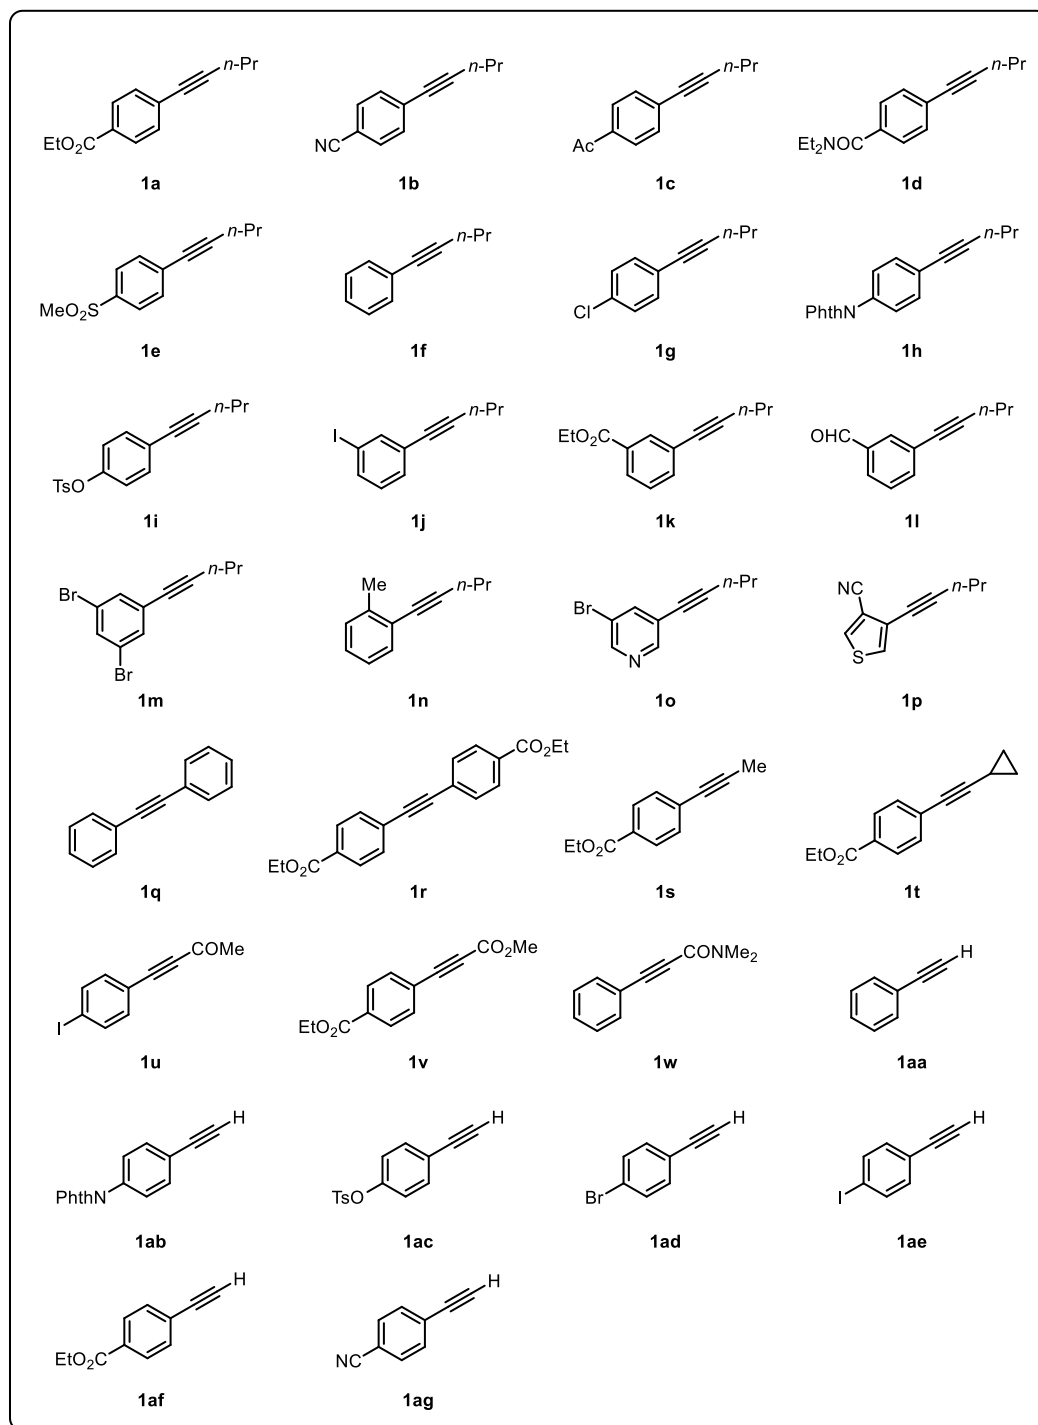

**General procedure for the preparation of alkynes 1 from the corresponding aryl iodides or aryl bromides GP1**

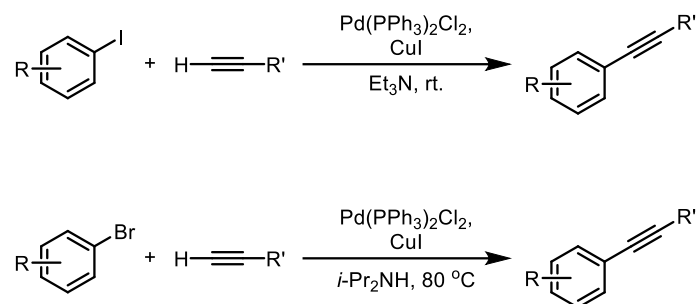

A flame-dried Schlenk-flask equipped with a magnetic stir bar was charged with bis(triphenylphosphine)palladium(II) dichloride, copper(I) iodide, aryl iodide or aryl bromide, sealed with a septum, and degassed by alternating vacuum evacuation and argon backfilling (three times) before triethylamine or diisopropylamine was added. The corresponding terminal alkyne was added to the resulting suspension subsequently. The reaction mixture was then stirred at room temperature or 80 °C for 12 hours. After the reaction was completed, the reaction mixture was diluted with Et<sub>2</sub>O (30 mL) and filtered through a small pad of silica gel. The solvent was removed under reduced pressure with the aid of a rotary evaporator and the crude residue was purified by silica gel column chromatography to give the corresponding pure alkynes **1**.

**Procedure for the preparation of alkyne 1i**

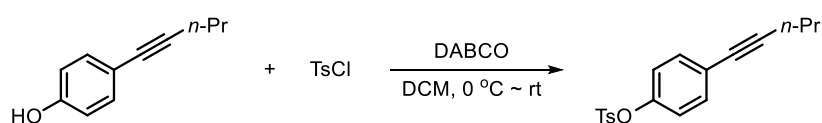

A flame-dried Schlenk-flask equipped with a magnetic stir bar was charged with 4-(pent-1-yn-1-yl)phenol (0.787 g, 4.91 mmol, 1.0 equiv),<sup>[5]</sup> DABCO (0.771 g, 6.87 mmol, 1.4 equiv) in DCM (20 mL). 4-Methylbenzenesulfonyl chloride (1.12 g, 5.89 mmol, 1.2 equiv) in DCM (10 mL) was slowly added to the resulting solution at 0 °C. After addition was completed, the reaction was allowed to warm up to room temperature and stirring was continued for additional 12 h. After the reaction was completed, the reaction mixture was diluted with EtOAc (30 mL) and filtered through a small pad of silica gel. The solvent was removed under reduced pressure with the aid

of a rotary evaporator and the crude residue was purified by silica gel column chromatography (pentane:EtOAc = 80:1) to give pure **1i** as a white solid in 86% yield (1.32 g).

### Procedure for the preparation of alkyne **1ab**

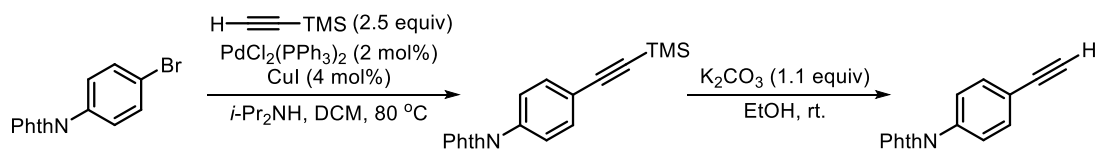

2-(4-((Trimethylsilyl)ethynyl)phenyl)isoindoline-1,3-dione was prepared according to general procedure GP1 with  $\text{Pd}(\text{PPh}_3)_2\text{Cl}_2$  (84.0 mg, 0.120 mmol, 2.0 mol%), CuI (46.0 mg, 0.240 mmol, 4.0 mol%), 2-(4-bromophenyl)isoindoline-1,3-dione (1.81 g, 6.00 mmol, 1.0 equiv), and ethynyltrimethylsilane (1.47 g, 15.0 mmol, 2.5 equiv) in *i*-Pr<sub>2</sub>NH (20 mL) and DCM (10 mL) at 80 °C for 12 hours. Purification via silica gel chromatography (pentane:EtOAc = 60:1, then 30:1) gave the desired product as a white solid in 95% yield (1.82 g). TLC  $R_f$  = 0.3 (pentane:EtOAc = 10:1). To a solution of 2-(4-((trimethylsilyl)ethynyl)phenyl)isoindoline-1,3-dione (1.00 g, 3.13 mmol, 1.0 equiv) in ethanol (20 mL) was added potassium carbonate (0.475 g, 3.45 mmol, 1.1 equiv) at room temperature. After 12 h, water was added and the aqueous phase was extracted with Et<sub>2</sub>O. The combined organic phases were washed with brine, dried over Na<sub>2</sub>SO<sub>4</sub>, filtered, and concentrated under vacuum. The crude residue was purified by silica gel column chromatography (pentane:EtOAc = 25:1, then 15:1) to afford the desired product **1ab** as a white solid in 88% yield (0.681 g).

### 3. General and selective perfluoroalkyltriflation of alkynes using aryl(perfluoroalkyl)iodonium triflates

#### General procedure for perfluoroalkyltriflation of alkynes (GP2)

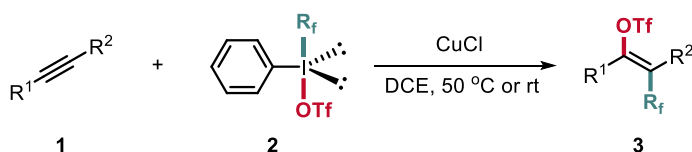

A flame-dried Schlenk-tube equipped with a magnetic stir bar was charged with copper(I) chloride (1.0 mg, 10  $\mu$ mol, 10 mol%), sealed with a septum, and degassed by alternating vacuum evacuation and argon backfilling (three times) before DCE (1 mL) was added. The corresponding alkyne **1** and phenyl(perfluoropropyl)iodonium triflate **2a** were added successively under a flow of argon. The reaction mixture was then stirred at 50 °C for 15 h or at room temperature for 24 h. After the reaction was completed, the solvent was removed under reduced pressure with the aid of a rotary evaporator. The crude residue was purified by silica gel column chromatography to afford pure perfluoroalkyltriflated product **3**.

### Scale-up experiment

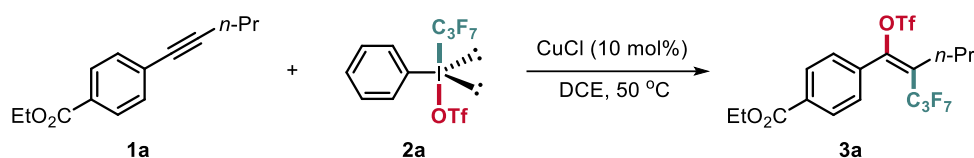

A flame-dried Schlenk-tube equipped with a magnetic stir bar was charged with copper(I) chloride (58.7 mg, 0.600 mmol, 10 mol%), sealed with a septum, and degassed by alternating vacuum evacuation and argon backfilling (three times) before DCE (40 mL) was added. Ethyl 4-(pent-1-yn-1-yl)benzoate **1a** (1.30 g, 6.00 mmol, 1.0 equiv) and phenyl(perfluoropropyl)iodonium triflate **2a** (5.33 g, 10.2 mmol, 1.7 equiv) were added successively under a flow of argon. The reaction mixture was then stirred at 50 °C for 30 h. After the reaction was completed, the reaction mixture was diluted with Et<sub>2</sub>O (40 mL) and filtered through a small pad of silica gel. The solvent was removed under reduced pressure with the aid of a rotary evaporator and the crude residue was purified by silica gel column chromatography (pentane:EtOAc = 200:1) to afford pure ethyl (E)-4-(3,3,4,4,5,5,5-heptafluoro-2-propyl-1-(((trifluoromethyl)sulfonyl)oxy)pent-1-en-1-yl)benzoate **3a** as a slight yellow oil in 93% yield (2.97 g).

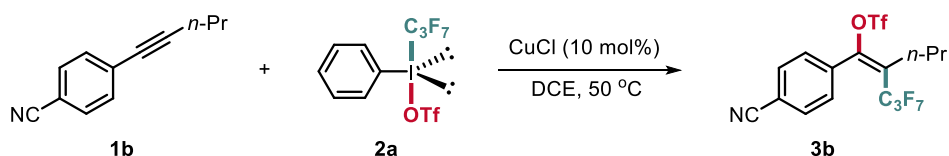

A flame-dried Schlenk-tube equipped with a magnetic stir bar was charged with copper(I) chloride (19.6 mg, 0.200 mmol, 10 mol%), sealed with a septum, and degassed by alternating vacuum evacuation and argon backfilling (three times) before DCE (20 mL) was added. 4-(Pent-1-yn-1-yl)benzonitrile **1b** (0.338 g, 2.00 mmol, 1.0 equiv) and phenyl(perfluoropropyl)iodonium triflate **2a** (1.78 g, 3.40 mmol, 1.7 equiv) were added successively under a flow of argon. The reaction mixture was then stirred at 50 °C for 30 h. After the reaction was completed, the reaction mixture was diluted with Et<sub>2</sub>O (20 mL) and filtered through a small pad of silica gel. The solvent was removed under reduced pressure with the aid of a rotary evaporator and the crude residue was purified by silica gel column chromatography (pentane:EtOAc = 200:1) to afford pure ethyl (*E*)-1-(4-cyanophenyl)-3,3,4,4,5,5,5-heptafluoro-2-propylpent-1-en-1-yl trifluoromethanesulfonate **3b** as a slight yellow oil in 50% yield (1.71 g).

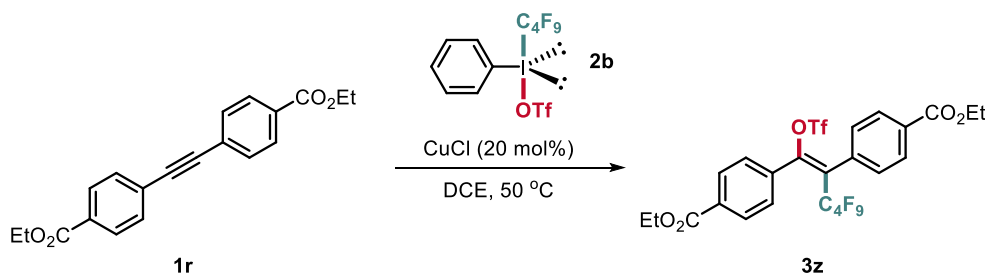

A flame-dried Schlenk-tube equipped with a magnetic stir bar was charged with copper(I) chloride (49.0 mg, 0.500 mmol, 10 mol%), sealed with a septum, and degassed by alternating vacuum evacuation and argon backfilling (three times) before DCE (50 mL) was added. Diethyl 4,4'-(ethyne-1,2-diyl)dibenzoate **1r** (1.61 g, 5.00 mmol, 1.0 equiv) and phenyl(perfluoropropyl)iodonium triflate **2a** (4.86 g, 8.5 mmol, 1.7 equiv) were added successively under a flow of argon. The reaction mixture was then stirred at 50 °C for 15 h. Then further portions of copper(I) chloride (49.0 mg, 0.500 mmol, 10 mol%), and phenyl(perfluoropropyl)iodonium triflate **2a** (4.86 g, 8.5 mmol, 1.7 equiv) were added. The stirring was continued at 50 °C for further 15 h. After the reaction was completed, the reaction mixture was diluted with Et<sub>2</sub>O (50 mL) and filtered through a small pad of silica gel. The solvent was removed under reduced

pressure with the aid of a rotary evaporator and the crude residue was purified by silica gel column chromatography (pentane:EtOAc = 200:1, then 150:1) to afford pure Diethyl 4,4'-(3,3,4,4,5,5,6,6,6-nonafluoro-1-(((trifluoromethyl)sulfonyl)oxy)hex-1-ene-1,2-diyl)(*E*)-dibenzoate **3z** as an off-white solid in 50% yield (0.79 g).

### Screening of reaction conditions

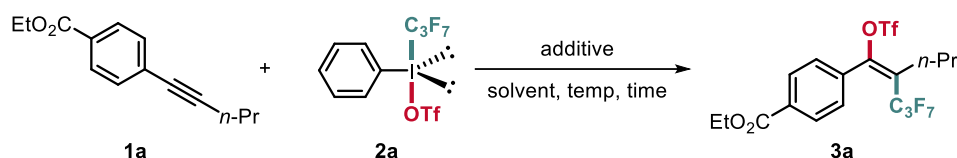

| entry <sup>a</sup> | additive                                       | <b>2a</b> (equiv) | solvent           | temp         | time (h)  | yield (%) <sup>b</sup>     |
|--------------------|------------------------------------------------|-------------------|-------------------|--------------|-----------|----------------------------|
| 1                  | none                                           | 1.0               | MeOH              | rt           | 4         | 0                          |
| 2                  | none                                           | 1.0               | Et <sub>2</sub> O | rt           | 4         | 0                          |
| 3                  | none                                           | 1.0               | MeCN              | rt           | 4         | 11                         |
| 4                  | none                                           | 1.0               | DCM               | rt           | 4         | 40                         |
| 5                  | none                                           | 1.0               | CHCl <sub>3</sub> | rt           | 4         | 25                         |
| 6                  | none                                           | 1.0               | DCE               | rt           | 4         | 49                         |
| 7                  | none                                           | 1.0               | DCE               | rt           | 15        | 53                         |
| 8                  | none                                           | 1.7               | DCE               | rt           | 15        | 69                         |
| 9                  | pyridine (1.7 equiv)                           | 1.7               | DCE               | rt           | 15        | 86                         |
| 10                 | K <sub>2</sub> CO <sub>3</sub> (1.7 equiv)     | 1.7               | DCE               | rt           | 15        | 78                         |
| 11                 | BF <sub>3</sub> ·Et <sub>2</sub> O (1.7 equiv) | 1.7               | DCE               | rt           | 15        | 75                         |
| 12                 | TfOH (1.7 equiv)                               | 1.7               | DCE               | rt           | 15        | 53                         |
| 13                 | TBAI (10 mol%)                                 | 1.7               | DCE               | rt           | 15        | 86                         |
| 14                 | CuCl (10 mol%)                                 | 1.7               | DCE               | rt           | 15        | 91                         |
| <b>15</b>          | <b>CuCl (10 mol%)</b>                          | <b>1.7</b>        | <b>DCE</b>        | <b>50 °C</b> | <b>15</b> | <b>96 (94)<sup>c</sup></b> |

<sup>a</sup>Reaction condition: **1a** (0.10 mmol, 1.0 equiv), reagent **2a**, additive, solvent (1 mL), room temperature. <sup>b</sup>Yield determined by <sup>19</sup>F NMR analysis using PhCF<sub>3</sub> as an internal standard; isomer ratio determined by <sup>19</sup>F NMR and GC-MS analysis on the crude product, *E/Z* > 20:1; <sup>c</sup>Isolated yield.

A flame-dried Schlenk-tube equipped with a magnetic stir bar was charged with copper(I) chloride (1.0 mg, 10 μmol, 10 mol%), sealed with a septum, and degassed by alternating vacuum evacuation and argon backfilling (three times) before DCE (50 mL) was added. Ethyl 4-(pent-1-yn-1-yl)benzoate **1a** (21.6 mg, 0.100 mmol, 1.0 equiv) and phenyl(perfluoropropyl)iodonium triflate **2a** were added successively under a flow of argon. The reaction mixture was then stirred at the given temperature for a certain period. After the reaction was completed, the solvent was removed under reduced

pressure with the aid of a rotary evaporator. The crude residue was analyzed by GC-MS and  $^{19}\text{F}$  NMR with  $\alpha,\alpha,\alpha$ -trifluorotoluene as the internal standard. All other screening experiments were conducted in analogy.

#### 4. Derivatization of vinyl triflates

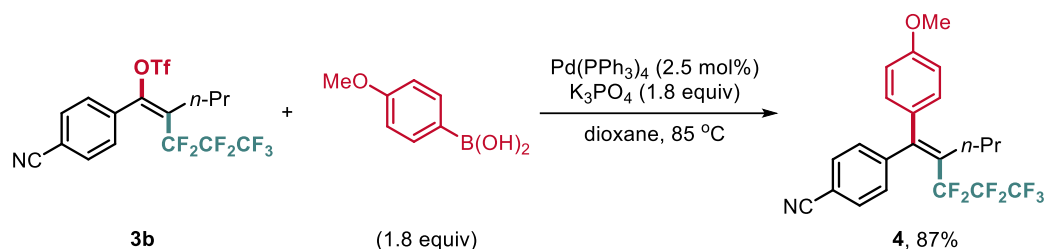

A flame-dried Schlenk-flask equipped with a magnetic stir bar was charged with tetrakis(triphenylphosphine)palladium(0) (5.8 mg, 5.0  $\mu\text{mol}$ , 2.5 mol%), (4-methoxyphenyl)boronic acid (54.7 mg, 0.360 mmol, 1.8 equiv), tripotassium phosphate (76.4 mg, 0.360 mmol, 1.8 equiv), sealed with a septum, and degassed by alternating vacuum evacuation and argon backfilling (three times) before dioxane (2 mL) was added. (*E*)-1-(4-Cyanophenyl)-3,3,4,4,5,5,5-heptafluoro-2-propylpent-1-en-1-yl trifluoromethanesulfonate **3b** (97.4 mg, 0.200 mmol, 1.0 equiv, dr > 20:1) was added to the resulting suspension subsequently. The reaction mixture was stirred at 85 °C for 24 hours. After the reaction was completed, the reaction mixture was diluted with  $\text{Et}_2\text{O}$  (10 mL) and filtered through a small pad of silica gel. The solvent was removed under reduced pressure with the aid of a rotary evaporator and the crude residue was purified by silica gel column chromatography (pentane: $\text{EtOAc}$  = 200:1, then 150:1) to give pure product **4** as a slight yellow oil in 87% yield (77.4 mg, dr = 20:1).

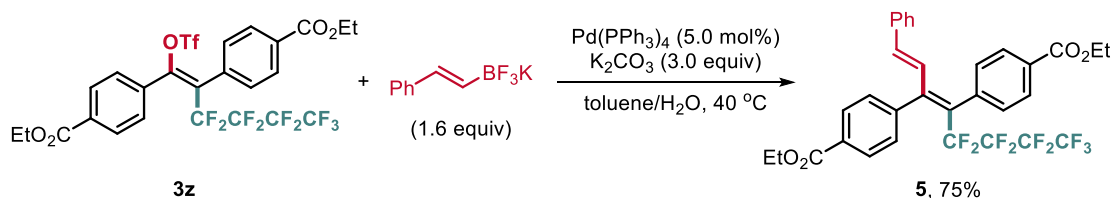

A flame-dried Schlenk-flask equipped with a magnetic stir bar was charged with tetrakis(triphenylphosphine)palladium(0) (5.8 mg, 5.0  $\mu\text{mol}$ , 5.0 mol%), potassium

*trans*-styryltrifluoroborate (33.6 mg, 0.16 mmol, 1.6 equiv), potassium carbonate (41.4 mg, 0.300 mmol, 3.0 equiv), sealed with a septum, and degassed by alternating vacuum evacuation and argon backfilling (three times) before toluene (2 mL) and H<sub>2</sub>O (0.4 mL) were added. Diethyl 4,4'-(3,3,4,4,5,5,6,6,6-nonafluoro-1-(((trifluoromethyl)sulfonyl)oxy)hex-1-ene-1,2-diyl)(*E*)-dibenzoate **3z** (69.0 mg, 0.100 mmol, 1.0 equiv, dr > 20:1) was added to the resulting suspension subsequently. The reaction mixture was stirred at 40 °C for 24 hours. After the reaction was completed, the reaction mixture was diluted with Et<sub>2</sub>O (10 mL) and filtered through a small pad of silica gel. The solvent was removed under reduced pressure with the aid of a rotary evaporator and the crude residue was purified by a PTLC (pentane:EtOAc = 20:1) to give pure product **5** as a white solid in 75% yield (48.0 mg, dr > 20:1).

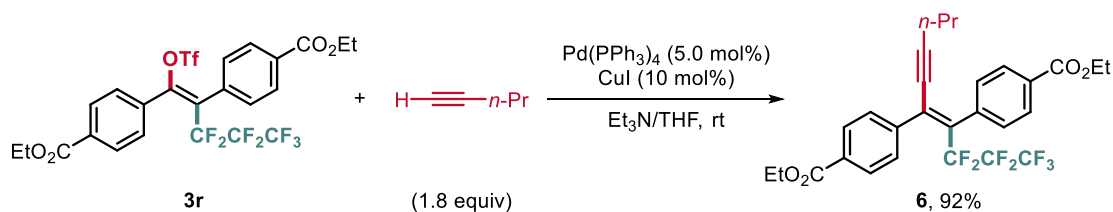

A flame-dried Schlenk-flask equipped with a magnetic stir bar was charged with tetrakis(triphenylphosphine)palladium(0) (5.8 mg, 5.0 μmol, 5.0 mol%), copper(I) iodide (1.8 mg, 10 μmol, 10 mol%), sealed with a septum, and degassed by alternating vacuum evacuation and argon backfilling (three times) before tetrahydrofuran (1 mL) and triethylamine (1 mL) were added. Diethyl 4,4'-(3,3,4,4,5,5,5-heptafluoro-1-(((trifluoromethyl)sulfonyl)oxy)pent-1-ene-1,2-diyl)(*E*)-dibenzoate **3r** (64.0 mg, 0.100 mmol, 1.0 equiv, dr > 20:1) and pent-1-yne (12.3 mg, 0.180 mmol, 1.8 equiv) was added to the resulting suspension successively. The reaction mixture was stirred at room temperature for 48 hours. After the reaction was completed, the reaction mixture was diluted with Et<sub>2</sub>O (10 mL) and filtered through a small pad of silica gel. The solvent was removed under reduced pressure with the aid of a rotary evaporator and the crude residue was purified by silica gel column chromatography (pentane:EtOAc = 200:1) to give pure product **6** as a pale yellow solid in 92% yield (51.1 mg, dr > 20:1).

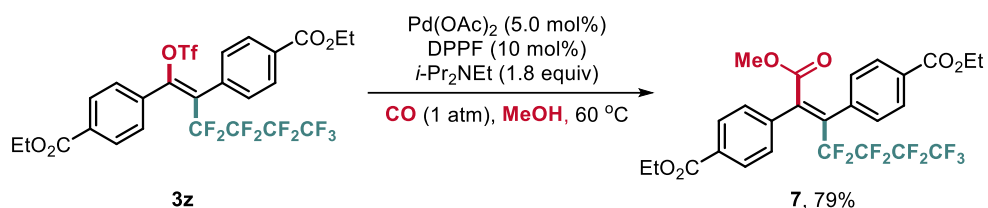

A flame-dried Schlenk-flask equipped with a magnetic stir bar was charged with palladium(II) acetate (1.1 mg, 5.0  $\mu\text{mol}$ , 5.0 mol%), DPPF (5.5 mg, 10  $\mu\text{mol}$ , 10 mol%), sealed with a septum, and degassed by alternating vacuum evacuation and argon backfilling (three times) before methanol (1 mL) was added. *N,N*-diisopropylethylamine (23.3 mg, 0.180 mmol, 1.8 equiv) and diethyl 4,4'-(3,3,4,4,5,5,6,6,6-nonafluoro-1-(((trifluoromethyl)sulfonyl)oxy)hex-1-ene-1,2-diyl)(*E*)-dibenzoate **3z** (69.0 mg, 0.100 mmol, 1.0 equiv, dr > 20:1) were then added successively. The flask was fitted with a balloon of carbon monoxide gas and partially evacuated followed by purging with carbon monoxide. This process was repeated three times. The reaction mixture was stirred at 60  $^\circ\text{C}$  for 24 hours. After the reaction was completed, the reaction mixture was diluted with Et<sub>2</sub>O (10 mL) and filtered through a small pad of silica gel. The solvent was removed under reduced pressure with the aid of a rotary evaporator and the crude residue was purified by a PTLC (pentane:EtOAc = 10:1) to give pure product **7** as a white solid in 79% yield (47.4 mg, dr > 20:1).

## 5. Synthesis of pentafluorinated Tamoxifen **8**

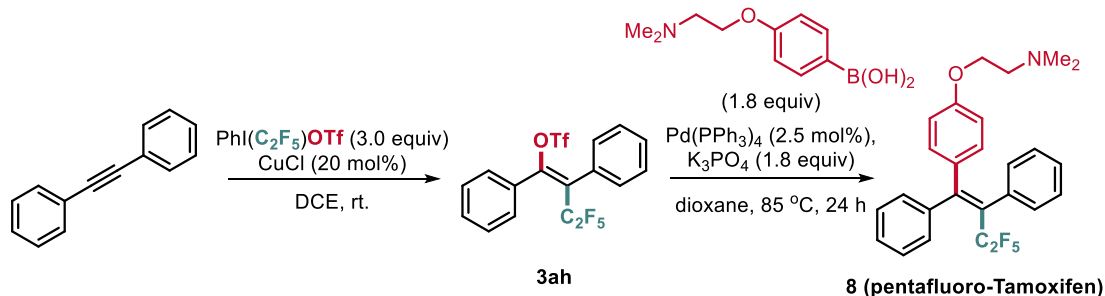

A flame-dried Schlenk-tube equipped with a magnetic stir bar was charged with copper(I) chloride (4.9 mg, 0.50 mmol, 10 mol%), sealed with a septum, and degassed by alternating vacuum evacuation and argon backfilling (three times) before DCE (5 mL) was added. 1,2-Diphenylethyne **1q** (89.0 mg, 0.500 mmol, 1.0 equiv) and

phenyl(pentafluoroethyl)iodonium triflate **2e** (353.9 mg, 750.0  $\mu\text{mol}$ , 1.5 equiv) were added successively under a flow of argon. The reaction mixture was then stirred at room temperature for 24 h. Then further portions of copper(I) chloride (4.9 mg, 0.50 mmol, 10 mol%), phenyl(pentafluoroethyl)iodonium triflate **2e** (353.9 mg, 750.0  $\mu\text{mol}$ , 1.5 equiv), DCE (5 mL) were added. The stirring was continued at room temperature for further 24 h. After the reaction was completed, the solvent was removed under reduced pressure with the aid of a rotary evaporator and the crude residue was purified by silica gel column chromatography (pentane) to remove iodobenzene and iodine(III) compound to afford crude pentafluoroethyltriflated product, which was used in the next step. Another flame-dried Schlenk-flask equipped with a magnetic stir bar was charged with tetrakis(triphenylphosphine)palladium(0) (14.4 mg, 12.5 mmol, 2.5 mol%), (4-(2-(dimethylamino)ethoxy)phenyl)boronic acid (188.2 mg, 900.0  $\mu\text{mol}$ , 1.8 equiv),<sup>[14]</sup> tripotassium phosphate (190.7 mg, 900.0  $\mu\text{mol}$ , 1.8 equiv), sealed with a septum, and degassed by alternating vacuum evacuation and argon backfilling (three times) before dioxane (5 mL) was added. The resulting crude pentafluoroethyltriflated product was added to the resulting suspension subsequently. The reaction mixture was stirred at 85 °C for 24 hours. After the reaction was completed, the reaction mixture was diluted with Et<sub>2</sub>O (25 mL) and filtered through a small pad of silica gel. The solvent was removed under reduced pressure with the aid of a rotary evaporator and the crude residue was purified by silica gel column chromatography (DCM:MeOH = 60:1, then 30:1) to give pentafluorinated Tamoxifen **8** as a slight yellow oil in 34% yield (77.4 mg, *E/Z* = 18:1). The NMR spectrum was obtained with further purification by GPC.

## 6. Spectral data

### Spectral data of alkynes 1

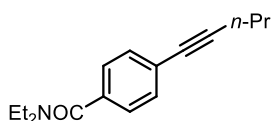

***N,N*-Diethyl-4-(pent-1-yn-1-yl)benzamide (1d):** The title compound was prepared according to general procedure GP1 with Pd(PPh<sub>3</sub>)<sub>2</sub>Cl<sub>2</sub> (110 mg, 0.157 mmol, 2.0 mol%), CuI (59.7 mg, 0.313 mmol, 4.0 mol%), 4-bromo-*N,N*-diethylbenzamide (2.00 g, 7.84 mmol, 1.0 equiv), and pent-1-yne (1.28 g, 18.8 mmol, 2.4 equiv) in *i*-Pr<sub>2</sub>NH (40 mL) at 80 °C for 24 hours. Purification via silica gel chromatography (pentane:EtOAc = 10:1) gave the desired product **1d** as a yellow oil in 86% yield (1.63 g). **TLC** *R<sub>f</sub>* = 0.30 (pentane:EtOAc = 4:1); **<sup>1</sup>H NMR** (300 MHz, CDCl<sub>3</sub>, 300 K): δ (ppm) = 7.34 (d, *J* = 8.1 Hz, 2H), 7.21 (d, *J* = 8.1 Hz, 2H), 3.45 (br, 2H), 3.18 (br, 2H), 2.32 (t, *J* = 7.0 Hz, 2H), 1.69 – 1.44 (tq, *J*<sup>1</sup> = 7.5 Hz, *J*<sup>2</sup> = 7.2 Hz, 2H), 1.34 – 0.87 (m, 6H), 0.98 (t, *J* = 7.4 Hz, 3H); **<sup>13</sup>C NMR** (75 MHz, CDCl<sub>3</sub>, 300 K): δ (ppm) = 170.59, 136.00, 131.33, 126.11, 124.92, 91.45, 80.04, 43.10 (br, C), 39.18 (br, C), 21.96, 21.23, 13.95, 13.35 (br, C), 12.79 (br, C); **HRMS** (ESI) *m/z* = 266.1515, calcd. for C<sub>16</sub>H<sub>21</sub>NONa [M+Na]<sup>+</sup>, found: 266.1525; **IR** (neat, cm<sup>-1</sup>): 2966*m*, 2934*w*, 2873*w*, 1627*s*, 1507*w*, 1457*m*, 1423*s*, 1380*m*, 1364*w*, 1315*m*, 1285*s*, 1220*w*, 1178*w*, 1093*s*, 1019*w*, 942*w*, 876*w*, 876*m*, 841*s*, 789*w*, 764*w*, 741*w*, 652*w*, 575*m*.

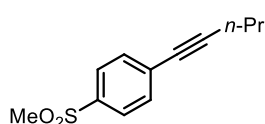

**1-(Methylsulfonyl)-4-(pent-1-yn-1-yl)benzene (1e):** The title compound was prepared according to general procedure GP1 with Pd(PPh<sub>3</sub>)<sub>2</sub>Cl<sub>2</sub> (56.2 mg, 80.0 μmol, 1.0 mol%), CuI (30.5 mg, 0.160 mmol, 2.0 mol%), 1-bromo-4-(methylsulfonyl)benzene (1.87 g, 8.00 mmol, 1.0 equiv), and pent-1-yne (0.763 g, 11.2 mmol, 1.4 equiv) in *i*-Pr<sub>2</sub>NH (20 mL) at 80 °C for 12 hours. Purification via silica gel chromatography (pentane:EtOAc = 20:1, then 15:1) gave the desired product **1e** as a gray solid in 94% yield (1.67 g). **TLC** *R<sub>f</sub>* = 0.25 (pentane:EtOAc = 7:1); **<sup>1</sup>H NMR** (300 MHz, CDCl<sub>3</sub>, 300 K): δ (ppm) = 7.78 (d, *J* = 8.5 Hz, 2H), 7.48 (d, *J* = 8.5 Hz, 2H), 2.97 (s, 3H), 2.35 (t, *J* = 7.0 Hz, 2H), 1.58 (tq, *J*<sup>1</sup> = 7.2 Hz, *J*<sup>2</sup> = 7.2 Hz, 2H), 0.99 (t, *J* = 7.4 Hz, 3H); **<sup>13</sup>C NMR** (75 MHz, CDCl<sub>3</sub>, 300 K): δ (ppm) = 138.96, 132.26, 130.13, 127.23, 95.14, 79.42, 44.49, 21.93, 21.45, 13.51;

**HRMS** (ESI)  $m/z$  = 245.0607, calcd. for  $C_{12}H_{14}O_2S$   $[M+Na]^+$ , found: 245.0612; **IR** (neat,  $cm^{-1}$ ): 3073w, 2961w, 2871w, 2223w, 1592m, 1560w, 1488w, 1466w, 1306s, 1278s, 1181w, 1143s, 1087s, 1039w, 1017w, 967s, 882s, 838s, 778s, 744w, 714w.

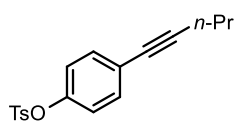

**4-(Pent-1-yn-1-yl)phenyl 4-methylbenzenesulfonate (1i):** The title compound was prepared according to procedure **1 (P1)**. **TLC**  $R_f$  = 0.30 (pentane:EtOAc = 20:1); **MP**: 34 °C;  **$^1H$  NMR** (300 MHz,  $CDCl_3$ , 300 K):  $\delta$  (ppm) =  $\delta$  7.60 (d,  $J$  = 8.4 Hz, 2H), 7.21 (dd,  $J^1$  = 8.5 Hz,  $J^2$  = 1.6 Hz, 4H), 6.81 (d,  $J$  = 8.7 Hz, 2H), 2.36 (s, 3H), 2.28 (t,  $J$  = 7.0 Hz, 2H), 1.53 (h,  $J$  = 7.3 Hz, 2H), 0.95 (t,  $J$  = 7.4 Hz, 3H);  **$^{13}C$  NMR** (75 MHz,  $CDCl_3$ , 300 K):  $\delta$  (ppm) = 148.67, 145.39, 132.73, 132.27, 129.73, 128.50, 123.20, 122.26, 91.46, 79.47, 22.06, 21.65, 21.30, 13.47; **HRMS** (ESI)  $m/z$  = 337.0869, calcd. for  $C_{18}H_{18}O_3SNa$   $[M+Na]^+$ , found: 337.0874; **IR** (neat,  $cm^{-1}$ ): 2963w, 2936w, 2973w, 2238w, 1598w, 1499s, 1463w, 1374s, 1295w, 1198s, 1175s, 1155s, 1093s, 1017w, 860s, 845s, 814m, 747m, 721w, 673m, 576s.

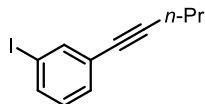

**1-Iodo-3-(pent-1-yn-1-yl)benzene (1j):** The title compound was prepared according to general procedure GP1 with  $Pd(PPh_3)_2Cl_2$  (70.2 mg, 0.100 mmol, 1.0 mol%), CuI (38.1 mg, 0.200 mmol, 2.0 mol%), 1,3-diiodobenzene (4.95 g, 15.0 mmol, 1.5 equiv), and pent-1-yne (0.681 g, 10.0 mmol, 1.0 equiv) in  $Et_3N$  (20 mL) at room temperature for 12 hours. Purification via silica gel chromatography (pentane) gave the desired product **1j** as a slight yellow oil in 75% yield (2.03 g). **TLC**  $R_f$  = 0.55 (pentane);  **$^1H$  NMR** (300 MHz,  $CDCl_3$ , 300 K):  $\delta$  (ppm) = 7.67 (t,  $J$  = 1.7 Hz, 1H), 7.50 (dt,  $J^1$  = 7.9 Hz,  $J^2$  = 1.4 Hz, 1H), 7.26 (dt,  $J^1$  = 7.7 Hz,  $J^2$  = 1.3 Hz, 1H), 6.91 (t,  $J$  = 7.8 Hz, 1H), 2.29 (t,  $J$  = 7.0 Hz, 2H), 1.54 (tq,  $J^1$  = 7.2 Hz,  $J^2$  = 7.2 Hz, 2H), 0.96 (t,  $J$  = 7.3 Hz, 3H);  **$^{13}C$  NMR** (75 MHz,  $CDCl_3$ , 300 K):  $\delta$  (ppm) = 140.18, 136.45, 130.62, 129.62, 126.18, 93.57, 91.83, 79.17, 22.06, 21.36, 13.51; **HRMS** (APCI)  $m/z$  = 270.99782, calcd. for  $C_{11}H_{12}I$   $[M+H]^+$ , found: 270.99756; **IR** (neat,  $cm^{-1}$ ): 2961w, 2932w, 2903w, 2871w, 2835w, 2237w, 1584s, 1549s, 1469s, 1428w, 1397w, 1379w, 1338w, 1299w, 1241w, 1168w, 1066w, 994m, 961s, 881m, 778s, 753w, 719m, 681s, 653w.

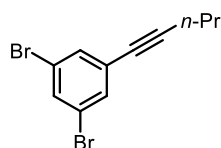

**1,3-Dibromo-5-(pent-1-yn-1-yl)benzene (1n):** The title

compound was prepared according to general procedure GP1 with

$\text{Pd(PPh}_3)_2\text{Cl}_2$  (56.2 mg, 80.0  $\mu\text{mol}$ , 1.0 mol%), CuI (30.5 mg,

0.160 mmol, 2.0 mol%), 1,3,5-tribromobenzene (3.78 g, 12.0 mmol, 1.5 equiv), and

pent-1-yne (0.545 g, 8.00 mmol, 1.0 equiv) in *i*-Pr<sub>2</sub>NH (16 mL) at 80 °C for 12 hours.

Purification via silica gel chromatography (pentane) gave the desired product **1n** as a

colorless oil in 67% yield (1.61 g). **TLC**  $R_f$  = 0.9 (pentane); **<sup>1</sup>H NMR** (300 MHz,

$\text{CDCl}_3$ , 300 K):  $\delta$  (ppm) = 7.59 (t,  $J$  = 1.8 Hz, 1H), 7.49 (d,  $J$  = 1.8 Hz, 2H), 2.40 (t,  $J$

= 7.0 Hz, 2H), 1.65 (tq,  $J^1$  = 7.2 Hz,  $J^2$  = 7.2 Hz, 2H), 1.07 (t,  $J$  = 7.4 Hz, 3H); **<sup>13</sup>C**

**NMR** (75 MHz,  $\text{CDCl}_3$ , 300 K):  $\delta$  (ppm) = 133.18, 133.04, 127.54, 122.42, 93.41,

78.14, 21.95, 21.33, 13.50; **HRMS** (APCI)  $m/z$  = 300.90563, calcd. for  $\text{C}_{11}\text{H}_9\text{Br}_2$  [ $\text{M}$ ]<sup>+</sup>,

found: 300.90451; **IR** (neat,  $\text{cm}^{-1}$ ): 2961<sub>w</sub>, 2933<sub>w</sub>, 2872<sub>w</sub>, 2833<sub>w</sub>, 2225<sub>w</sub>, 1580<sub>s</sub>,

1539<sub>s</sub>, 1463<sub>w</sub>, 1429<sub>w</sub>, 1401<sub>m</sub>, 1338<sub>w</sub>, 1250<sub>w</sub>, 1110<sub>w</sub>, 978<sub>w</sub>, 879<sub>w</sub>, 852<sub>s</sub>, 785<sub>w</sub>, 747<sub>s</sub>,

669<sub>s</sub>.

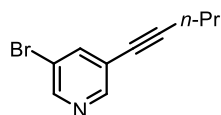

**3-Bromo-5-(pent-1-yn-1-yl)pyridine (1o):** The title compound

was prepared according to general procedure GP1 with

$\text{Pd(PPh}_3)_2\text{Cl}_2$  (84.2 mg, 0.120 mmol, 2.0 mol%), CuI (45.8 mg,

0.240 mmol, 4.0 mol%), 3,5-dibromopyridine (2.11 g, 9.00 mmol, 1.5 equiv), and pent-

1-yne (0.408 g, 6.00 mmol, 1.0 equiv) in *i*-Pr<sub>2</sub>NH (20 mL) at 80 °C for 12 hours.

Purification via silica gel chromatography gave the desired product **1o** as a colorless oil

in 76% yield (1.02 g). **TLC**  $R_f$  = 0.55 (pentane:EtOAc = 20:1); **<sup>1</sup>H NMR** (300 MHz,

$\text{CDCl}_3$ , 300 K):  $\delta$  (ppm) =  $\delta$  8.45 (d,  $J$  = 4.5 Hz, 2H), 7.73 (t,  $J$  = 1.9 Hz, 1H), 2.32 (t,

$J$  = 7.0 Hz, 2H), 1.55 (tq,  $J^1$  = 7.2 Hz,  $J^2$  = 7.2 Hz, 2H), 0.96 (t,  $J$  = 7.4 Hz, 3H); **<sup>13</sup>C**

**NMR** (75 MHz,  $\text{CDCl}_3$ , 300 K):  $\delta$  (ppm) = 150.25, 148.96, 140.66, 122.55, 119.86,

95.47, 76.17, 21.83, 21.33, 13.44; **HRMS** (ESI)  $m/z$  = 224.0069, calcd. for  $\text{C}_{10}\text{H}_{11}\text{BrN}$

[ $\text{M}+\text{H}$ ]<sup>+</sup>, found: 224.0066; **IR** (neat,  $\text{cm}^{-1}$ ): 3044<sub>w</sub>, 2963<sub>w</sub>, 2933<sub>w</sub>, 2872<sub>w</sub>, 2240<sub>w</sub>,

1574<sub>m</sub>, 1537<sub>w</sub>, 1429<sub>s</sub>, 1405<sub>s</sub>, 1380<sub>w</sub>, 1339<sub>w</sub>, 1308<sub>w</sub>, 1253<sub>w</sub>, 1210<sub>w</sub>, 1162<sub>w</sub>, 1094<sub>w</sub>,

1018<sub>s</sub>, 967<sub>w</sub>, 880<sub>s</sub>, 804<sub>w</sub>, 791<sub>w</sub>, 746<sub>w</sub>, 695<sub>s</sub>, 649<sub>w</sub>.

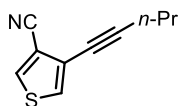

**4-(Pent-1-yn-1-yl)thiophene-3-carbonitrile (1p):** The title compound was prepared according to general procedure GP1 with Pd(PPh<sub>3</sub>)<sub>2</sub>Cl<sub>2</sub> (56.2 mg, 80.0 μmol, 2.0 mol%), CuI (30.5 mg, 0.160 mmol, 4.0 mol%), 4-bromothiophene-3-carbonitrile (0.752 g, 4.00 mmol, 1.0 equiv), and pent-1-yne (0.763 g, 11.2 mmol, 2.8 equiv) in *i*-Pr<sub>2</sub>NH (15 mL) at 80 °C for 12 hours. Purification via silica gel chromatography (pentane:EtOAc = 80:1) gave the desired product **1p** as a brown oil in 65% yield (0.458 g). **TLC** *R<sub>f</sub>* = 0.45 (pentane:EtOAc = 20:1); **<sup>1</sup>H NMR** (300 MHz, CDCl<sub>3</sub>, 300 K): δ (ppm) = 7.77 (d, *J* = 3.2 Hz, 1H), 7.30 (d, *J* = 3.2 Hz, 1H), 2.35 (t, *J* = 7.0 Hz, 2H), 1.58 (tq, *J*<sup>1</sup> = 7.2 Hz, *J*<sup>2</sup> = 7.2 Hz, 2H), 1.00 (t, *J* = 7.4 Hz, 3H); **<sup>13</sup>C NMR** (75 MHz, CDCl<sub>3</sub>, 300 K): δ (ppm) = 134.64, 128.11, 125.41, 114.16, 114.07, 94.95, 72.11, 21.88, 21.35, 13.45; **HRMS** (ESI) *m/z* = 198.0348, calcd. for C<sub>10</sub>H<sub>9</sub>NSNa [M+Na]<sup>+</sup>, found: 198.0347; **IR** (neat, cm<sup>-1</sup>): 3109*m*, 2963*s*, 2934*m*, 2906*w*, 2872*w*, 2832*w*, 2232*s*, 2163*w*, 1517*w*, 1449*w*, 1428*w*, 1381*w*, 1353*w*, 1338*w*, 1276*w*, 1206*w*, 1131*w*, 1091*w*, 1041*w*, 934*w*, 874*m*, 860*w*, 807*s*, 744*w*, 700*w*.

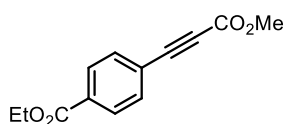

**Ethyl 4-(3-methoxy-3-oxoprop-1-yn-1-yl)benzoate (1v):** The title compound was prepared according to general procedure GP1 with Pd(PPh<sub>3</sub>)<sub>2</sub>Cl<sub>2</sub> (70.2 mg, 0.100 mmol, 2.0 mol%), CuI (38.2 mg, 0.200 mmol, 4.0 mol%), ethyl 4-iodobenzoate (2.07 g, 7.50 mmol, 1.5 equiv), potassium carbonate (2.07 g, 15.0 mmol, 3.0 equiv), and methyl propiolate (0.420 g, 5.00 mmol, 1.0 equiv) in THF (10 mL) at 65 °C for 12 hours. Purification via silica gel chromatography (pentane:EtOAc = 80:1) gave the desired product **1v** as a white solid in 65% yield (0.754 g). **TLC** *R<sub>f</sub>* = 0.45 (pentane:EtOAc = 0.45); **MP**: 79 °C; **<sup>1</sup>H NMR** (300 MHz, CDCl<sub>3</sub>, 300 K): δ (ppm) = 7.98 (d, *J* = 8.1 Hz, 2H), 7.57 (d, *J* = 8.1 Hz, 2H), 4.32 (q, *J* = 7.1 Hz, 2H), 3.79 (s, 3H), 1.33 (t, *J* = 7.1 Hz, 3H); **<sup>13</sup>C NMR** (75 MHz, CDCl<sub>3</sub>, 300 K): δ (ppm) = 165.54, 154.10, 132.76, 132.14, 129.58, 123.88, 85.04, 82.25, 61.41, 52.92, 14.26; **HRMS** (ESI) *m/z* = 255.0628, calcd. for C<sub>13</sub>H<sub>12</sub>O<sub>4</sub>Na [M+Na]<sup>+</sup>, found: 255.0634; **IR** (neat, cm<sup>-1</sup>): 2991*w*, 2230*m*, 1713*s*,

1607<sub>w</sub>, 1438<sub>m</sub>, 1404<sub>m</sub>, 1364<sub>w</sub>, 1292<sub>m</sub>, 1280<sub>s</sub>, 1210<sub>m</sub>, 1188<sub>m</sub>, 1126<sub>m</sub>, 1104<sub>m</sub>, 1018<sub>m</sub>, 988<sub>w</sub>, 886<sub>w</sub>, 855<sub>m</sub>, 765<sub>m</sub>, 744<sub>m</sub>, 691<sub>m</sub>.

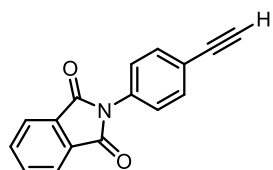

**2-(4-Ethynylphenyl)isoindoline-1,3-dione (1ab):** The title compound was prepared according to procedure **2 (P2)**. **TLC R<sub>f</sub>** = 0.25 (pentane:EtOAc = 7:1); **MP:** 159 °C; **<sup>1</sup>H NMR** (300 MHz, CDCl<sub>3</sub>, 300 K): δ (ppm) = 7.96 (dd,  $J^1 = 5.5$  Hz,  $J^2 = 3.1$  Hz, 2H), 7.80 (dd,  $J^1 = 5.5$  Hz,  $J^2 = 3.1$  Hz, 2H), 7.62 (d,  $J = 8.5$  Hz, 2H), 7.46 (d,  $J = 8.5$  Hz, 2H), 3.13 (s, 1H); **<sup>13</sup>C NMR** (75 MHz, CDCl<sub>3</sub>, 300 K): δ (ppm) = 166.90, 134.53, 132.81, 132.08, 131.67, 126.15, 123.84, 121.83, 82.89, 78.09; **HRMS** (ESI)  $m/z$  = 270.0525, calcd. for C<sub>16</sub>H<sub>9</sub>NO<sub>2</sub>Na [M+Na]<sup>+</sup>, found: 270.0530; **IR** (neat, cm<sup>-1</sup>): 3255<sub>m</sub>, 3098<sub>w</sub>, 3031<sub>w</sub>, 2363<sub>w</sub>, 1742<sub>w</sub>, 1703<sub>s</sub>, 1511<sub>w</sub>, 1469<sub>w</sub>, 1389<sub>m</sub>, 1225<sub>w</sub>, 1175<sub>w</sub>, 1110<sub>w</sub>, 1087<sub>w</sub>, 884<sub>m</sub>, 834<sub>m</sub>, 795<sub>w</sub>, 718<sub>s</sub>, 684<sub>w</sub>, 641<sub>w</sub>.

### Spectral data of perfluoroalkyltriflation products 3

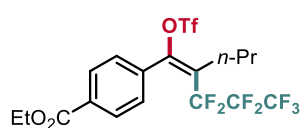

**Ethyl (E)-4-(3,3,4,4,5,5,5-heptafluoro-2-propyl-1-((trifluoromethyl)sulfonyl)oxy)pent-1-en-1-yl)benzoate (3a):** The

title compound was prepared according to general procedure GP2 with CuCl (1.0 mg, 10  $\mu$ mol, 10 mol%), ethyl 4-(pent-1-yn-1-yl)benzoate **1a** (21.6 mg, 0.100 mmol, 1.0 equiv), and phenyl(perfluoropropyl)iodonium triflate **2a** (88.8 mg, 0.170 mmol, 1.7 equiv) in DCE (1 mL) at 50 °C for 15 h. Purification via silica gel chromatography (pentane:EtOAc = 200:1) gave the desired product **3a** as a colorless oil in 94% yield (50.0 mg). **TLC**  $R_f$  = 0.7 (pentane:EtOAc = 20:1);  **$^1\text{H}$  NMR** (300 MHz,  $\text{CDCl}_3$ , 300 K):  $\delta$  (ppm) = 8.00 (d,  $J$  = 8.5 Hz, 2H), 7.40 (d,  $J$  = 8.3 Hz, 2H), 4.33 (q,  $J$  = 7.1 Hz, 2H), 2.40 – 2.35 (m, 2H), 1.86 – 1.52 (m, 2H), 1.34 (t,  $J$  = 7.1 Hz, 3H), 0.99 (t,  $J$  = 7.3 Hz, 3H);  **$^{13}\text{C}$  NMR** (75 MHz,  $\text{CDCl}_3$ , 300 K):  $\delta$  (ppm) = 165.55, 151.76 (t,  $J$  = 5.6 Hz, 1C), 134.74, 132.66, 130.21, 129.09, 127.27 (t,  $J$  = 21.1 Hz, 1C), 117.92 (q,  $J$  = 318.5 Hz,  $\text{OSO}_2\text{CF}_3$ ), 125.00 – 100.00 (m,  $\text{CF}_2\text{CF}_2\text{CF}_3$ ), 114.92 (t,  $J$  = 31.7 Hz), 109.07 (t,  $J$  = 38.2 Hz, 1C), 61.44, 30.00, 22.36, 14.23, 14.13;  **$^{19}\text{F}$  NMR** (282 MHz,  $\text{CDCl}_3$ , 300 K):  $\delta$  (ppm) = -74.35 (s, 3F), -80.40 (t,  $J$  = 10.4 Hz, 3F), -106.15 – -106.25 (m, 2F), -123.87 – -124.00 (m, 2F); **HRMS** (ESI)  $m/z$  = 534.0559, calcd. for  $\text{C}_{18}\text{H}_{16}\text{F}_{10}\text{O}_5\text{SNa}$   $[\text{M}+\text{Na}]^+$ , found: 534.0449; **IR** (neat,  $\text{cm}^{-1}$ ): 2974w, 1726m, 1668w, 1611w, 1422m, 1369w, 1348w, 1274s, 1213s, 1181s, 1136s, 1103s, 1072w, 1024w, 976m, 936w, 866s, 838s, 787w, 761w, 748w, 709w, 671w, 631w.

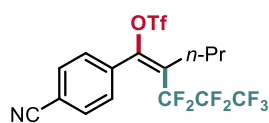

**(E)-1-(4-Cyanophenyl)-3,3,4,4,5,5,5-heptafluoro-2-propyl nt-1-en-1-yl trifluoromethanesulfonate (3b):** The

title compound was prepared according to general procedure GP2 with CuCl (1.0 mg, 10  $\mu$ mol, 10 mol%), 4-(pent-1-yn-1-yl)benzonitrile **1b** (16.9 mg, 0.100 mmol, 1.0 equiv), and phenyl(perfluoropropyl)iodonium triflate **2a** (88.8 mg, 0.170 mmol, 1.7 equiv) in DCE (1 mL) at 50 °C for 15 h. Purification via silica gel chromatography (pentane:EtOAc = 200:1) gave the desired product **3b** as a light yellow oil in 88% yield (42.7 mg). **TLC**  $R_f$  = 0.5 (pentane:EtOAc = 40:1);  **$^1\text{H}$  NMR** (300 MHz,  $\text{CDCl}_3$ , 300 K):  $\delta$  (ppm) = 7.64 (d,  $J$  = 8.5 Hz, 2H), 7.45 (d,  $J$  = 8.3 Hz, 2H), 2.41 –

2.36 (m, 2H), 1.72 – 1.59 (m, 2H), 0.99 (t,  $J = 7.3$  Hz, 3H);  $^{13}\text{C}$  NMR (75 MHz,  $\text{CDCl}_3$ , 300 K):  $\delta$  (ppm) = 150.35 (t,  $J = 5.5$  Hz, 1C), 135.02, 131.77, 130.90, 128.28 (t,  $J = 21.7$  Hz, 1C), 117.89 (q,  $J = 320.6$  Hz,  $\text{OSO}_2\text{CF}_3$ ), 125.00 – 100.00 (m,  $\text{CF}_2\text{CF}_2\text{CF}_3$ ), 117.59, 114.99, 30.00, 22.34, 14.10;  $^{19}\text{F}$  NMR (282 MHz,  $\text{CDCl}_3$ , 300 K):  $\delta$  (ppm) = -74.31 (s, 3F), -80.38 (t,  $J = 10.4$  Hz, 3F), -106.20 – -106.30 (m, 2F), -123.92 – -124.05 (m, 2F); HRMS (ESI)  $m/z = 510.0192$ , calcd. for  $\text{C}_{16}\text{H}_{11}\text{F}_{10}\text{NO}_3\text{SNa}$   $[\text{M}+\text{Na}]^+$ , found: 510.0192; IR (neat,  $\text{cm}^{-1}$ ): 2922w, 2851w, 2236w, 1670w, 1463w, 1423w, 1348w, 1215s, 1183m, 1136m, 1113m, 1073w, 1030w, 980w, 936w, 880w, 853s, 790w, 747w, 674w, 646w.

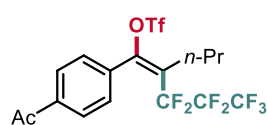

**(E)-1-(4-Acetylphenyl)-3,3,4,4,5,5,5-heptafluoro-2-propylprop-1-en-1-yl trifluoromethanesulfonate (3c):** The title compound was prepared according to general procedure

GP2 with  $\text{CuCl}$  (1.0 mg, 10  $\mu\text{mol}$ , 10 mol%), 1-(4-(pent-1-yn-1-yl)phenyl)ethan-1-one **1c** (18.6 mg, 0.100 mmol, 1.0 equiv), and phenyl(perfluoropropyl)iodonium triflate **2a** (88.8 mg, 0.170 mmol, 1.7 equiv) in DCE (1 mL) at 50  $^\circ\text{C}$  for 15 h. Purification via silica gel chromatography (pentane:EtOAc = 200:1) gave the desired product **3c** as a light yellow oil in 87% yield (44.1 mg). TLC  $R_f = 0.3$  (pentane:EtOAc = 40:1);  $^1\text{H}$  NMR (300 MHz,  $\text{CDCl}_3$ , 300 K):  $\delta$  (ppm) = 7.90 (d,  $J = 8.5$  Hz, 2H), 7.43 (d,  $J = 8.2$  Hz, 2H), 2.56 (s, 3H), 2.40 – 2.35 (m, 2H), 1.72 – 1.59 (m, 2H), 0.99 (t,  $J = 7.3$  Hz, 3H);  $^{13}\text{C}$  NMR (75 MHz,  $\text{CDCl}_3$ , 300 K):  $\delta$  (ppm) = 197.01, 151.59 (t,  $J = 5.5$  Hz, C), 127.34 (t,  $J = 21.4$  Hz, C), 138.62, 134.93, 130.51, 127.76, 117.92 (q,  $J = 320.5$  Hz,  $\text{OSO}_2\text{CF}_3$ ), 125.00 – 100.00 (m,  $\text{CF}_2\text{CF}_2\text{CF}_3$ ), 29.99, 26.60, 22.36, 14.10;  $^{19}\text{F}$  NMR (282 MHz,  $\text{CDCl}_3$ , 300 K):  $\delta$  (ppm) = -74.40 (s, 3F), -80.42 (t,  $J = 10.3$  Hz, 3F), -106.18 – -106.28 (m, 2F), -122.90 – -124.03 (m, 2F); HRMS (ESI)  $m/z = 527.0345$ , calcd. for  $\text{C}_{17}\text{H}_{14}\text{F}_{10}\text{O}_4\text{SNa}$   $[\text{M}+\text{Na}]^+$ , found: 527.0347; IR (neat,  $\text{cm}^{-1}$ ): 2970w, 2884w, 1695m, 1669w, 1607w, 1421s, 1405m, 1394m, 1263m, 1215s, 1183s, 1137s, 1113s, 1072m, 958w, 936w, 880m, 853s, 743w, 674w, 605s.

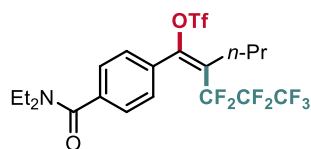

**(E)-1-(4-(Diethylcarbamoyl)phenyl)-3,3,4,4,5,5,5-heptafluoro-2-propylpent-1-en-1-yl trifluoromethane sulfonate**

**(3d):** The title compound was prepared according to general

procedure **GP2** with CuCl (1.0 mg, 10  $\mu$ mol, 10 mol%), *N,N*-diethyl-4-(pent-1-yn-1-yl)benzamide **1d** (24.3 mg, 0.100 mmol, 1.0 equiv), and phenyl(perfluoropropyl)iodonium triflate **2a** (88.8 mg, 0.170 mmol, 1.7 equiv) in DCE (1 mL) at 50 °C for 15 h. Purification via silica gel chromatography (pentane:EtOAc = 40:1, then 20:1) gave the desired product **3d** as a colorless oil in 79% yield (44.3 mg). **TLC**  $R_f$  = 0.7 (pentane:EtOAc = 4:1);  **$^1\text{H}$  NMR** (300 MHz,  $\text{CDCl}_3$ , 300 K):  $\delta$  (ppm) = 7.38 – 7.31 (m, 4H), 3.48 (br, 2H), 3.09 (br, 2H), 2.40 – 2.34 (m, 2H), 1.72 – 1.59 (m, 2H), 1.19 – 0.96 (m, 9H);  **$^{13}\text{C}$  NMR** (75 MHz,  $\text{CDCl}_3$ , 300 K):  $\delta$  (ppm) = 169.97, 152.12 (t,  $J$  = 5.6 Hz, 1C), 139.60, 131.35, 130.27, 126.96 (t,  $J$  = 21.4 Hz, 1C), 125.98, 117.92 (q,  $J$  = 320.7 Hz,  $\text{OSO}_2\text{CF}_3$ ), 125.00 – 105.00 (m,  $\text{CF}_2\text{CF}_2\text{CF}_3$ ), 43.25, 39.52, 29.97, 22.33, 14.09, 14.03, 12.85;  **$^{19}\text{F}$  NMR** (282 MHz,  $\text{CDCl}_3$ , 300 K):  $\delta$  (ppm) = -74.47 (s, 3F), -80.46 (t,  $J$  = 11.1 Hz, 3F), -106.06 – -106.18 (m, 2F), -123.88 – -124.01 (m, 2F); **HRMS** (ESI)  $m/z$  = 584.0924, calcd. for  $\text{C}_{20}\text{H}_{21}\text{F}_{10}\text{NO}_4\text{SNa}$   $[\text{M}+\text{Na}]^+$ , found: 584.0924; **IR** (neat,  $\text{cm}^{-1}$ ): 2975w, 2938w, 2881w, 1638s, 1420s, 1384w, 1349m, 1317w, 1289m, 1212s, 1182s, 1136s, 1112s, 1095s, 1071s, 1024w, 973m, 937m, 878s, 851s, 788w, 748m, 675w, 605s.

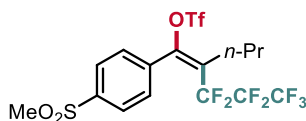

**(E)-3,3,4,4,5,5,5-Heptafluoro-1-(4-(methylsulfonyl)phenyl)-2-propylpent-1-en-1-yl trifluoromethanesulfonate (3e):** The title compound was

prepared according to general procedure **GP2** with CuCl (1.0 mg, 10  $\mu$ mol, 10 mol%), 1-(methylsulfonyl)-4-(pent-1-yn-1-yl)benzene **1e** (22.2 mg, 0.100 mmol, 1.0 equiv), and phenyl(perfluoropropyl)iodonium triflate **2a** (104 mg, 0.200 mmol, 2.0 equiv) in DCE (1 mL) at 50 °C for 15 h. Purification via silica gel chromatography (pentane:EtOAc = 30:1, then 15:1) gave the desired product **3e** as a colorless oil in 90% yield (48.4 mg). **TLC**  $R_f$  = 0.4 (pentane:EtOAc = 7:1);  **$^1\text{H}$  NMR** (300 MHz,  $\text{CDCl}_3$ , 300 K):  $\delta$  (ppm) = 7.89 (d,  $J$  = 8.4 Hz, 2H), 7.51 (d,  $J$  = 8.2 Hz, 2H), 2.98 (s, 3H), 2.39

– 2.33 (m, 2H), 1.64 (tq,  $J^1 = 7.8$  Hz,  $J^2 = 7.5$  Hz, 2H), 0.96 (t,  $J = 7.3$  Hz, 3H);  $^{13}\text{C}$  NMR (75 MHz,  $\text{CDCl}_3$ , 300 K):  $\delta$  (ppm) = 150.32 (t,  $J = 5.6$  Hz, C), 142.79, 135.97, 131.23, 128.31 (t,  $J = 21.5$  Hz, C), 127.09, 117.86 (q,  $J = 320.5$  Hz,  $\text{OSO}_2\text{CF}_3$ ), 125.00 – 100.00 (m,  $\text{CF}_2\text{CF}_2\text{CF}_3$ ), 44.29, 30.01, 22.34, 14.10;  $^{19}\text{F}$  NMR (282 MHz,  $\text{CDCl}_3$ , 300 K):  $\delta$  (ppm) = -74.36 (s, 3F), -80.35 (t,  $J = 10.3$  Hz, 3F), -106.27 (q,  $J = 8.5$  Hz, 2F), -124.93 – -124.07 (m, 2F); HRMS (ESI)  $m/z = 563.0015$ , calcd. for  $\text{C}_{16}\text{H}_{14}\text{F}_{10}\text{O}_5\text{S}_2\text{Na}$   $[\text{M}+\text{Na}]^+$ , found: 563.0022; IR (neat,  $\text{cm}^{-1}$ ): 2973w, 2937w, 2885w, 1670m, 1422m, 1349w, 1320m, 1213s, 1184s, 1153s, 1135s, 1113s, 1090m, 1072m, 979m, 957m, 936m, 890m, 879m, 853s, 789w, 749m, 731w, 701w, 673w, 604s.

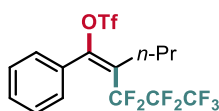

**(E)-3,3,4,4,5,5,5-Heptafluoro-1-phenyl-2-propylpent-1-en-1-yl**

**trifluoromethanesulfonate (3f):** The title compound was prepared according to general procedure **GP2** with  $\text{CuCl}$  (1.0 mg, 10  $\mu\text{mol}$ ,

10 mol%), pent-1-yn-1-ylbenzene **1f** (14.4 mg, 0.100 mmol, 1.0 equiv), and phenyl(perfluoropropyl)iodonium triflate **2a** (78.3 mg, 0.150 mmol, 1.5 equiv) in DCE (1 mL) at room temperature for 24 h. The desired product **3f** could not be separated from the perfluoropropylated by-products resulting from arene perfluoroalkylation. The yield (88%) is based on  $^{19}\text{F}$  NMR analysis with  $\text{PhCF}_3$  as internal standard. TLC  $R_f = 0.8$  (pentane);  $^{19}\text{F}$  NMR (282 MHz,  $\text{CDCl}_3$ , 300 K):  $\delta$  (ppm) = -74.50 (s, 3F), -80.44 (t,  $J = 10.3$  Hz, 3F), -106.06 (q,  $J = 9.1$  Hz, 2F), -123.83 – -123.96 (m, 2F); HRMS (ESI)  $m/z = 485.0240$ , calcd. for  $\text{C}_{15}\text{H}_{12}\text{F}_{10}\text{O}_3\text{SNa}$   $[\text{M}+\text{Na}]^+$ , found: 485.0252.

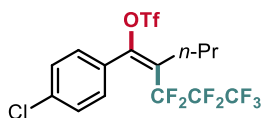

**(E)-1-(4-Chlorophenyl)-3,3,4,4,5,5,5-heptafluoro-2-propyl**

**pent-1-en-1-yl trifluoromethanesulfonate (3g):** The title compound was prepared according to general procedure **GP2**

with  $\text{CuCl}$  (1.0 mg, 10  $\mu\text{mol}$ , 10 mol%), 1-chloro-4-(pent-1-yn-1-yl)benzene **1g** (17.8 mg, 0.100 mmol, 1.0 equiv), and phenyl(perfluoropropyl)iodonium triflate **2a** (78.3 mg, 0.150 mmol, 1.5 equiv) in DCE (1 mL) at room temperature for 24 h. The desired product **3g** could not be separated from the perfluoropropylated by-products resulting from arene perfluoroalkylation. The yield (79%) is based on  $^{19}\text{F}$  NMR analysis with  $\text{PhCF}_3$  as internal standard. TLC  $R_f = 0.75$  (pentane);  $^{19}\text{F}$  NMR (282 MHz,  $\text{CDCl}_3$ , 300

K):  $\delta$  (ppm) = -74.39 (s, 3F), -80.36 (t,  $J$  = 10.3 Hz, 3F), -106.23 (q,  $J$  = 9.9 Hz, 2F), -124.05 – -124.09 (m, 2F); **EI-MS** ( $m/z$ , relative intensity): 496 ( $M^+$ , 6), 447 (4), 383 (6), 311 (6), 139 (100), 111 (24), 75 (8), 69 (18).

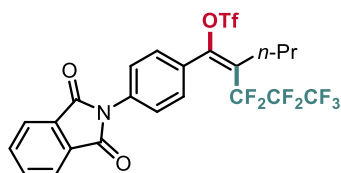

**(E)-1-(4-(1,3-Dioxoisindolin-2-yl)phenyl)-3,3,4,4,5,5,5-heptafluoro-2-propylpent-1-en-1-yl trifluoromethanesulfonate (3h):** The title compound was prepared according to general procedure **GP2** with

CuCl (1.0 mg, 10  $\mu$ mol, 10 mol%), 2-(4-(pent-1-yn-1-yl)phenyl)isoindoline-1,3-dione **1h** (28.9 mg, 0.100 mmol, 1.0 equiv), and phenyl(perfluoropropyl)iodonium triflate **2a** (78.3 mg, 0.150 mmol, 1.5 equiv) in DCE (1 mL) at room temperature for 24 h. The desired product **3h** could not be separated from the perfluoropropylated by-products. The yield (93%) is based on  $^{19}\text{F}$  NMR analysis with  $\text{PhCF}_3$  as internal standard. **TLC**  $R_f$  = 0.3 (pentane:EtOAc = 20:1);  $^{19}\text{F}$  NMR (282 MHz,  $\text{CDCl}_3$ , 300 K):  $\delta$  (ppm) = -74.35 (s, 3F), -80.28 (t,  $J$  = 10.3 Hz, 3F), -106.19 (q,  $J$  = 9.9 Hz, 2F), -123.96 – -124.00 (m, 2F); **HRMS** (ESI)  $m/z$  = 630.0403, calcd. for  $\text{C}_{23}\text{H}_{15}\text{F}_{10}\text{NO}_5\text{SNa}$  [ $M+\text{Na}$ ] $^+$ , found: 630.0403.

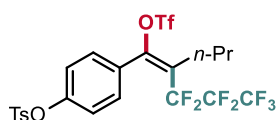

**(E)-4-(3,3,4,4,5,5,5-Heptafluoro-2-propyl-1-(((trifluoromethyl)sulfonyl)oxy)pent-1-en-1-yl)phenyl 4-methylbenzenesulfonate (3i):** The title compound was

prepared according to general procedure **GP2** with CuCl (1.0 mg, 10  $\mu$ mol, 10 mol%), 4-(pent-1-yn-1-yl)phenyl 4-methylbenzenesulfonate **1i** (31.4 mg, 0.100 mmol, 1.0 equiv), and phenyl(perfluoropropyl)iodonium triflate **2a** (78.3 mg, 0.150 mmol, 1.5 equiv) in DCE (1 mL) at room temperature for 24 h. Purification via silica gel chromatography (pentane:EtOAc = 150:1) gave the desired product **3i** as a colorless oil in 90% yield (56.9 mg). **TLC**  $R_f$  = 0.4 (pentane:EtOAc = 40:1);  $^1\text{H}$  NMR (300 MHz,  $\text{CDCl}_3$ , 300 K):  $\delta$  (ppm) = 7.54 (d,  $J$  = 8.4 Hz, 2H), 7.24 (d,  $J$  = 8.5 Hz, 2H), 7.18 (d,  $J$  = 8.1 Hz, 2H), 6.95 (d,  $J$  = 8.7 Hz, 2H), 2.35 (s, 3H), 2.36 – 2.31 (m, 2H), 1.68 – 1.55 (m, 2H), 0.97 (t,  $J$  = 7.3 Hz, 3H);  $^{13}\text{C}$  NMR (75 MHz,  $\text{CDCl}_3$ , 300 K):  $\delta$  (ppm) = 151.48 (t,  $J$  = 5.6 Hz, 1C), 151.33, 145.75, 131.74, 131.67, 129.70, 129.45, 128.55, 127.25 (t,

$J = 21.2$  Hz, 1C), 122.17, 117.90 (q,  $J = 318.5$  Hz,  $\text{OSO}_2\text{CF}_3$ ), 125.00 – 100.00 (m,  $\text{CF}_2\text{CF}_2\text{CF}_3$ ), 29.96, 22.33, 21.59, 14.09;  $^{19}\text{F}$  NMR (282 MHz,  $\text{CDCl}_3$ , 300 K):  $\delta$  (ppm) = -74.39 (s, 3F), -80.47 (t,  $J = 10.4$  Hz, 3F), -106.06 (q,  $J = 9.6$  Hz, 2F), -123.91 – -123.91 (m, 2F); **HRMS** (ESI)  $m/z = 655.0277$ , calcd. for  $\text{C}_{22}\text{H}_{18}\text{F}_{10}\text{NaO}_6\text{S}_2\text{Na}$   $[\text{M}+\text{Na}]^+$ , found: 655.0296; **IR** (neat,  $\text{cm}^{-1}$ ): 2973w, 1669w, 1600w, 1501w, 1421m, 1383m, 1349w, 1213s, 1201s, 1179s, 1159s, 1136s, 1113s, 1093s, 1072m, 1020w, 975m, 936w, 860s, 838s, 814m, 744s, 720m, 667m, 604s.

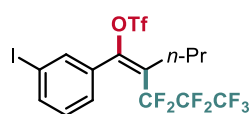

**(E)-3,3,4,4,5,5,5-Heptafluoro-1-(3-iodophenyl)-2-propylpen-1-en-1-yl trifluoromethanesulfonate (3j):**

The title compound was prepared according to general procedure **GP2** with  $\text{CuCl}$  (1.0 mg, 10  $\mu\text{mol}$ , 10 mol%), 1-iodo-3-(pent-1-yn-1-yl)benzene **1j** (27.0 mg, 0.100 mmol, 1.0 equiv), and phenyl(perfluoropropyl)iodonium triflate **2a** (78.3 mg, 0.150 mmol, 1.5 equiv) in DCE (1 mL) at room temperature for 24 h. Purification via silica gel chromatography (pentane) gave the desired product **3j** as a colorless oil in 83% yield (48.6 mg). **TLC**  $R_f = 0.8$  (pentane);  $^1\text{H}$  NMR (300 MHz,  $\text{CDCl}_3$ , 300 K):  $\delta$  (ppm) = 7.74 (dt,  $J^1 = 8.0$  Hz,  $J^2 = 1.4$  Hz, 1H), 7.67 (s, 1H), 7.30 (d,  $J = 7.8$  Hz, 1H), 7.06 (t,  $J = 7.9$  Hz, 1H), 2.38 – 2.32 (m, 2H), 1.70 – 1.58 (m, 2H), 0.98 (t,  $J = 7.3$  Hz, 3H);  $^{13}\text{C}$  NMR (101 MHz,  $\text{CDCl}_3$ , 300 K): 151.00 (t,  $J = 5.5$  Hz, 1C), 139.89, 138.60, 132.44, 129.52, 129.28, 127.22 (t,  $J = 21.3$  Hz, 1C), 117.91 (q,  $J = 320.5$  Hz,  $\text{OSO}_2\text{CF}_3$ ), 125.00 – 100.00 (m,  $\text{CF}_2\text{CF}_2\text{CF}_3$ ), 92.83, 29.99, 22.35, 14.17;  $^{19}\text{F}$  NMR (282 MHz,  $\text{CDCl}_3$ , 300 K):  $\delta$  (ppm) = -74.35 (s, 3F), -80.39 (t,  $J = 10.1$  Hz, 3F), -106.27 (q,  $J = 10.3$  Hz, 2F), -123.85 – -123.97 (m, 2F); **HRMS** (ESI)  $m/z = 610.9206$ , calcd. for  $\text{C}_{15}\text{H}_{11}\text{F}_{10}\text{IO}_3\text{SNa}$   $[\text{M}+\text{Na}]^+$ , found: 610.9179; **IR** (neat,  $\text{cm}^{-1}$ ): 2975w, 2881w, 1560w, 1471w, 1421s, 1348m, 1211s, 1182s, 1136s, 1113s, 1070m, 1029w, 978m, 944w, 890m, 880s, 844s, 795m, 749w, 762m, 699m, 673m, 605s.

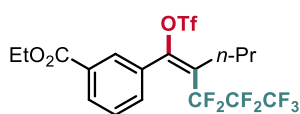

**Ethyl (E)-3-(3,3,4,4,5,5,5-heptafluoro-2-propyl-1-((trifluoromethyl)sulfonyl)oxy)pent-1-en-1-yl)benzoate (3k):**

The title compound was prepared according to general procedure **GP2** with  $\text{CuCl}$  (1.0 mg, 10  $\mu\text{mol}$ , 10 mol%), ethyl 3-(pent-1-yn-1-

yl)benzoate **1k** (21.6 mg, 0.100 mmol, 1.0 equiv), and phenyl(perfluoropropyl)iodonium triflate **2a** (88.8 mg, 0.170 mmol, 1.7 equiv) in DCE (1 mL) at 50 °C for 15 h. Purification via silica gel chromatography (pentane:EtOAc = 200:1) gave the desired product **3k** as a slight yellow oil in 95% yield (50.9 mg). **TLC**  $R_f$  = 0.7 (pentane:EtOAc = 20:1); **<sup>1</sup>H NMR** (300 MHz, CDCl<sub>3</sub>, 300 K):  $\delta$  (ppm) = 8.08 (dt,  $J$  = 7.7 Hz,  $J$  = 1.4 Hz, 1H), 8.00 (s, 1H), 7.51 (d,  $J$  = 7.7 Hz, 1H), 7.41 (t,  $J$  = 7.7 Hz, 1H), 4.33 (q,  $J$  = 7.1 Hz, 2H), 2.40 – 2.35 (m, 2H), 1.73 – 1.60 (m, 2H), 1.33 (t,  $J$  = 7.1 Hz, 3H), 0.99 (t,  $J$  = 7.3 Hz, 3H); **<sup>13</sup>C NMR** (75 MHz, CDCl<sub>3</sub>, 300 K):  $\delta$  (ppm) = 165.37, 151.82 (t,  $J$  = 5.4 Hz, C), 134.17, 131.86, 131.22, 131.03, 130.63, 128.13, 127.19 (t,  $J$  = 21.6 Hz, C), 117.94 (q,  $J$  = 320.5 Hz, OSO<sub>2</sub>CF<sub>3</sub>), 125.00 – 100.00 (m, CF<sub>2</sub>CF<sub>2</sub>CF<sub>3</sub>), 61.43, 30.03 (t,  $J$  = 2.6 Hz, C), 22.38, 14.20, 14.15; **<sup>19</sup>F NMR** (282 MHz, CDCl<sub>3</sub>, 300 K):  $\delta$  (ppm) = -74.40 (s, 3F), -80.43 (t,  $J$  = 10.3 Hz, 3F), -106.16 – -106.26 (m, 2F), -123.88 – -124.01 (m, 2F); **HRMS** (ESI)  $m/z$  = 557.0451, calcd. for C<sub>18</sub>H<sub>16</sub>F<sub>10</sub>O<sub>5</sub>SNa [M+Na]<sup>+</sup>, found: 557.0462; **IR** (neat, cm<sup>-1</sup>): 2924w, 2854w, 1728m, 1670w, 1422m, 1370w, 1349w, 1272m, 1207s, 1183s, 1137s, 1114s, 1028w, 987w, 958w, 924w, 883w, 863w, 840m, 764w, 749w, 704w, 620w, 607w.

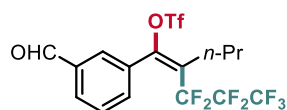

**(E)-3,3,4,4,5,5,5-Heptafluoro-1-(3-formylphenyl)-2-propyl pent-1-en-1-yl trifluoromethanesulfonate (3l):** The title compound was prepared according to general procedure **GP2**

with CuCl (1.0 mg, 10  $\mu$ mol, 10 mol%), 3-(pent-1-yn-1-yl)benzaldehyde **1l** (17.2 mg, 0.100 mmol, 1.0 equiv), and phenyl(perfluoropropyl)iodonium triflate **2a** (88.8 mg, 0.170 mmol, 1.7 equiv) in DCE (1 mL) at 50 °C for 15 h. Purification via silica gel chromatography (pentane:EtOAc = 200:1, then 150:1) gave the desired product **3l** as a slight yellow oil in 82% yield (40.1 mg). **TLC**  $R_f$  = 0.5 (pentane:EtOAc = 40:1); **<sup>1</sup>H NMR** (300 MHz, CDCl<sub>3</sub>, 300 K):  $\delta$  (ppm) = 9.96 (s, 1H), 7.93 (dt,  $J^1$  = 7.4 Hz,  $J^2$  = 1.6 Hz, 1H), 7.83 (s, 1H), 7.59 (d,  $J$  = 7.7 Hz, 1H), 7.52 (t,  $J$  = 7.6 Hz, 1H), 2.42 – 2.36 (m, 2H), 1.67 (tq,  $J^1$  = 7.8 Hz,  $J^2$  = 7.5 Hz, 2H), 1.00 (t,  $J$  = 7.3 Hz, 3H); **<sup>13</sup>C NMR** (75 MHz, CDCl<sub>3</sub>, 300 K):  $\delta$  (ppm) = 190.77, 151.22 (t,  $J$  = 5.6 Hz, C), 136.13, 135.66, 131.83, 131.64, 131.39, 128.87, 127.72 (t,  $J$  = 21.2 Hz, C), 117.92 (q,  $J$  = 318.5 Hz,

OSO<sub>2</sub>CF<sub>3</sub>), 125.00 – 100.00 (m, CF<sub>2</sub>CF<sub>2</sub>CF<sub>3</sub>) 30.03, 22.40, 14.14; **<sup>19</sup>F NMR** (282 MHz, CDCl<sub>3</sub>, 300 K): δ (ppm) = -74.42 (s, 3F), -80.43 (t, *J* = 10.3 Hz, 3F), -106.18 (q, *J* = 8.5 Hz, 2F), -124.00 – -124.12 (m, 2F); **HRMS** (ESI) *m/z* = 513.0189, calcd. for C<sub>16</sub>H<sub>12</sub>F<sub>10</sub>O<sub>4</sub>SNa [M+Na]<sup>+</sup>, found: 513.0187; **IR** (neat, cm<sup>-1</sup>): 2358<sub>w</sub>, 1707<sub>w</sub>, 1420<sub>w</sub>, 1349<sub>w</sub>, 1227<sub>w</sub>, 1184<sub>w</sub>, 1137<sub>w</sub>, 1072<sub>w</sub>, 997<sub>w</sub>, 904<sub>s</sub>, 828<sub>w</sub>, 724<sub>s</sub>, 649<sub>m</sub>, 606<sub>w</sub>.

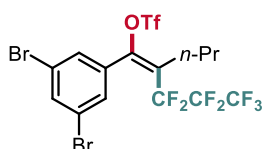

**(E)-1-(3,5-Dibromophenyl)-3,3,4,4,5,5,5-heptafluoro-2-propylpent-1-en-1-yl trifluoromethanesulfonate (3m):** The title compound was prepared according to general procedure

**GP2** with CuCl (1.0 mg, 10 μmol, 10 mol%), 1,3-dibromo-5-(pent-1-yn-1-yl)benzene **1m** (30.0 mg, 0.100 mmol, 1.0 equiv), and phenyl(perfluoropropyl)iodonium triflate **2a** (78.3 mg, 0.150 mmol, 1.5 equiv) in DCE (1 mL) at room temperature for 24 h. Purification via silica gel chromatography (pentane) gave the desired product **3m** as a colorless oil in 81% yield (50.1 mg). **TLC** *R<sub>f</sub>* = 0.85 (pentane); **<sup>1</sup>H NMR** (300 MHz, CDCl<sub>3</sub>, 300 K): δ (ppm) = 7.73 – 7.71 (m, 1H), 7.43 – 7.41 (m, 2H), 2.40 – 2.32 (m, 2H), 1.69 – 1.57 (m, 2H), 0.98 (t, *J* = 7.3 Hz, 3H); **<sup>13</sup>C NMR** (75 MHz, CDCl<sub>3</sub>, 300 K): δ (ppm) = 149.40 (t, *J* = 5.5 Hz, C), 136.62, 133.75, 131.65, 122.42, 117.98 (q, *J* = 320.6 Hz, OSO<sub>2</sub>CF<sub>3</sub>), 128.39 (t, *J* = 21.3 Hz, C); 125.00 – 100.00 (m, CF<sub>2</sub>CF<sub>2</sub>CF<sub>3</sub>), 30.04, 22.29, 14.11; **<sup>19</sup>F NMR** (282 MHz, CDCl<sub>3</sub>, 300 K): δ (ppm) = -74.21 – -74.32 (m, 3F), -80.29 – -80.50 (m, 3F), -106.39 – -106.53 (m, 2F), -123.88 – -123.93 (m, 2F); **HRMS** (ESI) *m/z* = 642.8430, calcd. for C<sub>15</sub>H<sub>10</sub>Br<sub>2</sub>F<sub>10</sub>O<sub>3</sub>SNa [M+Na]<sup>+</sup>, found: 642.8425; **IR** (neat, cm<sup>-1</sup>): 2973<sub>w</sub>, 2882<sub>w</sub>, 1670<sub>w</sub>, 1583<sub>w</sub>, 1552<sub>m</sub>, 1423<sub>m</sub>, 1348<sub>w</sub>, 1212<sub>s</sub>, 1181<sub>s</sub>, 1135<sub>s</sub>, 1113<sub>s</sub>, 1073<sub>w</sub>, 1000<sub>w</sub>, 987<sub>w</sub>, 957<sub>w</sub>, 898<sub>m</sub>, 846<sub>s</sub>, 868<sub>s</sub>, 791<sub>s</sub>, 748<sub>w</sub>, 666<sub>m</sub>, 606<sub>s</sub>.

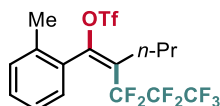

**(E)-3,3,4,4,5,5,5-Heptafluoro-2-propyl-1-(o-tolyl)pent-1-en-1-yl trifluoromethanesulfonate (3n):** The title compound was prepared according to general procedure **GP2** with CuCl (1.0 mg,

10 μmol, 10 mol%), 1-methyl-2-(pent-1-yn-1-yl)benzene **1n** (15.8 mg, 0.100 mmol, 1.0 equiv), and phenyl(perfluoropropyl)iodonium triflate **2a** (78.3 mg, 0.150 mmol, 1.5 equiv) in DCE (1 mL) at room temperature for 24 h. The desired product **3n** could not

be separated from the perfluoropropylated by-products resulting from arene perfluoroalkylation. The yield (70%) is based on  $^{19}\text{F}$  NMR analysis with  $\text{PhCF}_3$  as internal standard. **TLC**  $R_f$  = 0.75 (pentane);  $^{19}\text{F}$  NMR (282 MHz,  $\text{CDCl}_3$ , 300 K):  $\delta$  (ppm) = -74.82 (s, 3F), -80.42 (t,  $J$  = 10.4 Hz, 3F), -105.04 – -106.17 (m, 1F), -108.74 – -109.88 (m, 1F), -123.99 – -124.01 (m, 1F), -124.34 – -124.40 (m, 1F); **HRMS** (ESI)  $m/z$  = 499.0396, calcd. for  $\text{C}_{16}\text{H}_{14}\text{F}_{10}\text{O}_3\text{SNa}$   $[\text{M}+\text{Na}]^+$ , found: 499.0393.

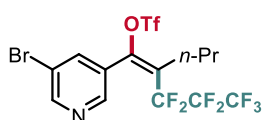

**(E)-1-(5-Bromopyridin-3-yl)-3,3,4,4,5,5,5-heptafluoro-2-propylpent-1-en-1-yl trifluoromethanesulfonate (3o):** The title compound was prepared according to general procedure **GP2**

with  $\text{CuCl}$  (1.0 mg, 10  $\mu\text{mol}$ , 10 mol%), 3-bromo-5-(pent-1-yn-1-yl)pyridine **1o** (17.2 mg, 0.100 mmol, 1.0 equiv), and phenyl(perfluoropropyl)iodonium triflate **2a** (88.8 mg, 0.170 mmol, 1.7 equiv) in DCE (1 mL) at 50  $^\circ\text{C}$  for 15 h. Purification via silica gel chromatography (pentane:EtOAc = 200:1, then 150:1) gave the desired product **3o** as a slight yellow oil in 47% yield (25.4 mg). **TLC**  $R_f$  = 0.5 (pentane:EtOAc = 20:1);  $^1\text{H}$  NMR (300 MHz,  $\text{CDCl}_3$ , 300 K):  $\delta$  (ppm) = 8.71 (s, 1H), 8.48 (s, 1H), 7.80 (s, 1H), 2.42 – 2.37 (m, 2H), 1.65 (tq,  $J^1$  = 7.8 Hz,  $J^2$  = 7.5 Hz, 2H), 1.00 (t,  $J$  = 7.3 Hz, 3H);  $^{13}\text{C}$  NMR (75 MHz,  $\text{CDCl}_3$ , 300 K):  $\delta$  (ppm) = 152.92, 148.32, 148.04 (t,  $J$  = 5.5 Hz, 1C), 139.74, 129.88 (t,  $J$  = 21.4 Hz, C), 128.41, 119.75, 117.90 (q,  $J$  = 318.4 Hz,  $\text{OSO}_2\text{CF}_3$ ), 125.00 – 100.00 (m,  $\text{CF}_2\text{CF}_2\text{CF}_3$ ), 30.12, 22.41, 14.13;  $^{19}\text{F}$  NMR (282 MHz,  $\text{CDCl}_3$ , 300 K): -74.17 (s, 3F), -80.30 (q,  $J$  = 9.8 Hz, 3F), -106.27 – -106.30 (m, 2F), -124.11 – -124.24 (m, 2F); **HRMS** (ESI)  $m/z$  = 565.9277; calcd. For  $\text{C}_{14}\text{H}_{10}\text{BrF}_{10}\text{NO}_3\text{SNa}$   $[\text{M}+\text{Na}]^+$ , found: 565.9287; **IR** (neat,  $\text{cm}^{-1}$ ): 2974w, 2364w, 1669w, 1578w, 1548w, 1424m, 1349w, 1215s, 1182m, 1135s, 1114s, 1100w, 1073m, 1024w, 985m, 896m, 880w, 846s, 781w, 757w, 746w, 704w, 675w, 606m.

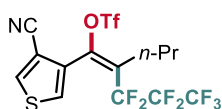

**(E)-1-(4-Cyanothiophen-3-yl)-3,3,4,4,5,5,5-heptafluoro-2-propylpent-1-en-1-yl trifluoromethanesulfonate (3p):** The title

compound was prepared according to general procedure **GP2** with  $\text{CuCl}$  (1.0 mg, 10  $\mu\text{mol}$ , 10 mol%), 4-(pent-1-yn-1-yl)thiophene-3-carbonitrile **1p** (17.5 mg, 0.100 mmol, 1.0 equiv), and phenyl(perfluoropropyl)iodonium triflate **2a** (88.8 mg, 0.170 mmol, 1.7

equiv) in DCE (1 mL) at 50 °C for 15 h. Purification via silica gel chromatography (pentane:EtOAc = 200:1) gave the desired product **3p** as a colorless oil in 85% yield (42.0 mg). **TLC**  $R_f$  = 0.55 (pentane:EtOAc = 20:1);  **$^1\text{H}$  NMR** (300 MHz,  $\text{CDCl}_3$ , 300 K):  $\delta$  (ppm) = 7.91 (d,  $J$  = 3.1 Hz, 1H), 7.56 (d,  $J$  = 3.1 Hz, 1H), 2.41 (m, 2H), 1.75 – 1.61 (m, 2H), 1.00 (t,  $J$  = 7.4 Hz, 3H);  **$^{13}\text{C}$  NMR** (75 MHz,  $\text{CDCl}_3$ , 300 K):  $\delta$  (ppm) = 143.59 (t,  $J$  = 5.5 Hz, C), 135.88, 131.80, 131.90 – 131.24 (m, C), 131.44, 118.01 (q,  $J$  = 320.6 Hz,  $\text{OSO}_2\text{CF}_3$ ), 112.53, 125.00 – 100.00 (m,  $\text{CF}_2\text{CF}_2\text{CF}_3$ ), 30.27, 22.42, 14.06;  **$^{19}\text{F}$  NMR** (282 MHz,  $\text{CDCl}_3$ , 300 K):  $\delta$  (ppm) = -74.46 (s, 3F), -80.32 (t,  $J$  = 10.3 Hz, 3F), -105.32 – -106.41 (m, 1F), -108.47 – -109.45 (m, 1F), -124.48 (br, 1F), -124.67 (br, 1F); **HRMS** (ESI)  $m/z$  = 515.9756; calcd. For  $\text{C}_{14}\text{H}_9\text{F}_{10}\text{NO}_3\text{S}_2\text{Na}$   $[\text{M}+\text{Na}]^+$ , found: 515.9758; **IR** (neat,  $\text{cm}^{-1}$ ): 2974w, 2881w, 2238w, 1671w, 1422m, 1347w, 1283w, 1216s, 1184s, 1135s, 1117s, 1092w, 1071m, 1029w, 972m, 919m, 863s, 835s, 783w, 746m, 736m, 703w, 652w, 604m.

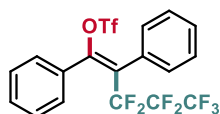

**(E)-3,3,4,4,5,5,5-Heptafluoro-1,2-diphenylpent-1-en-1-yl trifluoromethanesulfonate (3q):** The title compound was prepared according to general procedure **GP2** with CuCl (1.0 mg, 10  $\mu\text{mol}$ ,

10 mol%), 1,2-diphenylethyne **1q** (17.8 mg, 0.100 mmol, 1.0 equiv), and phenyl(perfluoropropyl)iodonium triflate **2a** (78.3 mg, 0.150 mmol, 1.5 equiv) in DCE (1 mL) at room temperature for 24 h. Then further portions of CuCl (1.0 mg, 10  $\mu\text{mol}$ , 10 mol%), phenyl(perfluoropropyl)iodonium triflate **2a** (78.3 mg, 0.150 mmol, 1.5 equiv) and DCE (1 mL) were added. The stirring was continued at room temperature for 24 h. Purification via silica gel chromatography (pentane) gave the desired product **3q** as a white solid in 69% yield (34.2 mg). **MP**: 79 °C;  **$^1\text{H}$  NMR** (300 MHz,  $\text{CDCl}_3$ , 300 K):  $\delta$  (ppm) = 7.62 – 7.33 (m, 10H);  **$^{13}\text{C}$  NMR** (75 MHz,  $\text{CDCl}_3$ , 300 K):  $\delta$  (ppm) = 153.64 (t,  $J$  = 4.1 Hz, C), 131.19, 130.14, 129.80, 129.65, 128.53, 128.16, 117.67 (q,  $J$  = 320.7 Hz,  $\text{OSO}_2\text{CF}_3$ ), 125.00 – 100.00 (m,  $\text{CF}_2\text{CF}_2\text{CF}_3$ );  **$^{19}\text{F}$  NMR** (282 MHz,  $\text{CDCl}_3$ , 300 K):  $\delta$  (ppm) = -74.88 (s, 3F), -80.40 (t,  $J$  = 10.5 Hz, 2F), -103.92 (q,  $J$  = 9.9 Hz, 2F), -122.35 – -122.48 (m, 2F); **HRMS** (ESI)  $m/z$  = 519.0083, calcd. for  $\text{C}_{18}\text{H}_{10}\text{F}_{10}\text{O}_3\text{SNa}$   $[\text{M}+\text{Na}]^+$ , found: 519.0091; **IR** (neat,  $\text{cm}^{-1}$ ): 2923w, 2851w, 1659w,

1494<sub>w</sub>, 1424<sub>m</sub>, 1345<sub>m</sub>, 1250<sub>s</sub>, 1183<sub>s</sub>, 1135<sub>s</sub>, 1112<sub>s</sub>, 1076<sub>w</sub>, 1037<sub>w</sub>, 1001<sub>w</sub>, 981<sub>w</sub>, 933<sub>w</sub>, 896<sub>w</sub>, 864<sub>m</sub>, 847<sub>m</sub>, 798<sub>m</sub>, 766<sub>m</sub>, 742<sub>m</sub>, 697<sub>m</sub>, 678<sub>m</sub>, 601<sub>m</sub>, 559<sub>m</sub>.

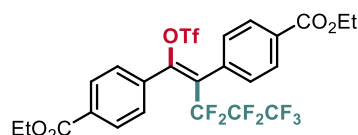

**Diethyl 4,4'-(3,3,4,4,5,5,5-heptafluoro-1-(((trifluoromethyl)sulfonyl)oxy)pent-1-ene-1,2-diyl)(E)-dibenzoate (3r):** The title compound was prepared according

to general procedure **GP2** with CuCl (1.0 mg, 10  $\mu$ mol, 10 mol%), diethyl 4,4'-(ethyne-1,2-diyl)dibenzoate **1r** (32.2 mg, 0.100 mmol, 1.0 equiv), and phenyl(perfluoropropyl)iodonium triflate **2a** (88.8 mg, 0.170 mmol, 1.7 equiv) in DCE (1 mL) at 50 °C for 15 h. Then further portions of CuCl (1.0 mg, 10  $\mu$ mol, 10 mol%), phenyl(perfluoropropyl)iodonium triflate **2a** (88.8 mg, 0.170 mmol, 1.7 equiv) and DCE (1 mL) were added. The stirring was continued at 50 °C for further 15 h. Purification via silica gel chromatography (pentane:EtOAc = 200:1) gave the desired product **3r** as a white solid in 64% yield (41.1 mg). **MP**: 99 °C; **TLC**  $R_f$  = 0.55 (pentane:EtOAc = 20:1); **<sup>1</sup>H NMR** (300 MHz, CDCl<sub>3</sub>, 300 K):  $\delta$  (ppm) = 8.10 (d,  $J$  = 5.0 Hz, 2H), 8.07 (d,  $J$  = 4.9 Hz, 2H), 7.56 (d,  $J$  = 8.1 Hz, 2H), 7.44 (d,  $J$  = 8.1 Hz, 2H), 4.35 (q,  $J$  = 7.1 Hz, 2H), 4.34 (q,  $J$  = 7.1 Hz, 2H), 1.35 (t,  $J$  = 7.1 Hz, 3H); 1.35 (t,  $J$  = 7.1 Hz, 3H); **<sup>13</sup>C NMR** (75 MHz, CDCl<sub>3</sub>, 300 K):  $\delta$  (ppm) = 165.72, 152.65 (t,  $J$  = 4.3 Hz, C), 165.40, 134.29, 133.23, 133.15, 131.91, 130.22, 129.84, 129.76, 129.37, 126.56 (t,  $J$  = 21.8 Hz, C), 117.58 (q,  $J$  = 318.8 Hz, OSO<sub>2</sub>CF<sub>3</sub>), 125.00 – 100.00 (m, CF<sub>2</sub>CF<sub>2</sub>CF<sub>3</sub>), 61.55, 61.35, 14.25, 14.25; **<sup>19</sup>F NMR** (282 MHz, CDCl<sub>3</sub>, 300 K):  $\delta$  (ppm) = -74.51 (s, 3F), -80.32 (t,  $J$  = 10.5 Hz, 3F), -103.93 (q,  $J$  = 11.3 Hz, 2F), -122.37 – -122.50 (m, 2F); **HRMS** (ESI)  $m/z$  = 663.0506, calcd. for C<sub>24</sub>H<sub>18</sub>F<sub>10</sub>O<sub>7</sub>SNa [M+Na]<sup>+</sup>, found: 663.0506; **IR** (neat, cm<sup>-1</sup>): 2988<sub>w</sub>, 1723<sub>s</sub>, 1662<sub>w</sub>, 1611<sub>w</sub>, 1427<sub>w</sub>, 1408<sub>w</sub>, 1369<sub>w</sub>, 1345<sub>w</sub>, 1272<sub>s</sub>, 1225<sub>s</sub>, 1208<sub>s</sub>, 1183<sub>s</sub>, 1136<sub>s</sub>, 1104<sub>s</sub>, 1025<sub>m</sub>, 1005<sub>w</sub>, 987<sub>w</sub>, 883<sub>m</sub>, 852<sub>m</sub>, 835<sub>m</sub>, 796<sub>w</sub>, 770<sub>m</sub>, 746<sub>w</sub>, 711<sub>m</sub>, 677<sub>w</sub>, 602<sub>m</sub>, 567<sub>w</sub>.

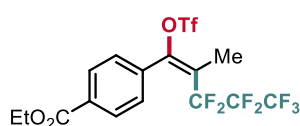

**Ethyl (E)-4-(3,3,4,4,5,5,5-heptafluoro-2-methyl-1-(((trifluoromethyl)sulfonyl)oxy)pent-1-en-1-yl)benzoate (3s):**

The title compound was prepared according to general procedure **GP2** with CuCl (1.0 mg, 10  $\mu$ mol, 10 mol%), ethyl 4-(prop-1-yn-1-

yl)benzoate **1s** (18.8 mg, 0.100 mmol, 1.0 equiv), and phenyl(perfluoropropyl)iodonium triflate **2a** (88.8 mg, 0.170 mmol, 1.7 equiv) in DCE (1 mL) at 50 °C for 15 h. Purification via silica gel chromatography (pentane:EtOAc = 200:1) gave the desired product **3s** as a colorless oil in 95% yield (48.2 mg). **TLC**  $R_f$  = 0.6 (pentane:EtOAc = 40:1); **<sup>1</sup>H NMR** (300 MHz, CDCl<sub>3</sub>, 300 K):  $\delta$  (ppm) = 8.01 (d,  $J$  = 8.5 Hz, 2H), 7.39 (d,  $J$  = 8.2 Hz, 2H), 4.33 (q,  $J$  = 7.1 Hz, 2H), 2.12 (s, 3H), 1.33 (t,  $J$  = 7.1 Hz, 3H); **<sup>13</sup>C NMR** (75 MHz, CDCl<sub>3</sub>, 300 K):  $\delta$  (ppm) = 165.53, 151.14 (t,  $J$  = 4.8 Hz, C), 134.84, 132.68, 129.88, 129.19, 122.97 (t,  $J$  = 22.0 Hz, C), 117.94 (q,  $J$  = 318.4 Hz, OSO<sub>2</sub>CF<sub>3</sub>), 120.00 – 100.00 (m, CF<sub>2</sub>CF<sub>2</sub>CF<sub>3</sub>), 61.44, 14.22, 13.48 (p,  $J$  = 3.5 Hz, C); **<sup>19</sup>F NMR** (282 MHz, CDCl<sub>3</sub>, 300 K):  $\delta$  (ppm) = -74.33 (s, 3F), -80.50 (t,  $J$  = 10.1 Hz, 3F), -107.26 (q,  $J$  = 10.1 Hz, 2F), -124.31 – -124.45 (m, 2F); **HRMS** (ESI)  $m/z$  = 529.0138, calcd. for C<sub>16</sub>H<sub>12</sub>F<sub>10</sub>O<sub>5</sub>SNa [M+Na]<sup>+</sup>, found: 529.0172; **IR** (neat, cm<sup>-1</sup>): 2992w, 1726m, 1679w, 1423m, 1370w, 1348w, 1273s, 1207s, 1182s, 1137s, 1104s, 1120s, 1024s, 972m, 938w, 912s, 867s, 840s, 783w, 759m, 740m, 710m, 672s, 631w, 602s, 579w.

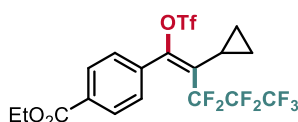

**Ethyl (E)-4-(2-cyclopropyl-3,3,4,4,5,5,5-heptafluoro-1-(((trifluoromethyl)sulfonyl)oxy)pent-1-en-1-yl)benzoate (**3t**):** The title compound was prepared according to general

procedure **GP2** with CuCl (1.0 mg, 10  $\mu$ mol, 10 mol%), ethyl 4-(cyclopropylethynyl)benzoate **1t** (21.4 mg, 0.100 mmol, 1.0 equiv), and phenyl(perfluoropropyl)iodonium triflate **2a** (88.8 mg, 0.170 mmol, 1.7 equiv) in DCE (1 mL) at 50 °C for 15 h. Purification via silica gel chromatography (pentane:EtOAc = 200:1) gave the desired product **3t** as a colorless oil in 64% yield (34.1 mg). **TLC**  $R_f$  = 0.5 (pentane:EtOAc = 40:1); **<sup>1</sup>H NMR** (300 MHz, CDCl<sub>3</sub>, 300 K):  $\delta$  (ppm) = 8.00 (d,  $J$  = 8.5 Hz, 2H), 7.35 (d,  $J$  = 8.1 Hz, 2H), 4.32 (q,  $J$  = 7.1 Hz, 2H), 1.58 (tt,  $J^1$  = 8.4 Hz,  $J^2$  = 5.7 Hz, 1H), 1.33 (t,  $J$  = 7.1 Hz, 3H), 1.07 – 1.00 (m, 2H), 0.92 – 0.86 (m, 2H); **<sup>13</sup>C NMR** (75 MHz, CDCl<sub>3</sub>, 300 K):  $\delta$  (ppm) = 165.55, 154.28 (t,  $J$  = 4.5 Hz, 1C), 135.47, 132.51, 129.56, 129.19, 127.13 (t,  $J$  = 20.1 Hz, C), 117.94 (q,  $J$  = 318.5 Hz, OSO<sub>2</sub>CF<sub>3</sub>), 125.00 – 100.00 (m, CF<sub>2</sub>CF<sub>2</sub>CF<sub>3</sub>), 61.43, 14.23, 9.78 (p,  $J$  = 2.8 Hz, C), 7.65; **<sup>19</sup>F NMR**

(282 MHz, CDCl<sub>3</sub>, 300 K):  $\delta$  (ppm) = -74.43 (s, 3F), -80.46 (t,  $J$  = 10.9 Hz, 3F), -103.20 – -103.37 (m, 2F), -123.23 – -123.37 (m, 2F); **HRMS** (ESI)  $m/z$  = 555.0294, calcd. for C<sub>18</sub>H<sub>14</sub>F<sub>10</sub>O<sub>5</sub>SNa [M+Na]<sup>+</sup>, found: 555.0287; **IR** (neat, cm<sup>-1</sup>): 2988w, 1724m, 1424m, 1347w, 1274s, 1210s, 1183s, 1138s, 1113s, 1045w, 1023w, 983m, 954w, 904w, 875s, 856m, 835m, 760w, 745w, 708w, 603m.

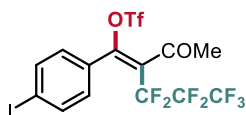

**(E)-2-Acetyl-3,3,4,4,5,5,5-heptafluoro-1-(4-iodophenyl)pent-1-en-1-yl trifluoromethanesulfonate (3u):**

The title compound was prepared according to general procedure **GP2** with CuCl (1.0 mg, 10  $\mu$ mol, 10 mol%), 4-(4-iodophenyl)but-3-yn-2-one **1u** (27.0 mg, 0.100 mmol, 1.0 equiv), and phenyl(perfluoropropyl)iodonium triflate **2a** (88.8 mg, 0.170 mmol, 1.7 equiv) in DCE (1 mL) at 50 °C for 15 h. Purification via silica gel chromatography (pentane:EtOAc = 200:1) gave the desired product **3u** as a white solid in 43% yield (25.5 mg). **MP**: 55 °C; **TLC**  $R_f$  = 0.6 (pentane:EtOAc = 20:1); **<sup>1</sup>H NMR** (300 MHz, CDCl<sub>3</sub>, 300 K):  $\delta$  (ppm) = 7.78 (d,  $J$  = 8.5 Hz, 2H), 7.14 (d,  $J$  = 8.5 Hz, 2H), 1.95 (s, 3H); **<sup>13</sup>C NMR** (75 MHz, CDCl<sub>3</sub>, 300 K):  $\delta$  (ppm) = 193.08, 152.43 (t,  $J$  = 5.9 Hz, C), 138.59, 130.87, 129.13, 124.88 – 124.23 (m, C), 117.94 (q,  $J$  = 318.9 Hz, OSO<sub>2</sub>CF<sub>3</sub>), 125.00 – 100.00 (m, CF<sub>2</sub>CF<sub>2</sub>CF<sub>3</sub>), 100.00, 31.35; **<sup>19</sup>F NMR** (282 MHz, CDCl<sub>3</sub>, 300 K):  $\delta$  (ppm) = -73.24 (s, 3F), -80.19 – -80.29 (m, 3F), -106.88 – -106.98 (m, 2F), -124.48 – -124.53 (m, 2F); **HRMS** (ESI)  $m/z$  = 610.8842, calcd. for C<sub>14</sub>H<sub>7</sub>F<sub>10</sub>IO<sub>4</sub>SNa [M+Na]<sup>+</sup>, found: 610.8854; **IR** (neat, cm<sup>-1</sup>): 2922w, 2854w, 1720m, 1645w, 1584w, 1483w, 1420m, 1395m, 1345m, 1287m, 1213s, 1131s, 1117w, 1062m, 1010m, 991s, 960w, 900m, 836m, 804s, 756s, 747s, 731m, 708m, 675m, 662m, 626m, 602s.

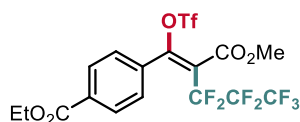

**Ethyl (E)-4-(3,3,4,4,5,5,5-heptafluoro-2-(methoxycarbonyl)pent-1-en-1-yl)-1-(((trifluoromethyl)sulfonyl)oxy)benzoate (3v):**

The title compound was prepared according to general procedure **GP2** with CuCl (1.0 mg, 10  $\mu$ mol, 10 mol%), ethyl 4-(3-methoxy-3-oxoprop-1-yn-1-yl)benzoate **1v** (23.2 mg, 0.100 mmol, 1.0 equiv), and phenyl(perfluoropropyl)iodonium triflate **2a** (88.8 mg, 0.170 mmol, 1.7 equiv) in DCE

(1 mL) at 50 °C for 15 h. Then further portions of CuCl (1.0 mg, 10 µmol, 10 mol%), phenyl(perfluoropropyl)iodonium triflate **2a** (88.8 mg, 0.170 mmol, 1.7 equiv) and DCE (1 mL) were added. The stirring was continued at 50 °C for further 15 h. Purification via silica gel chromatography (pentane:EtOAc = 200:1) gave the desired product **3v** as a colorless oil in 64% yield (35.3 mg). **TLC**  $R_f$  = 0.5 (pentane:EtOAc = 20:1); **<sup>1</sup>H NMR** (300 MHz, CDCl<sub>3</sub>, 300 K): δ (ppm) = 8.06 (d,  $J$  = 8.7 Hz, 2H), 7.48 (d,  $J$  = 8.2 Hz, 2H), 4.34 (q,  $J$  = 7.1 Hz, 2H), 3.89 (s, 3H), 1.34 (t,  $J$  = 7.1 Hz, 3H); **<sup>13</sup>C NMR** (75 MHz, CDCl<sub>3</sub>, 300 K): δ (ppm) = 165.22, 159.97 (t,  $J$  = 3.2 Hz, 1C), 155.02 (t,  $J$  = 5.2 Hz, 1C), 133.71, 132.52, 129.74, 129.35, 117.86 (q,  $J$  = 318.8 Hz, OSO<sub>2</sub>CF<sub>3</sub>), 125.00 – 100.00 (m, CF<sub>2</sub>CF<sub>2</sub>CF<sub>3</sub>), 61.63, 53.74, 14.21; **<sup>19</sup>F NMR** (282 MHz, CDCl<sub>3</sub>, 300 K): δ (ppm) = -73.93 (s, 3F), -80.30 (t,  $J$  = 10.2 Hz, 3F), -104.13 (q,  $J$  = 10.2 Hz, 2F), -123.79 – -123.88 (m, 2F); **HRMS** (ESI)  $m/z$  = 573.0046, calcd. for C<sub>17</sub>H<sub>12</sub>F<sub>10</sub>O<sub>7</sub>SNa [M+Na]<sup>+</sup>, found: 573.0046; **IR** (neat, cm<sup>-1</sup>): 2851w, 2361w, 1753m, 1726m, 1667w, 1431m, 1370w, 1347w, 1274s, 1212s, 1134s, 1119s, 1105s, 1063m, 1023m, 992m, 961m, 898w, 865s, 798s, 761m, 703w, 677w, 601s.

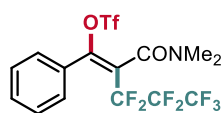

**(E)-2-(Dimethylcarbamoyl)-3,3,4,4,5,5,5-heptafluoro-1-phenyl pent-1-en-1-yl trifluoromethanesulfonate (3w):** The title compound was prepared according to general procedure **GP2**

with CuCl (1.0 mg, 10 µmol, 10 mol%), *N,N*-dimethyl-3-phenylpropiolamide **1w** (17.3 mg, 0.100 mmol, 1.0 equiv), and phenyl(perfluoropropyl)iodonium triflate **2a** (88.8 mg, 0.170 mmol, 1.7 equiv) in DCE (1 mL) at 50 °C for 15 h. Then further portions of CuCl (1.0 mg, 10 µmol, 10 mol%), phenyl(perfluoropropyl)iodonium triflate **2a** (88.8 mg, 0.170 mmol, 1.7 equiv) and DCE (1 mL) were added. The stirring was continued at 50 °C for further 15 h. Purification via silica gel chromatography (pentane:EtOAc = 80:1) gave the desired product **3w** as a colorless oil in 64% yield (31.6 mg). **TLC**  $R_f$  = 0.65 (pentane:EtOAc = 10:1); **<sup>1</sup>H NMR** (300 MHz, CDCl<sub>3</sub>, 300 K): δ (ppm) = 7.50 – 7.34 (m, 5H), 3.12 (s, 3H), 3.01 (s, 3H); **<sup>13</sup>C NMR** (75 MHz, CDCl<sub>3</sub>, 300 K): δ (ppm) = 159.36, 153.23 – 152.07 (m, 2C), 131.90, 129.77, 129.02, 128.25, 117.86 (q,  $J$  = 318.7 Hz, OSO<sub>2</sub>CF<sub>3</sub>), 125.00 – 100.00 (m, CF<sub>2</sub>CF<sub>2</sub>CF<sub>3</sub>), 38.00, 34.79; **<sup>19</sup>F NMR** (282 MHz,

CDCl<sub>3</sub>, 300 K):  $\delta$  (ppm) = -74.35 (s, 3F), -80.32 (t,  $J$  = 10.8 Hz, 3F), -100.18 – -101.33 (m, 1F), -104.50 – -105.58 (m, 1F), -123.42 – -123.53 (m, 2F); **HRMS** (ESI)  $m/z$  = 514.0141, calcd. for C<sub>15</sub>H<sub>11</sub>F<sub>10</sub>NO<sub>4</sub>SNa [M+Na]<sup>+</sup>, found: 514.0137; **IR** (neat, cm<sup>-1</sup>): 2932<sub>w</sub>, 2360<sub>w</sub>, 1658<sub>m</sub>, 1497<sub>w</sub>, 1423<sub>w</sub>, 1344<sub>w</sub>, 1275<sub>w</sub>, 1212<sub>s</sub>, 1195<sub>s</sub>, 1162<sub>m</sub>, 1133<sub>s</sub>, 1115<sub>s</sub>, 1047<sub>w</sub>, 978<sub>w</sub>, 944<sub>w</sub>, 864<sub>s</sub>, 835<sub>w</sub>, 801<sub>m</sub>, 765<sub>w</sub>, 748<sub>w</sub>, 697<sub>m</sub>, 603<sub>m</sub>, 558<sub>w</sub>.

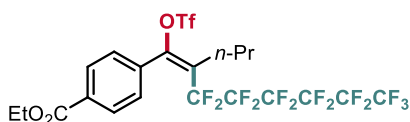

**Ethyl (E)-4-(3,3,4,4,5,5,6,6,7,7,8,8,8-tridecafluoro-2-propyl-1-(((trifluoromethyl)sulfonyl)oxy)oct-1-en-1-yl)benzoate (3x):** The title compound

was prepared according to general procedure **GP2** with CuCl (1.0 mg, 10  $\mu$ mol, 10 mol%), ethyl 4-(pent-1-yn-1-yl)benzoate **1a** (21.6 mg, 0.100 mmol, 1.0 equiv), and phenyl(perfluorohexyl)iodonium triflate **2c** (144 mg, 0.170 mmol, 1.7 equiv) in DCE (1 mL) at 50 °C for 15 h. Purification via silica gel chromatography (pentane:EtOAc = 200:1, then 150:1) gave the desired product **3x** as a colorless oil in 94% yield (64.1 mg). **TLC**  $R_f$  = 0.5 (pentane:EtOAc = 40:1); **<sup>1</sup>H NMR** (300 MHz, CDCl<sub>3</sub>, 300 K):  $\delta$  (ppm) = 8.00 (d,  $J$  = 8.5 Hz, 2H), 7.40 (d,  $J$  = 8.1 Hz, 2H), 4.32 (q,  $J$  = 7.2 Hz, 2H), 2.40 – 2.35 (m, 2H), 1.72 – 1.59 (m, 2H), 1.33 (t,  $J$  = 7.1 Hz, 3H), 0.98 (t,  $J$  = 7.3 Hz, 3H); **<sup>13</sup>C NMR** (75 MHz, CDCl<sub>3</sub>, 300 K):  $\delta$  (ppm) = 165.55, 151.90 (t,  $J$  = 5.6 Hz, 1C), 134.78, 132.67, 130.19, 129.10, 127.49 (t,  $J$  = 21.4 Hz), 117.94 (q,  $J$  = 320.5 Hz, OSO<sub>2</sub>CF<sub>3</sub>), 125.00 – 100.00 (m, CF<sub>2</sub>CF<sub>2</sub>CF<sub>2</sub>CF<sub>2</sub>CF<sub>2</sub>CF<sub>3</sub>), 61.44, 30.05, 22.39, 14.20, 14.11; **<sup>19</sup>F NMR** (282 MHz, CDCl<sub>3</sub>, 300 K):  $\delta$  (ppm) = -74.45 (3F), -80.94 (tt,  $J^1$  = 10.3 Hz,  $J^2$  = 3.0 Hz, 3F), -105.41 – -105.55 (m, 2F), -119.44 – -119.56 (m, 2F), -121.92 (br, 2F), -122.82 (br, 2F), -126.14 – -126.28 (m, 2F); **HRMS** (ESI)  $m/z$  = 707.0355, calcd. for C<sub>21</sub>H<sub>16</sub>F<sub>16</sub>O<sub>5</sub>SNa [M+Na]<sup>+</sup>, found: 707.0447; **IR** (neat, cm<sup>-1</sup>): 2981<sub>w</sub>, 2884<sub>w</sub>, 2849<sub>w</sub>, 1727<sub>m</sub>, 1668<sub>w</sub>, 1611<sub>w</sub>, 1423<sub>m</sub>, 1407<sub>w</sub>, 1366<sub>w</sub>, 1275<sub>m</sub>, 1211<sub>s</sub>, 1136<sub>s</sub>, 1104<sub>s</sub>, 1023<sub>w</sub>, 967<sub>m</sub>, 893<sub>w</sub>, 866<sub>m</sub>, 844<sub>m</sub>, 809<sub>m</sub>, 791<sub>m</sub>, 736<sub>m</sub>, 709<sub>m</sub>, 689<sub>m</sub>, 602<sub>s</sub>.

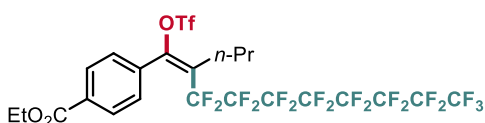

**Ethyl (E)-4-(3,3,4,4,5,5,6,6,7,7,8,8,9,9,10,10,10-heptadecafluoro-2-propyl-1-(((trifluoromethyl)sulfonyl)oxy)dec-1-en-1-yl)benzoate (3y):** The title compound

was prepared according to general procedure **GP2** with CuCl

(1.0 mg, 10  $\mu$ mol, 10 mol%), ethyl 4-(pent-1-yn-1-yl)benzoate **1a** (21.6 mg, 0.100 mmol, 1.0 equiv), and phenyl(perfluorooctyl)iodonium triflate **2d** (1.31 g, 0.170 mmol, 1.7 equiv) in DCE (1 mL) at 50 °C for 15 h. Purification via silica gel chromatography (pentane:EtOAc = 300:1, then 250:1) gave the desired product **3y** as a colorless oil in 81% yield (63.6 mg). **TLC**  $R_f$  = 0.6 (pentane:EtOAc = 40:1);  **$^1\text{H}$  NMR** (300 MHz,  $\text{CDCl}_3$ , 300 K):  $\delta$  (ppm) =  $\delta$  8.00 (d,  $J$  = 8.4 Hz, 2H), 7.40 (d,  $J$  = 8.1 Hz, 2H), 4.32 (q,  $J$  = 7.1 Hz, 2H), 2.40 – 2.35 (m, 2H), 1.72 – 1.59 (m, 2H), 1.33 (t,  $J$  = 7.1 Hz, 3H), 0.98 (t,  $J$  = 7.3 Hz, 3H);  **$^{13}\text{C}$  NMR** (75 MHz,  $\text{CDCl}_3$ , 300 K):  $\delta$  (ppm) = 165.54 (d,  $J$  = 1.6 Hz, C), 151.86 (d,  $J$  = 5.5 Hz, 1C), 134.79, 132.67, 130.18, 129.09, 127.50 (t,  $J$  = 21.4 Hz, C), 117.94 (q,  $J$  = 320.4 Hz,  $\text{OSO}_2\text{CF}_3$ ), 125.00 – 100.00 (m,  $\text{CF}_2\text{CF}_2\text{CF}_2\text{CF}_2\text{CF}_2\text{CF}_2\text{CF}_2\text{CF}_3$ ), 61.43 (d,  $J$  = 1.9 Hz), 30.04, 22.38, 14.18 (d,  $J$  = 3.5 Hz, 1C), 14.08 (d,  $J$  = 4.4 Hz, C);  **$^{19}\text{F}$  NMR** (282 MHz,  $\text{CDCl}_3$ , 300 K):  $\delta$  (ppm) = -74.40 – -76.60 (m, 3F), -80.85 – -81.16 (m, 3F), -105.50 (br, 2F), -119.50 (br, 2F), -121.67 – -122.04 (m, 6F), -122.85 (br, 2F), -126.28 (br, 2F); **HRMS** (ESI)  $m/z$  = 807.0291, calcd. for  $\text{C}_{23}\text{H}_{16}\text{F}_{20}\text{O}_5\text{SNa}$   $[\text{M}+\text{Na}]^+$ , found: 807.0300; **IR** (neat,  $\text{cm}^{-1}$ ): 2983w, 1728w, 1668w, 1611w, 1423m, 1369w, 1275m, 1243s, 1206s, 1135s, 1104s, 1057w, 1024w, 978w, 950m, 905w, 866m, 839m, 821m, 790w, 735w, 709m, 692w, 659w, 603m, 558w.

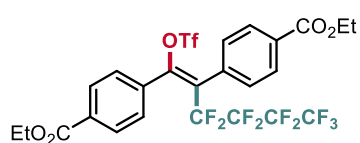

**Diethyl 4,4'-(3,3,4,4,5,5,6,6,6-nonafluoro-1-(((trifluoromethyl)sulfonyl)oxy)hex-1-ene-1,2-diyl)(E)-dibenzoate (**3z**):** The title compound was prepared according to

general procedure **GP2** with  $\text{CuCl}$  (1.0 mg, 10  $\mu$ mol, 10 mol%), diethyl 4,4'-(ethyne-1,2-diyl)dibenzoate **1r** (32.2 mg, 0.100 mmol, 1.0 equiv), and phenyl(perfluorobutyl)iodonium triflate **2b** (97.2 mg, 0.170 mmol, 1.7 equiv) in DCE (1 mL) at 50 °C for 15 h. Then further portions of  $\text{CuCl}$  (1.0 mg, 10  $\mu$ mol, 10 mol%), phenyl(perfluorobutyl)iodonium triflate **2b** (97.2 mg, 0.170 mmol, 1.7 equiv) and DCE (1 mL) were added. The stirring was continued at 50 °C for further 15 h. Purification via silica gel chromatography (pentane:EtOAc = 200:1, then 150:1) gave the desired product **3z** as an off-white solid in 55% yield (37.7 mg). **MP**: 78 °C; **TLC**  $R_f$  = 0.4

(pentane:EtOAc = 20:1); **<sup>1</sup>H NMR** (300 MHz, CDCl<sub>3</sub>, 300 K): δ (ppm) = δ 8.12 – 8.05 (m, 4H), 7.56 (d, *J* = 8.2 Hz, 2H), 7.44 (d, *J* = 8.1 Hz, 2H), 4.35 (q, *J* = 7.1 Hz, 2H), 4.34 (q, *J* = 7.1 Hz, 2H), 1.35 (t, *J* = 7.1 Hz, 3H), 1.34 (t, *J* = 7.1 Hz, 3H); **<sup>13</sup>C NMR** (75 MHz, CDCl<sub>3</sub>, 300 K): δ (ppm) = 165.70, 165.40, 152.71 (t, *J* = 4.3 Hz, C), 134.31, 133.23, 133.15, 131.92, 130.24, 129.82, 129.76, 129.38, 126.79 (t, *J* = 21.9 Hz, C), 117.58 (q, *J* = 318.8 Hz, OSO<sub>2</sub>CF<sub>3</sub>), 125.00 – 100.00 (m, CF<sub>2</sub>CF<sub>2</sub>CF<sub>2</sub>CF<sub>3</sub>) 61.54, 61.34, 14.24, 14.24; **<sup>19</sup>F NMR** (282 MHz, CDCl<sub>3</sub>, 300 K): δ (ppm) = -74.53 (s, 3F), -80.79 – -81.06 (m, 3F), -103.42 (t, *J* = 15.1 Hz, 2F), -118.81 – -118.90 (m, 2F), -125.86 – -126.02 (m, 2F); **HRMS** (ESI) *m/z* = 713.0474, calcd. for C<sub>25</sub>H<sub>18</sub>F<sub>12</sub>O<sub>7</sub>SNa [M+Na]<sup>+</sup>, found: 713.0488; **IR** (neat, cm<sup>-1</sup>): 2988w, 2363w, 1722s, 1661w, 1612w, 1571w, 1427m, 1408m, 1369m, 1352w, 1272s, 1209s, 1182s, 1134s, 1103s, 1068w, 1022s, 997m, 946w, 912w, 879m, 863m, 820s, 769s, 739s, 710s, 691m, 605s.

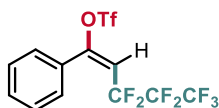

**(E)-3,3,4,4,5,5,5-Heptafluoro-1-phenylpent-1-en-1-yl trifluoro**

**methanesulfonate (3aa):** The title compound was prepared according to general procedure **GP2** with CuCl (1.0 mg, 10 μmol,

10 mol%), ethynylbenzene **1aa** (10.2 mg, 0.100 mmol, 1.0 equiv), and phenyl(perfluoropropyl)iodonium triflate **2a** (78.3 mg, 0.150 mmol, 1.5 equiv) in DCE (1 mL) at room temperature for 24 h. The desired product **3aa** could not be separated from the perfluoropropylated by-products resulting from arene perfluoroalkylation. The yield (51%) is based on <sup>19</sup>F NMR analysis with PhCF<sub>3</sub> as internal standard. **TLC** *R<sub>f</sub>* = 0.75 (pentane); **<sup>19</sup>F NMR** (282 MHz, CDCl<sub>3</sub>, 300 K): δ (ppm) = -73.68 (s, 3F), -80.19 (t, *J* = 9.0 Hz, 3F), -106.91 (q, *J* = 9.2 Hz, 2F), -127.18 – -127.27 (m, 2F); **EI-MS** (*m/z*, relative intensity): 420 (M<sup>+</sup>, 9), 271 (7), 237 (10), 171 (18), 151 (14), 140 (11), 119 (10), 105 (13), 91 (11), 77 (21), 69 (100), 51 (11).

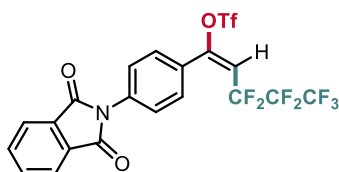

**(E)-1-(4-(1,3-Dioxoisindolin-2-yl)phenyl)-3,3,4,4,5,5,5-heptafluoropent-1-en-1-yl trifluoromethanesulfo**

**nate (3ab):** The title compound was prepared according to general procedure **GP2** with CuCl (1.0 mg, 10 μmol,

10 mol%), 2-(4-ethynylphenyl)isoindoline-1,3-dione **1ab** (24.7 mg, 0.100 mmol, 1.0

equiv), and phenyl(perfluoropropyl)iodonium triflate **2a** (78.3 mg, 0.150 mmol, 1.5 equiv) in DCE (1 mL) at room temperature for 24 h. Purification via silica gel chromatography (Pentane:Aceton = 7:1) gave the desired product **3ab** as a white solid in 72% yield (40.5 mg). **MP**: 116 °C; **TLC**  $R_f$  = 0.3 (pentane:acetone = 7:1); **<sup>1</sup>H NMR** (300 MHz, CDCl<sub>3</sub>, 300 K):  $\delta$  (ppm) = 7.99 (dd,  $J^1$  = 5.5 Hz,  $J^2$  = 3.1 Hz, 2H), 7.83 (dd,  $J^1$  = 5.5 Hz,  $J^2$  = 3.0 Hz, 2H), 7.70 (d,  $J$  = 8.7 Hz, 2H), 7.64 (d,  $J$  = 8.7 Hz, 2H), 6.10 (t,  $J$  = 13.0 Hz, 1H); **<sup>13</sup>C NMR** (75 MHz, CDCl<sub>3</sub>, 300 K):  $\delta$  (ppm) = 166.60, 156.44 (t,  $J$  = 4.6 Hz, C), 135.27, 134.76, 131.49, 129.84 (t,  $J$  = 2.5 Hz, C), 128.61, 125.68, 124.00, 118.31 (q,  $J$  = 318.6 Hz, OSO<sub>2</sub>CF<sub>3</sub>), 110.52 (t,  $J$  = 23.2 Hz, C), 125.00–100.00 (m, CF<sub>2</sub>CF<sub>2</sub>CF<sub>3</sub>); **<sup>19</sup>F NMR** (282 MHz, CDCl<sub>3</sub>, 300 K):  $\delta$  (ppm) = -73.53 (s, 3F), -80.13 (t,  $J$  = 9.2 Hz, 3F), -106.80 (q,  $J$  = 9.3 Hz, 2F), -127.13 – -127.21 (m, 2F); **HRMS** (ESI)  $m/z$  = 587.9934, calcd. for C<sub>20</sub>H<sub>9</sub>F<sub>10</sub>NO<sub>5</sub>SNa [M+Na]<sup>+</sup>, found: 587.9951; **IR** (neat, cm<sup>-1</sup>): 2363w, 1742w, 1715s, 1606w, 1515w, 1424m, 1374m, 1279w, 1212s, 1183m, 1138s, 1120s, 1096m, 1080m, 1026w, 1003w, 953w, 907s, 884m, 866m, 830w, 789w, 792s, 716s, 687w, 651w, 667w, 627w, 602m.

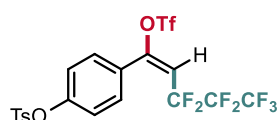

**(E)-4-(3,3,4,4,5,5,5-Heptafluoro-1-(((trifluoromethyl)sulfonyl)oxy)pent-1-en-1-yl)phenyl 4-methylbenzenesulfonate (3ac):** The title compound was

prepared according to general procedure **GP2** with CuCl (1.0 mg, 10  $\mu$ mol, 10 mol%), 4-ethynylphenyl 4-methylbenzenesulfonate **1ac** (27.2 mg, 0.100 mmol, 1.0 equiv), and phenyl(perfluoropropyl)iodonium triflate **2a** (78.3 mg, 0.150 mmol, 1.5 equiv) in DCE (1 mL) at room temperature for 24 h. Purification via PTCL (pentane:acetone = 15:1) gave the desired product **3ac** as a colorless oil in 82% yield (48.4 mg). **TLC**  $R_f$  = 0.35 (pentane:acetone = 20:1); **<sup>1</sup>H NMR** (300 MHz, CDCl<sub>3</sub>, 300 K):  $\delta$  (ppm) = 7.59 (d,  $J$  = 8.2 Hz, 2H), 7.35 (d,  $J$  = 8.5 Hz, 2H), 7.22 (d,  $J$  = 8.1 Hz, 2H), 7.03 (d,  $J$  = 8.7 Hz, 2H), 5.97 (t,  $J$  = 13.0 Hz, 1H), 2.36 (s, 3H); **<sup>13</sup>C NMR** (75 MHz, CDCl<sub>3</sub>, 300 K):  $\delta$  (ppm) = 155.90 (t,  $J$  = 5.0 Hz, C), 152.06, 145.91, 131.80, 130.77 (t,  $J$  = 2.8 Hz, C), 129.82, 128.50, 128.41, 122.70, 118.22 (q,  $J$  = 318.7 Hz, OSO<sub>2</sub>CF<sub>3</sub>), 110.97 (t,  $J$  = 23.5 Hz, C), 125.00–100.00 (m, CF<sub>2</sub>CF<sub>2</sub>CF<sub>3</sub>). 21.61; **<sup>19</sup>F NMR** (282 MHz, CDCl<sub>3</sub>, 300 K):  $\delta$  (ppm)

= -73.59 – -73.62 (m, 3F), -80.24 – -80.30 (m, 3F), -107.03 (q,  $J = 8.5$  Hz, 2F), -127.21 – -127.23 (m, 2F); **HRMS** (ESI)  $m/z = 612.9808$ , calcd. for  $C_{19}H_{12}F_{10}O_6S_2Na [M+Na]^+$ , found: 612.9830; **IR** (neat,  $cm^{-1}$ ): 3091 $w$ , 1681 $w$ , 1601 $w$ , 1503 $w$ , 1429 $m$ , 1381 $m$ , 1203 $s$ , 1158 $s$ , 1179 $s$ , 1137 $s$ , 1117 $s$ , 1092 $s$ , 1021 $w$ , 992 $m$ , 957 $m$ , 862 $s$ , 814 $m$ , 759 $m$ , 735 $m$ , 694 $m$ , 655 $m$ , 600 $m$ , 581 $m$ .

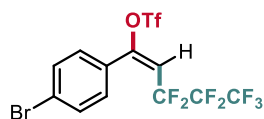

**(E)-1-(4-Bromophenyl)-3,3,4,4,5,5,5-heptafluoropent-1-en-1-yl trifluoromethanesulfonate (3ad):** The title compound was prepared according to general procedure **GP2**

with CuCl (1.0 mg, 10  $\mu$ mol, 10 mol%), 1-bromo-4-ethynylbenzene **1ad** (18.1 mg, 0.100 mmol, 1.0 equiv), and phenyl(perfluoropropyl)iodonium triflate **2a** (78.3 mg, 0.150 mmol, 1.5 equiv) in DCE (1 mL) at room temperature for 24 h. Purification via silica gel chromatography (pentane) gave the desired product **3ad** as a colorless oil in 60% yield (29.7 mg). **TLC**  $R_f = 0.6$  (pentane);  **$^1H$  NMR** (300 MHz,  $CDCl_3$ , 300 K):  $\delta$  (ppm) = 7.55 (dt,  $J^1 = 9.0$  Hz,  $J^2 = 2.3$  Hz, 2H), 7.29 (d,  $J = 8.5$  Hz, 2H), 5.98 (t,  $J = 13.0$  Hz, 1H);  **$^{13}C$  NMR** (75 MHz,  $CDCl_3$ , 300 K):  $\delta$  (ppm) = 156.22 (t,  $J = 4.9$  Hz, 1C), 131.99, 130.55 (t,  $J = 2.7$  Hz, 1C), 128.63, 126.91, 118.27 (q,  $J = 318.7$  Hz,  $OSO_2CF_3$ ), 110.79 (t,  $J = 23.5$  Hz, 1C), 125.00 – 100.00 (m,  $CF_2CF_2CF_3$ );  **$^{19}F$  NMR** (282 MHz,  $CDCl_3$ , 300 K):  $\delta$  (ppm) = -73.59 (s, 3F), -80.13 – -80.24 (m, 3F), -106.98 (q,  $J = 8.5$  Hz, 2F), -127.18 – -127.25 (m,  $J = 8.0$  Hz, 2F); **HRMS** (EI)  $m/z = 497.89831$ , calcd. for  $C_{12}H_5BrF_{10}O_3S [M]^+$ , found: 497.89886; **IR** (neat,  $cm^{-1}$ ): 3101 $w$ , 2920 $w$ , 1680 $w$ , 1592 $w$ , 1490 $w$ , 1431 $m$ , 1398 $w$ , 1366 $s$ , 1350 $w$ , 1209 $s$ , 1182 $s$ , 1137 $s$ , 1117 $s$ , 1096 $m$ , 1073 $m$ , 1018 $m$ , 991 $s$ , 956 $m$ , 856 $s$ , 787 $w$ , 756 $m$ , 731 $m$ , 720 $m$ , 665 $w$ , 660 $s$ , 559 $w$ .

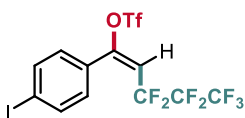

**(E)-3,3,4,4,5,5,5-Heptafluoro-1-(4-iodophenyl)pent-1-en-1-yl trifluoromethanesulfonate (3ae):** The title compound was prepared according to general procedure **GP2** with CuCl (1.0

mg, 10  $\mu$ mol, 10 mol%), 1-ethynyl-4-iodobenzene **1ae** (22.8 mg, 0.100 mmol, 1.0 equiv), and phenyl(perfluoropropyl)iodonium triflate **2a** (78.3 mg, 0.150 mmol, 1.5 equiv) in DCE (1 mL) at room temperature for 24 h. Purification via silica gel

chromatography (pentane) gave the desired product **3ae** as a colorless oil in 60% yield (32.9 mg). **TLC**  $R_f$  = 0.75 (pentane);  **$^1\text{H}$  NMR** (300 MHz,  $\text{CDCl}_3$ , 300 K):  $\delta$  (ppm) = 7.75 (d,  $J$  = 8.4 Hz, 2H), 7.14 (d,  $J$  = 8.4 Hz, 2H), 5.97 (t,  $J$  = 13.0 Hz, 1H);  **$^{13}\text{C}$  NMR** (75 MHz,  $\text{CDCl}_3$ , 300 K):  $\delta$  (ppm) = 156.39 (t,  $J$  = 4.8 Hz, C), 137.92, 130.41 (t,  $J$  = 2.5 Hz, C), 118.27 (q,  $J$  = 320.7 Hz,  $\text{OSO}_2\text{CF}_3$ ), 110.71 (t,  $J$  = 23.5 Hz, C), 129.20, 125.00 – 100.00 (m,  $\text{CF}_2\text{CF}_2\text{CF}_3$ ), 99.11;  **$^{19}\text{F}$  NMR** (282 MHz,  $\text{CDCl}_3$ , 300 K):  $\delta$  (ppm) = -73.61 (s, 3F), -80.23 (t,  $J$  = 9.0 Hz, 3F), -106.98 (q,  $J$  = 9.6 Hz, 2F), -127.23 – -127.27 (m, 2F); **HRMS** (ESI)  $m/z$  = 568.8737, calcd. for  $\text{C}_{12}\text{H}_5\text{F}_{10}\text{IO}_3\text{SNa}$   $[\text{M}+\text{Na}]^+$ , found: 568.8723; **IR** (neat,  $\text{cm}^{-1}$ ): 3097w, 1680w, 1587w, 1486w, 1430m, 1394w, 1350w, 1210s, 1183s, 1137s, 1116s, 1061w, 1014m, 990s, 951m, 855s, 787w, 755m, 731w, 718w, 668w, 598s.

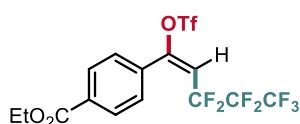

**Ethyl (E)-4-(3,3,4,4,5,5,5-heptafluoro-1-(((trifluoromethyl)sulfonyl)oxy)pent-1-en-1-yl)benzoate (**3af**)**: The title compound was prepared according to general procedure **GP2**

with  $\text{CuCl}$  (1.0 mg, 10  $\mu\text{mol}$ , 10 mol%), ethyl 4-ethynylbenzoate **1af** (17.4 mg, 0.100 mmol, 1.0 equiv), and phenyl(perfluoropropyl)iodonium triflate **2a** (88.8 mg, 0.170 mmol, 1.7 equiv) in DCE (1 mL) at 50  $^\circ\text{C}$  for 15 h. Purification via PTLC (pentane:acetone = 40:1) gave the desired product **3af** as a slight yellow oil in 65% yield (31.9 mg). **TLC**  $R_f$  = 0.6 (pentane:EtOAc = 40:1);  **$^1\text{H}$  NMR** (300 MHz,  $\text{CDCl}_3$ , 300 K):  $\delta$  (ppm) = 8.07 (d,  $J$  = 8.6 Hz, 2H), 7.50 (d,  $J$  = 8.9 Hz, 2H), 6.03 (t,  $J$  = 13.0 Hz, 1H), 4.34 (q,  $J$  = 7.1 Hz, 2H), 1.34 (t,  $J$  = 7.1 Hz, 3H);  **$^{13}\text{C}$  NMR** (75 MHz,  $\text{CDCl}_3$ , 300 K):  $\delta$  (ppm) = 165.29, 156.20 (t,  $J$  = 5.0 Hz, 1C), 137.90, 133.59 (d,  $J$  = 1.5 Hz, 1C), 129.62, 129.18, 118.26 (q,  $J$  = 318.5 Hz,  $\text{OSO}_2\text{CF}_3$ ), 111.29 (t,  $J$  = 23.7 Hz, 1C), 125.00 – 100.00 (m,  $\text{CF}_2\text{CF}_2\text{CF}_3$ ), 61.57, 14.24;  **$^{19}\text{F}$  NMR** (282 MHz,  $\text{CDCl}_3$ , 300 K):  $\delta$  (ppm) = -73.54 (s, 3F), -80.21 (t,  $J$  = 9.3 Hz, 3F), -107.06 (q,  $J$  = 9.4 Hz, 2F), -127.13 – -127.21 (m, 2F); **HRMS** (ESI)  $m/z$  = 514.9981, calcd. for  $\text{C}_{15}\text{H}_{10}\text{F}_{10}\text{O}_5\text{SNa}$   $[\text{M}+\text{Na}]^+$ , found: 514.9975; **IR** (neat,  $\text{cm}^{-1}$ ): 2999w, 1724m, 1682w, 1431m, 1369w, 1351w, 1275s, 1245s, 1210s, 1182s, 1138s, 1104s, 1024m, 994s, 955m, 872s, 843m, 779w, 759m, 733m, 706s, 599s.

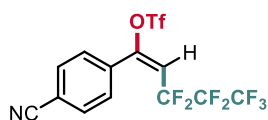

**(E)-1-(4-Cyanophenyl)-3,3,4,4,5,5,5-heptafluoropent-1-en-1-yl trifluoromethanesulfonate (3ag):** The title compound was prepared according to general procedure **GP2**

with CuCl (1.0 mg, 10  $\mu$ mol, 10 mol%), 4-ethynylbenzonitrile **1ag** (12.7 mg, 0.100 mmol, 1.0 equiv), and phenyl(perfluoropropyl)iodonium triflate **2a** (88.8 mg, 0.170 mmol, 1.7 equiv) in DCE (1 mL) at 50  $^{\circ}$ C for 15 h. Purification via PTLC (pentane:EtOAc = 20:1) gave the desired product **3ag** as a colorless oil in 34% yield (15.1 mg). **TLC**  $R_f$  = 0.5 (pentane:EtOAc = 20:1);  **$^1\text{H}$  NMR** (300 MHz,  $\text{CDCl}_3$ , 300 K):  $\delta$  (ppm) = 7.71 (d,  $J$  = 8.4 Hz, 2H), 7.55 (d,  $J$  = 8.2 Hz, 2H), 6.08 (t,  $J$  = 13.0 Hz, 1H);  **$^{13}\text{C}$  NMR** (75 MHz,  $\text{CDCl}_3$ , 300 K):  $\delta$  (ppm) = 154.88 (t,  $J$  = 5.1 Hz, C), 133.88, 132.31, 129.83 (t,  $J$  = 2.5 Hz, C), 118.23 (q,  $J$  = 318.7 Hz,  $\text{OSO}_2\text{CF}_3$ ), 117.36, 112.19 (t,  $J$  = 24.0 Hz, C), 115.91, 125.00 – 100.00 (m,  $\text{CF}_2\text{CF}_2\text{CF}_3$ );  **$^{19}\text{F}$  NMR** (282 MHz,  $\text{CDCl}_3$ , 300 K):  $\delta$  (ppm) = -73.33 (s, 3F), -80.13 (t,  $J$  = 9.2 Hz, 3F), -107.07 (q,  $J$  = 9.4 Hz, 2F), -127.04 – -127.12 (m, 2F); **HRMS** (ESI)  $m/z$  = 467.9723, calcd. for  $\text{C}_{13}\text{H}_5\text{F}_{10}\text{NO}_3\text{SNa}$   $[\text{M}+\text{Na}]^+$ , found: 467.9722; **IR** (neat,  $\text{cm}^{-1}$ ): 2920w, 2237w, 1682w, 1505w, 1432m, 1351w, 1212s, 1182s, 1136s, 1117s, 1025w, 997s, 956m, 861s, 828w, 786w, 758m, 732s, 668w, 660s, 566m.

#### Spectral data of follow-up products 4, 5, 6, 7

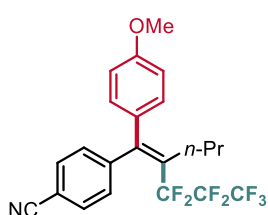

**(E)-4-(3,3,4,4,5,5,5-Heptafluoro-1-(4-methoxyphenyl)-2-propylpent-1-en-1-yl)benzonitrile (4):** **TLC**  $R_f$  = 0.50 (pentane:EtOAc = 20:1);  **$^1\text{H}$  NMR** (300 MHz,  $\text{CDCl}_3$ , 300 K):  $\delta$  (ppm) = 7.45 (d,  $J$  = 8.5 Hz, 2H), 7.16 (d,  $J$  = 8.6 Hz, 2H), 6.98 (d,  $J$  = 8.7 Hz, 2H), 6.79 (d,  $J$  = 8.8 Hz, 2H), 3.70 (s, 3H), 2.21 – 2.15 (m, 2H), 1.34 (tq,  $J^1$  = 7.8 Hz,  $J^2$  = 7.2 Hz, 2H), 0.67 (t,  $J$  = 7.3 Hz, 3H);  **$^{13}\text{C}$  NMR** (75 MHz,  $\text{CDCl}_3$ , 300 K):  $\delta$  (ppm) = 159.22, 149.53 (t,  $J$  = 4.9 Hz, C), 146.15, 133.15, 131.43, 128.79, 128.62, 118.61, 114.27, 110.92, 125.00 – 100.00 (m,  $\text{CF}_2\text{CF}_2\text{CF}_3$ ), 55.19, 31.60, 22.95, 14.02;  **$^{19}\text{F}$  NMR** (282 MHz,  $\text{CDCl}_3$ , 300 K):  $\delta$  (ppm) = -80.45 (t,  $J$  = 10.2 Hz, 3F), -103.90 (q,  $J$  = 10.0 Hz, 2F), -123.93 – -124.08 (m, 2F); **HRMS** (ESI)  $m/z$  = 468.1169, calcd. for  $\text{C}_{22}\text{H}_{18}\text{F}_7\text{NONa}$   $[\text{M}+\text{Na}]^+$ , found: 468.1176; **IR** (neat,  $\text{cm}^{-1}$ ):

2965w, 2876w, 2842w, 2230w, 1605m, 1509m, 1467w, 1345m, 1289w, 1247s, 1223s, 1195s, 1174s, 1129m, 1107s, 1061w, 1033m, 951w, 926m, 874w, 843w, 828m, 806w, 767w, 748m, 691m, 573s.

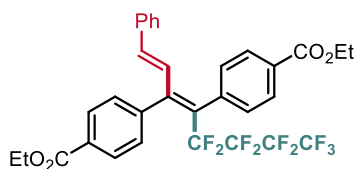

**Diethyl 4,4'-((1E,3Z)-5,5,6,6,7,7,8,8,8-nonafluoro-1-phenylocta-1,3-diene-3,4-diyl)dibenzoate (5):** MP > 105 °C decomp.;  $R_f$  = 0.45 (pentane:EtOAc = 20:1);  $^1\text{H}$  NMR (300 MHz,  $\text{CDCl}_3$ , 300 K):  $\delta$  (ppm) = 8.08 (d,  $J$  =

12.6 Hz, 2H), 8.06 (d,  $J$  = 12.5 Hz, 2H), 7.44 (d,  $J$  = 8.0 Hz, 2H), 7.29 (d,  $J$  = 8.0 Hz, 2H), 7.15 – 7.04 (m, 3H), 7.02 – 6.82 (m, 2H), 6.58 (d,  $J$  = 15.9 Hz, 1H), 5.87 (d,  $J$  = 15.9 Hz, 1H), 4.36 (q,  $J$  = 7.1 Hz, 2H), 4.35 (q,  $J$  = 7.1 Hz, 2H), 1.36 (t,  $J$  = 7.1 Hz, 3H), 1.36 (t,  $J$  = 7.1 Hz, 3H);  $^{13}\text{C}$  NMR (75 MHz,  $\text{CDCl}_3$ , 300 K):  $\delta$  (ppm) = 166.34, 166.16, 148.60 (t,  $J$  = 4.3 Hz, C), 141.45, 139.28, 138.66, 135.68, 131.55, 130.83, 129.95, 129.54, 129.04, 128.93, 128.66, 128.37, 127.16, 126.65 (t,  $J$  = 19.9 Hz, C), 125.00 – 100.00 (m,  $\text{CF}_2\text{CF}_2\text{CF}_2\text{CF}_3$ ), 61.26, 61.12, 14.32, 14.32;  $^{19}\text{F}$  NMR (282 MHz,  $\text{CDCl}_3$ , 300 K):  $\delta$  (ppm) = -81.01 (t,  $J$  = 9.7 Hz, 3F), -101.30 (t,  $J$  = 14.8 Hz, 3F), -118.24 (q,  $J$  = 9.1 Hz, 2F), -125.94 – -126.11 (m, 2F); HRMS (ESI)  $m/z$  = 667.1501, calcd. For  $\text{C}_{32}\text{H}_{25}\text{F}_9\text{O}_4\text{Na}$   $[\text{M}+\text{Na}]^+$ , found: 667.1511; IR (neat,  $\text{cm}^{-1}$ ): 2983w, 1717s, 1608w, 1580w, 1449w, 1406w, 1368w, 1351w, 1310w, 1270s, 1232s, 1204s, 1174s, 1133s, 1101s, 1083m, 1022m, 966w, 954w, 935w, 912w, 889m, 850w, 825w, 800w, 768w, 757w, 726m, 714s, 693m, 638w.

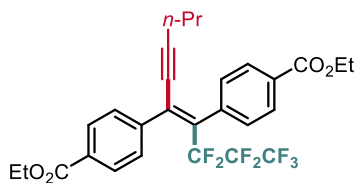

**Diethyl 4,4'-((1,1,1,2,2,3,3-heptafluorodec-4-en-6-yn-4,5-diyl)(E)-dibenzoate (6):** MP: 91 °C;  $R_f$  = 0.5 (pentane:EtOAc = 20:1);  $^1\text{H}$  NMR (300 MHz,  $\text{CDCl}_3$ , 300 K):  $\delta$  (ppm) = 8.02 (d,  $J$  = 8.3 Hz, 2H), 7.98 (d,  $J$  =

8.3 Hz, 2H), 7.45 (d,  $J$  = 8.2 Hz, 2H), 7.35 (d,  $J$  = 8.2 Hz, 2H), 4.34 (q,  $J$  = 7.1 Hz, 2H), 4.32 (q,  $J$  = 7.1 Hz, 2H), 1.96 (t,  $J$  = 6.9 Hz, 2H), 1.34 (t,  $J$  = 7.1 Hz, 3H), 1.33 (t,  $J$  = 7.1 Hz, 3H), 1.12 (tq,  $J^1$  = 7.2 Hz,  $J^2$  = 7.2 Hz, 2H), 0.54 (t,  $J$  = 7.4 Hz, 3H);  $^{13}\text{C}$  NMR (75 MHz,  $\text{CDCl}_3$ , 300 K):  $\delta$  (ppm) = 166.18, 166.12, 142.17, 139.67 (t,  $J$  = 2.9 Hz, C), 135.61 (t,  $J$  = 4.8 Hz, C), 132.90 (t,  $J$  = 20.2 Hz, C), 130.60, 130.14, 129.24, 129.19,

127.61 (t,  $J = 3.1$  Hz, C), 105.54, 125.00 – 100.00 (m, CF<sub>2</sub>CF<sub>2</sub>CF<sub>3</sub>), 80.47 (t,  $J = 2.6$  Hz, C), 61.09, 61.04, 21.58, 21.29, 14.29, 13.00; **<sup>19</sup>F NMR** (282 MHz, CDCl<sub>3</sub>, 300 K):  $\delta$  (ppm) = -80.38 (t,  $J = 10.5$  Hz, 3F), -102.61 – -102.70 (m, 2F), -122.13 – -122.27 (m, 2F); **HRMS** (ESI)  $m/z$  = 581.1533, calcd. For C<sub>28</sub>H<sub>25</sub>F<sub>7</sub>O<sub>4</sub>Na [M+Na]<sup>+</sup>, found: 581.1547; **IR** (neat, cm<sup>-1</sup>): 2970w, 2937w, 2875w, 2214w, 1718s, 1610w, 1407w, 1368w, 1345m, 1310w, 1270s, 1227s, 1213s, 1178s, 1147m, 1100s, 1021m, 996m, 911w, 879w, 836w, 769w, 741m, 713s, 638w.

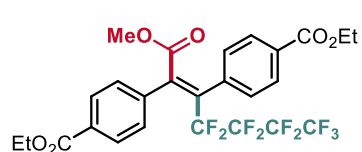

**Diethyl 4,4'-(4,4,5,5,6,6,7,7,7-nonafluoro-1-methoxy-1-oxohept-2-ene-2,3-diyl)(E)-dibenzoate (7):** MP: 109 °C;  $R_f$  = 0.4 (pentane:EtOAc = 10:1); **<sup>1</sup>H NMR** (300 MHz, CDCl<sub>3</sub>, 300 K):  $\delta$  (ppm) = 8.01 (d,  $J = 8.2$  Hz, 4H), 7.42 (d,  $J = 8.1$  Hz, 4H), 4.33 (q,  $J = 7.1$  Hz, 2H), 4.32 (q,  $J = 7.1$  Hz, 2H), 3.28 (s, 3H), 1.34 (t,  $J = 7.1$  Hz, 3H), 1.33 (t,  $J = 7.1$  Hz, 3H); **<sup>13</sup>C NMR** (75 MHz, CDCl<sub>3</sub>, 300 K):  $\delta$  (ppm) = 166.40, 165.93, 165.86, 145.97 (t,  $J = 4.2$  Hz), 137.35, 136.97, 131.34, 130.95, 130.27, 129.30, 129.24, 127.80, 125.00 – 100.00 (m, CF<sub>2</sub>CF<sub>2</sub>CF<sub>2</sub>CF<sub>3</sub>), 61.26, 61.18, 52.58, 14.28, 14.28; **<sup>19</sup>F NMR** (282 MHz, CDCl<sub>3</sub>, 300 K):  $\delta$  (ppm) = -81.01 (t,  $J = 9.7$  Hz, 3F), -103.98 (t,  $J = 14.1$  Hz, 2F), -118.96 (tt,  $J^1 = 12.5$  Hz,  $J^2 = 6.5$  Hz, 2F), -125.90 – -126.11 (m, 2F); **HRMS** (ESI)  $m/z$  = 623.1087, calcd. For C<sub>26</sub>H<sub>21</sub>F<sub>9</sub>O<sub>6</sub>Na [M+Na]<sup>+</sup>, found: 623.1096; **IR** (neat, cm<sup>-1</sup>): 2988w, 1722s, 1610w, 1435w, 1407w, 1369w, 1354w, 1311w, 1273s, 1235s, 1219s, 1180m, 1135s, 1104s, 1022m, 897w, 814w, 774w, 744w, 712w.

### Spectral data of pentafluorinated Tamoxifen 8

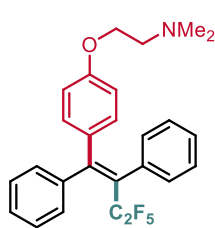

**(E)-N,N-dimethyl-2-(4-(3,3,4,4,4-pentafluoro-1,2-diphenylbut-1-en-1-yl)phenoxy)ethan-1-amine (8):**  $R_f$  = 0.3 (DCM:MeOH = 10:1); **<sup>1</sup>H NMR** (300 MHz, CDCl<sub>3</sub>, 300 K):  $\delta$  (ppm) = 7.30 – 7.19 (m, 2H), 7.17 – 7.10 (m, 4H), 6.72 (d,  $J = 8.8$  Hz, 6H), 6.47 (d,  $J = 8.8$  Hz, 2H), 3.85 (t,  $J = 5.6$  Hz, 2H), 2.59 (t,  $J = 5.5$  Hz, 2H), 2.23 (s, 6H); **<sup>13</sup>C NMR** (75 MHz, CDCl<sub>3</sub>, 300 K):  $\delta$  (ppm) = 157.69, 152.72 – 152.44 (m, C), 141.10, 135.42, 134.16, 131.78, 130.91, 127.92, 127.86, 127.76, 127.68, 127.30, 113.65, 130.00 – 100.00 (m, CF<sub>2</sub>CF<sub>3</sub>), 65.63, 58.09, 45.73; **<sup>19</sup>F NMR** (282 MHz, CDCl<sub>3</sub>, 300 K):  $\delta$  (ppm)

= -80.76 (t,  $J = 3.1$  Hz, 3F), -104.92 (s, 2F); **HRMS** (EI)  $m/z = 462.1851$ , calcd. for  $\text{C}_{26}\text{H}_{25}\text{F}_5\text{NO}^+$   $[\text{M}+\text{H}]^+$ , found: 462.1844; **IR** (neat,  $\text{cm}^{-1}$ ): 2974 $w$ , 2943 $w$ , 2934 $w$ , 2825 $w$ , 2775 $w$ , 1606 $w$ , 1509 $m$ , 1466 $w$ , 1445 $w$ , 1325 $w$ , 1287 $w$ , 1208 $s$ , 1196 $s$ , 1158 $m$ , 1109 $w$ , 1077 $w$ , 1046 $m$ , 1029 $m$ , 965 $w$ , 912 $w$ , 840 $w$ , 760 $w$ , 724 $w$ , 705 $m$ , 671 $w$ .

## 7. Spectra

### Spectra of alkynes 1

#### $^1\text{H}$ NMR Spectrum of *N,N*-diethyl-4-(pent-1-yn-1-yl)benzamide 1d

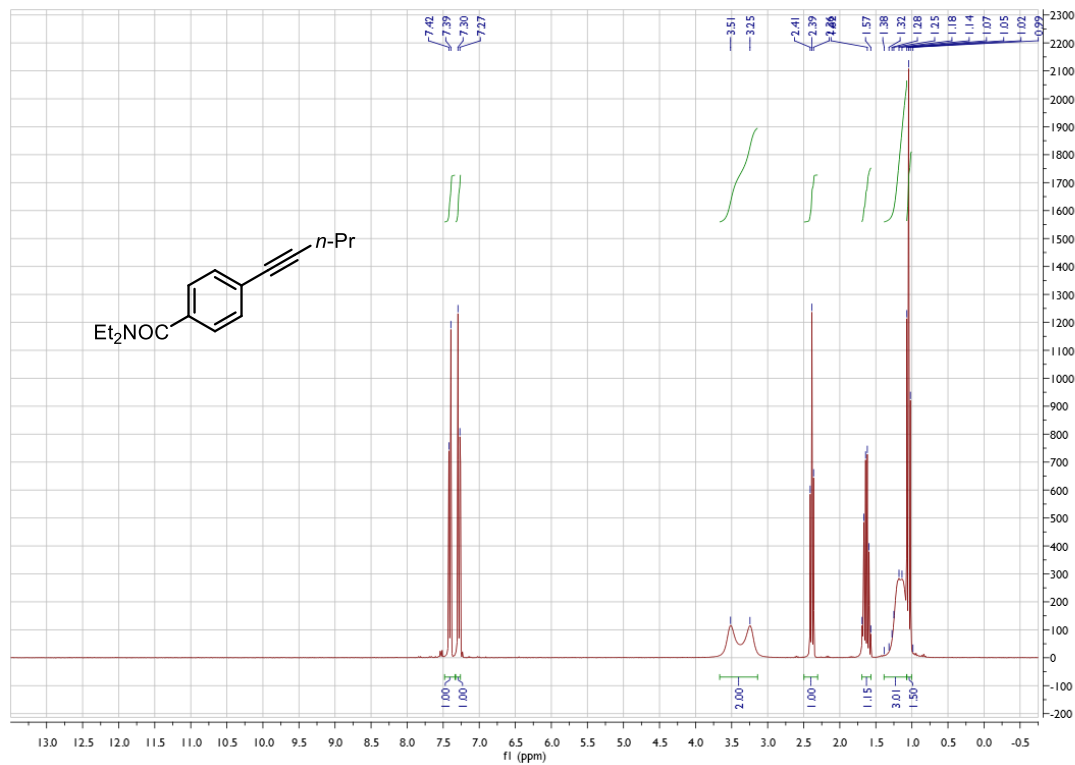

#### $^{13}\text{C}$ NMR Spectrum of *N,N*-diethyl-4-(pent-1-yn-1-yl)benzamide 1d

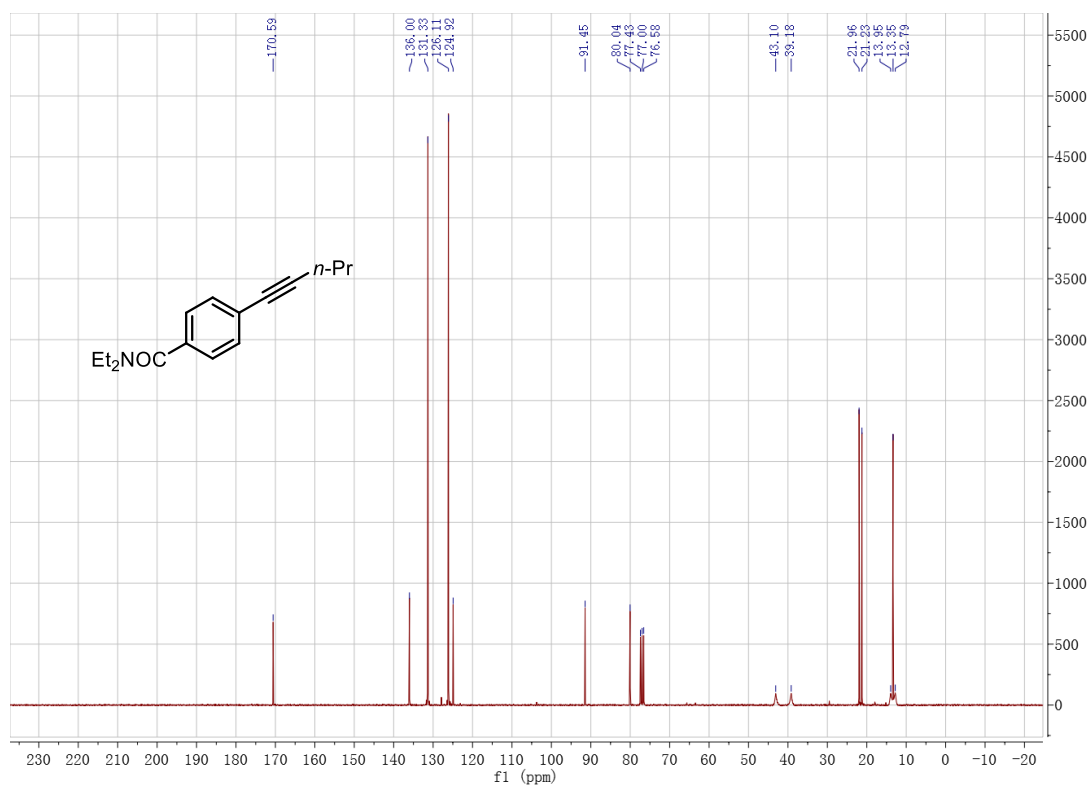

# <sup>1</sup>H NMR Spectrum of 1-(Methylsulfonyl)-4-(pent-1-yn-1-yl)benzene 1e

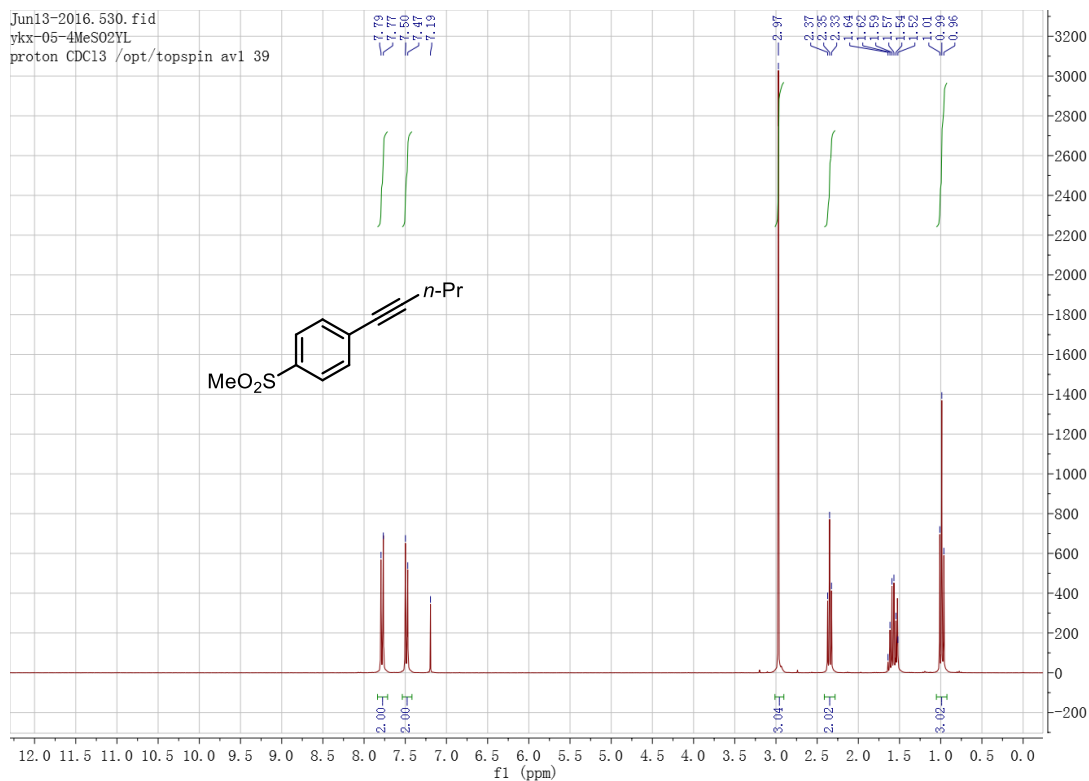

# <sup>13</sup>C NMR Spectrum of 1-(Methylsulfonyl)-4-(pent-1-yn-1-yl)benzene 1e

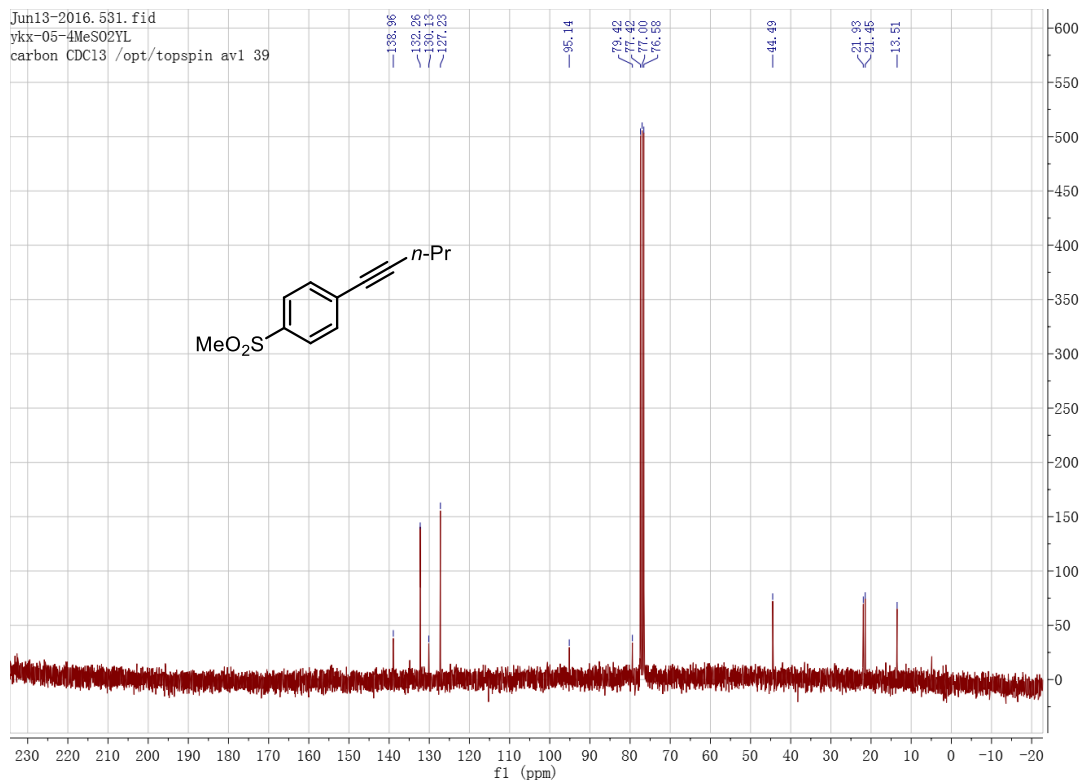

**<sup>1</sup>H NMR Spectrum of 4-(Pent-1-yn-1-yl)phenyl 4-methylbenzenesulfonate **1i**:**

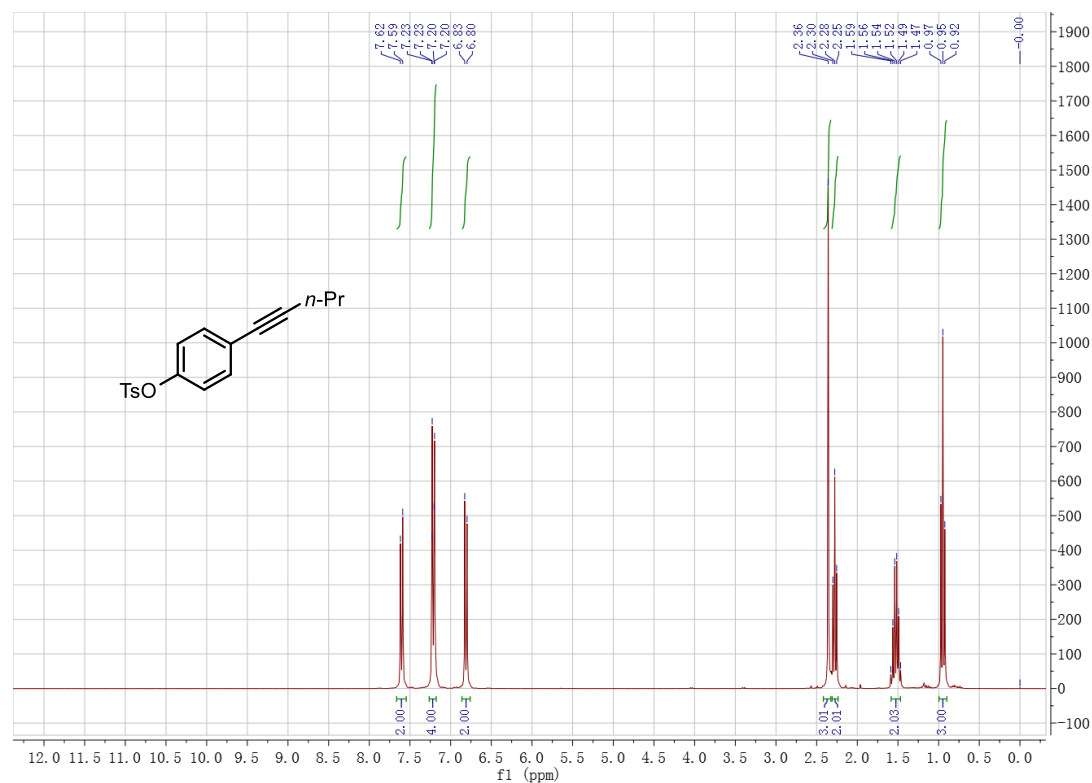

**<sup>13</sup>C NMR Spectrum of 4-(Pent-1-yn-1-yl)phenyl 4-methylbenzenesulfonate **1i**:**

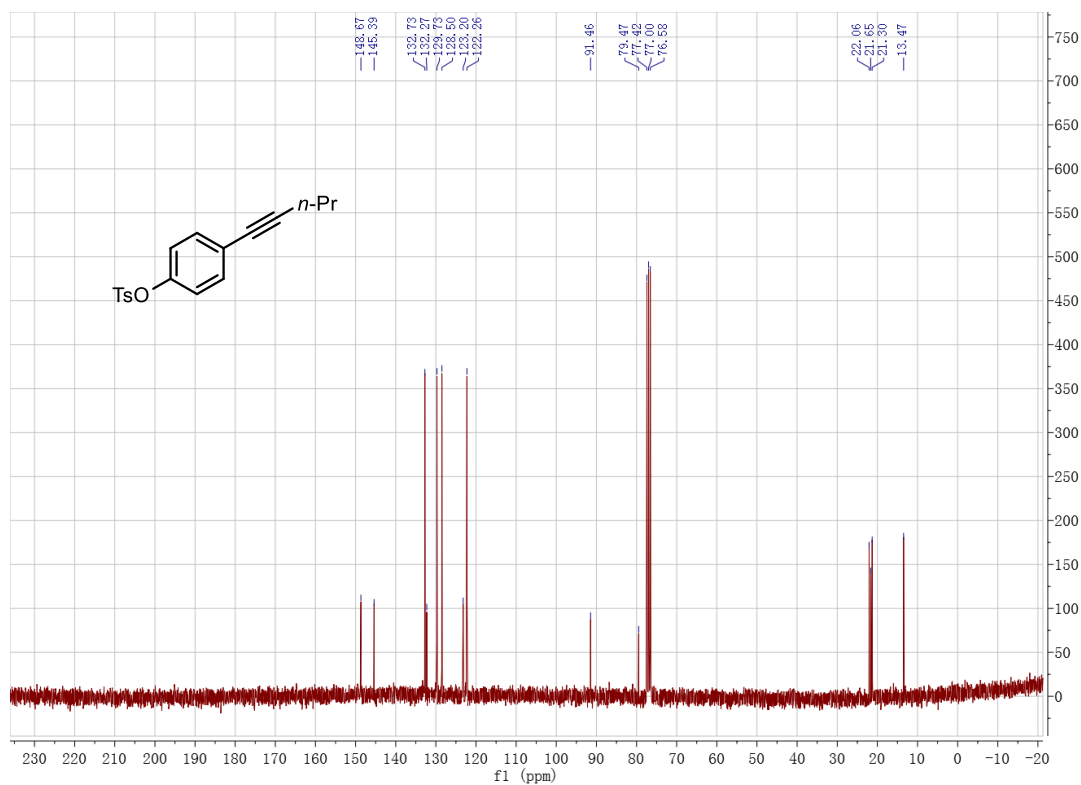

# <sup>1</sup>H NMR Spectrum of 1-Iodo-3-(pent-1-yn-1-yl)benzene 1j

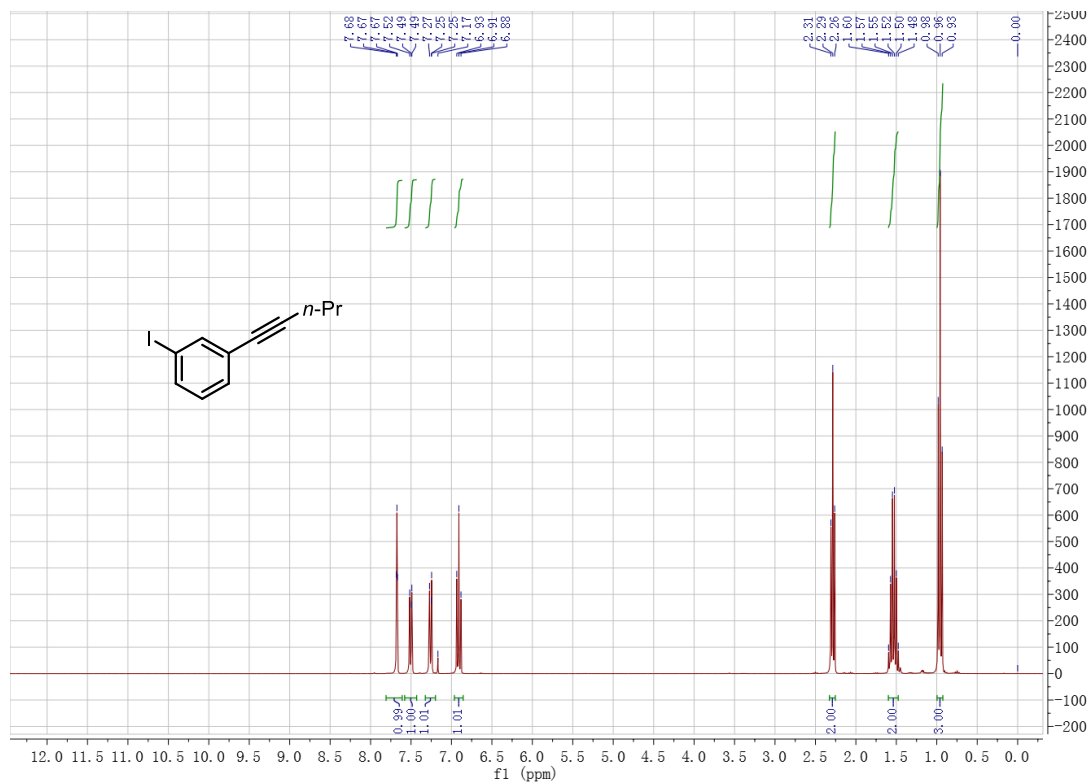

# <sup>13</sup>C NMR Spectrum of 1-Iodo-3-(pent-1-yn-1-yl)benzene 1j

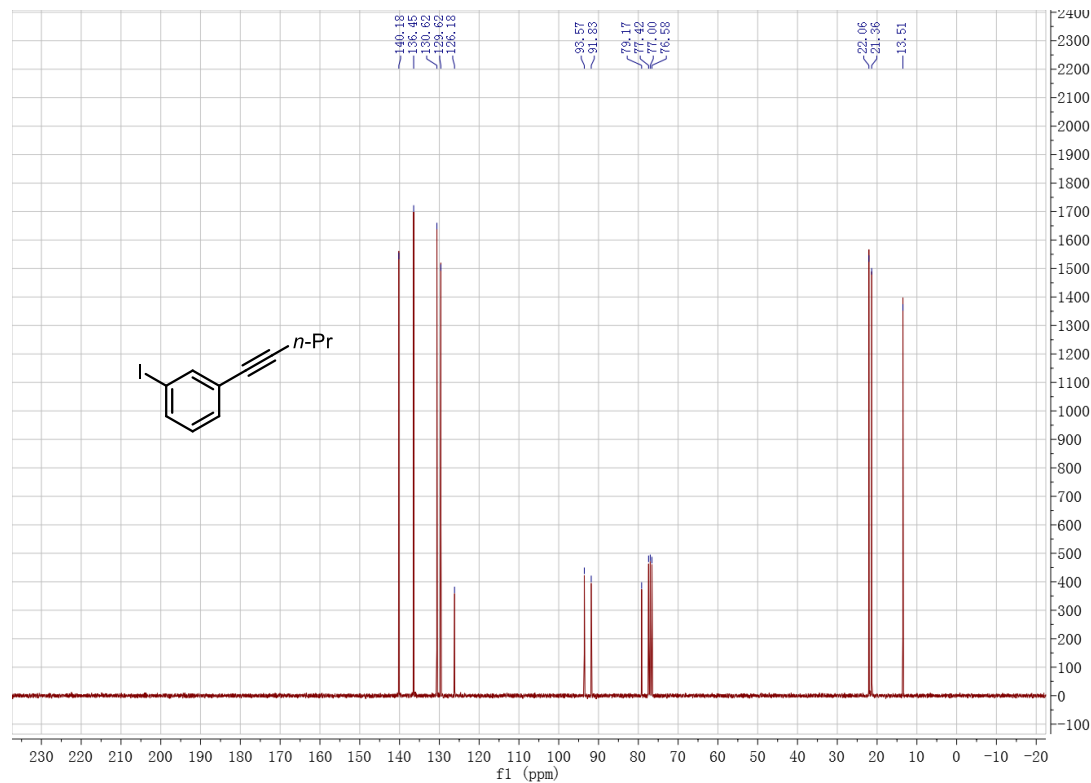

# <sup>1</sup>H NMR Spectrum of 1,3-Dibromo-5-(pent-1-yn-1-yl)benzene 1n

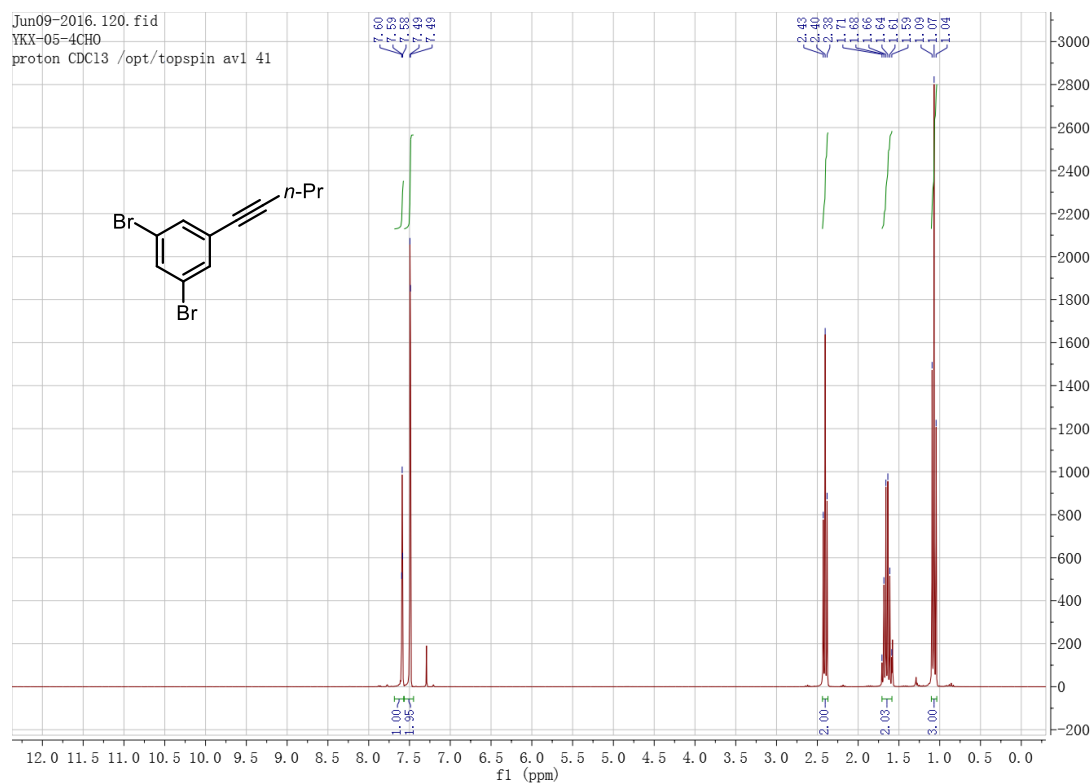

# <sup>13</sup>C NMR Spectrum of 1,3-Dibromo-5-(pent-1-yn-1-yl)benzene 1n

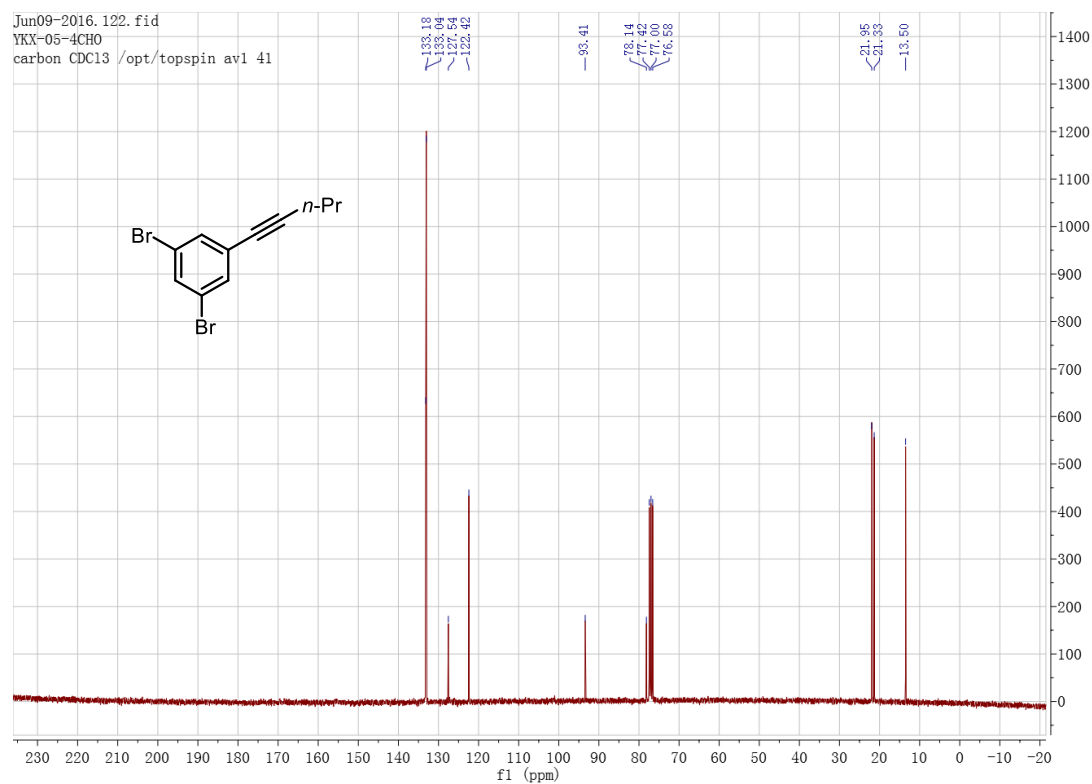

# <sup>1</sup>H NMR Spectrum of 3-Bromo-5-(pent-1-yn-1-yl)pyridine 1o

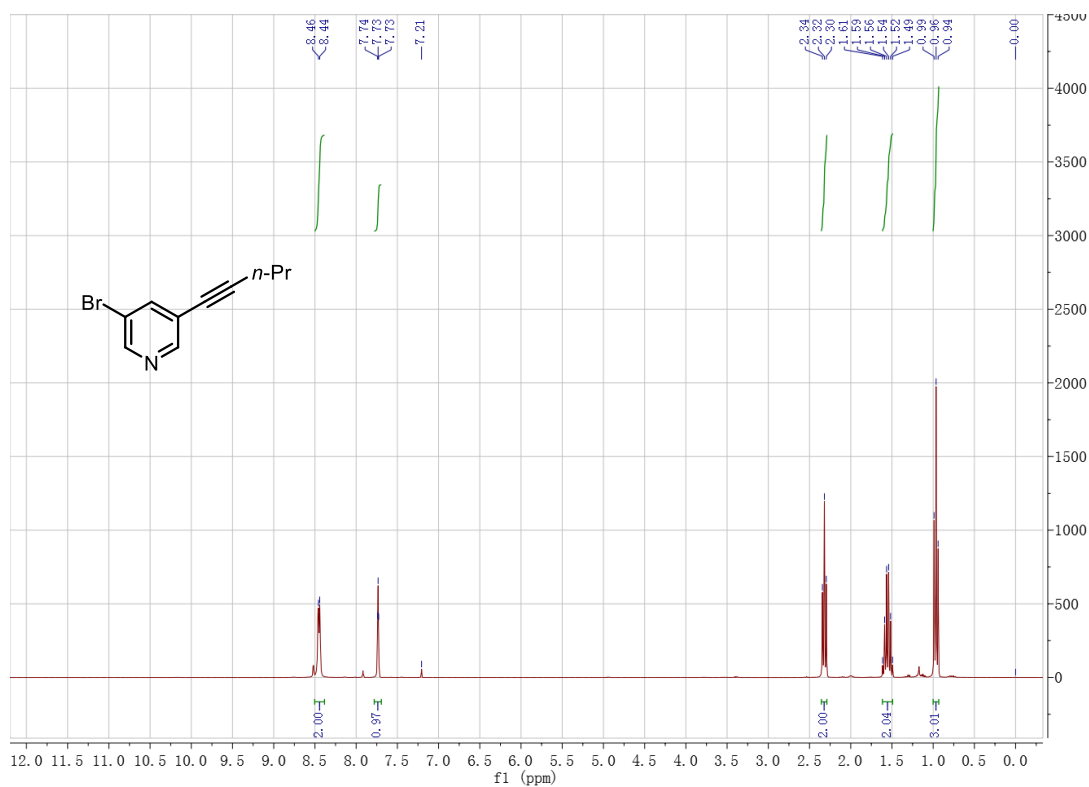

# <sup>13</sup>C NMR Spectrum of 3-Bromo-5-(pent-1-yn-1-yl)pyridine 1o

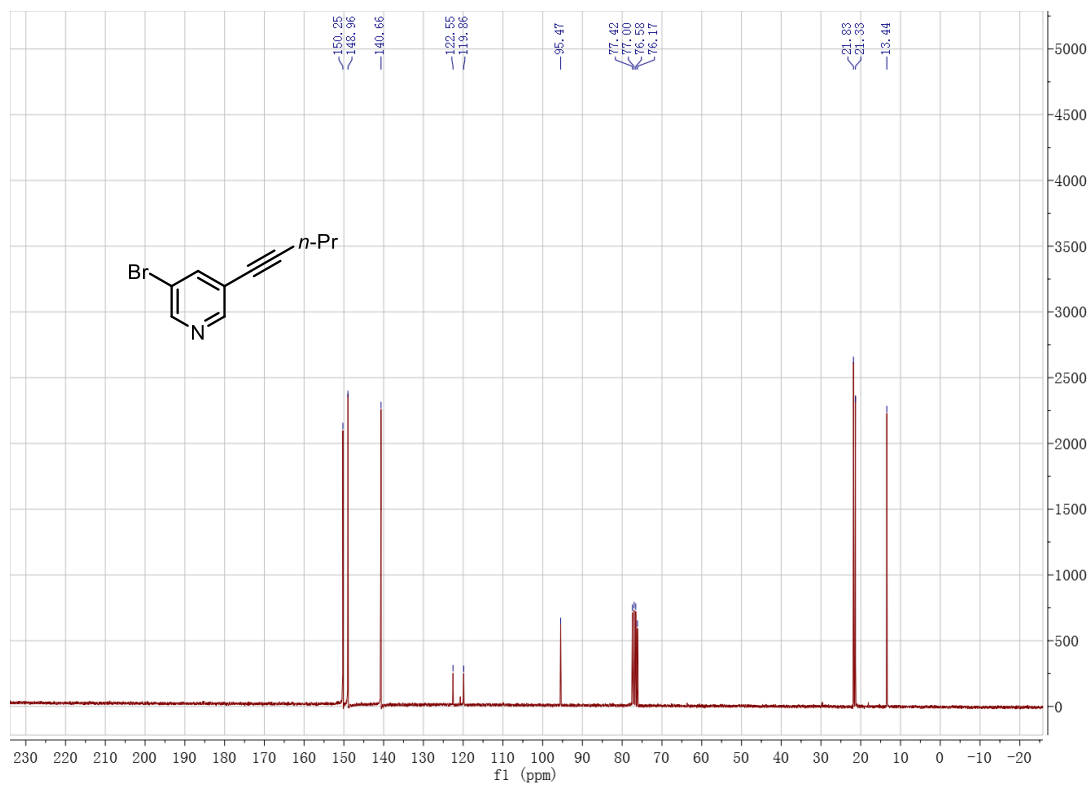

# <sup>1</sup>H NMR Spectrum of 4-(Pent-1-yn-1-yl)thiophene-3-carbonitrile 1p

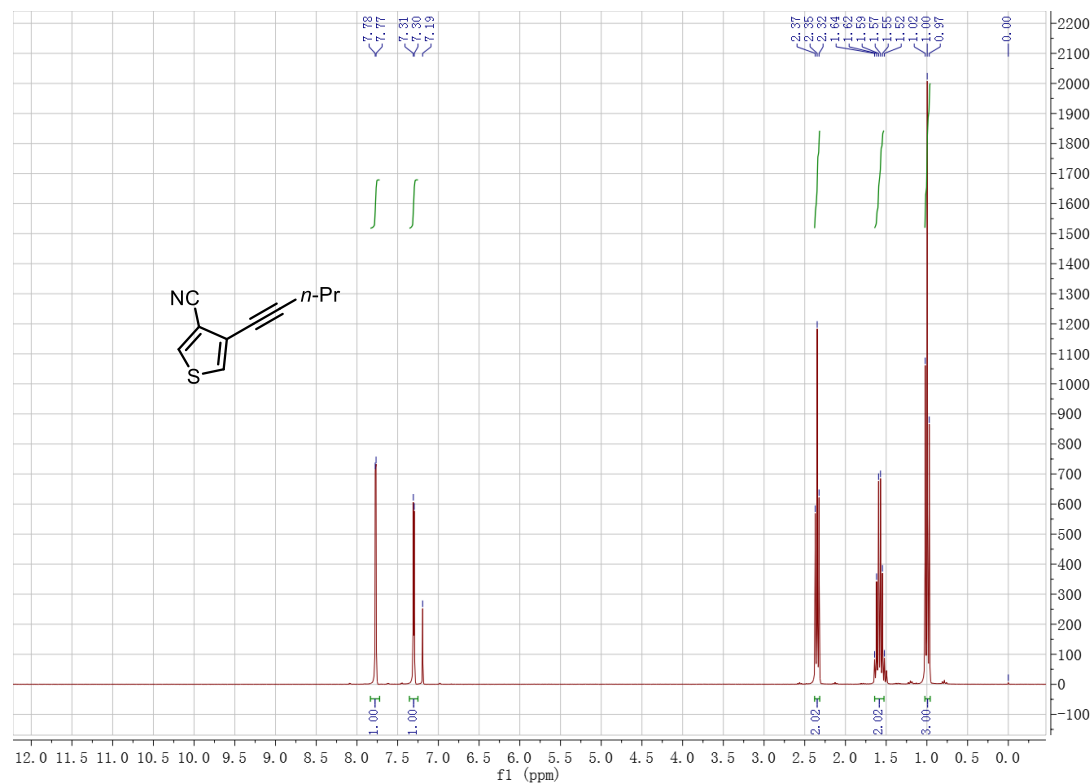

# <sup>13</sup>C NMR Spectrum of 4-(Pent-1-yn-1-yl)thiophene-3-carbonitrile 1p

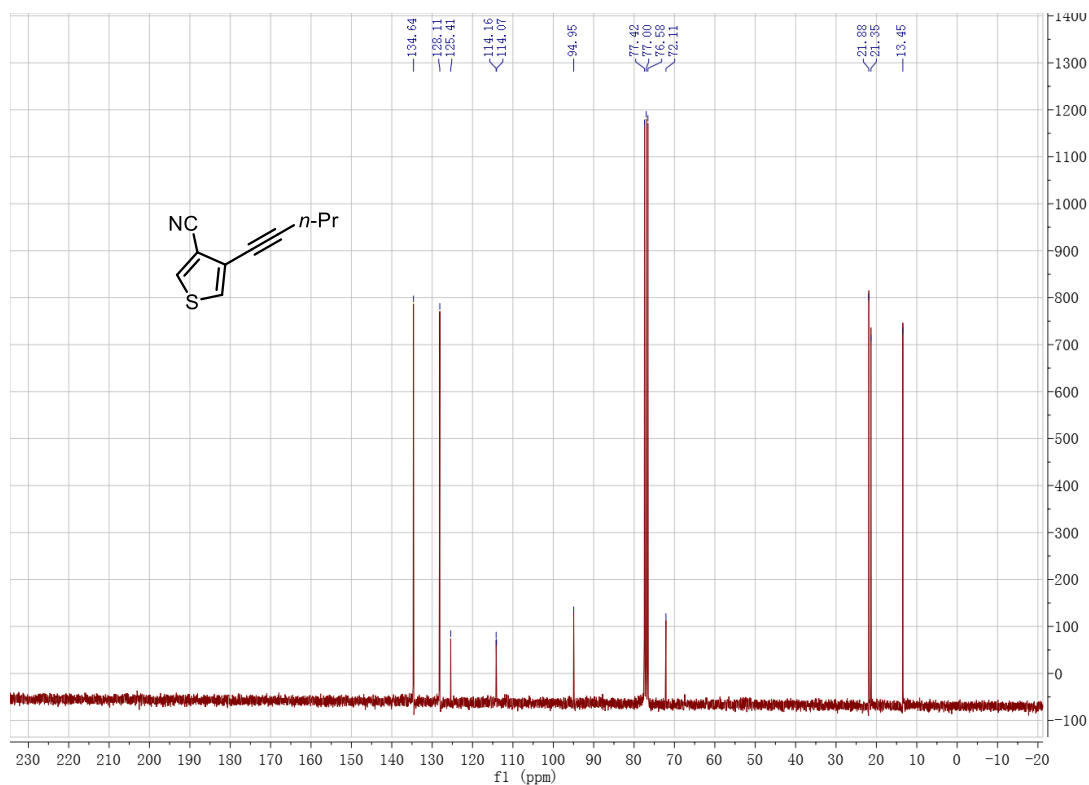

# <sup>1</sup>H NMR Spectrum of Ethyl 4-(3-methoxy-3-oxoprop-1-yn-1-yl)benzoate 1v

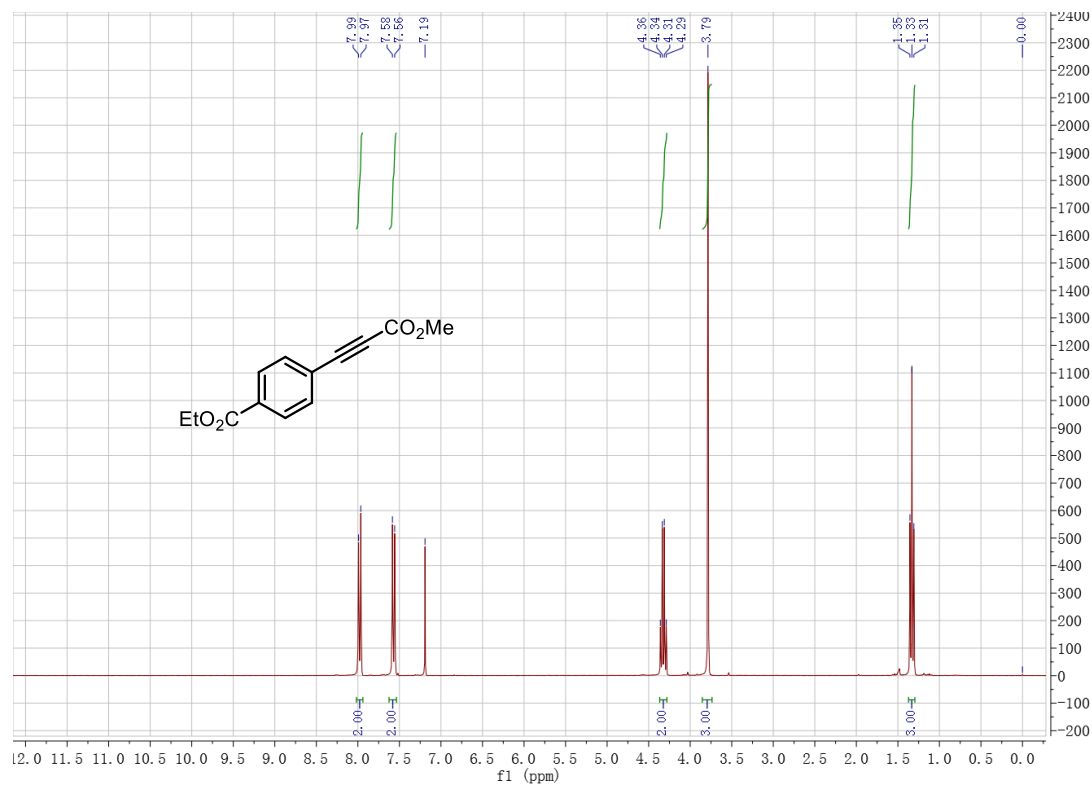

# <sup>13</sup>C NMR Spectrum of Ethyl 4-(3-methoxy-3-oxoprop-1-yn-1-yl)benzoate 1v

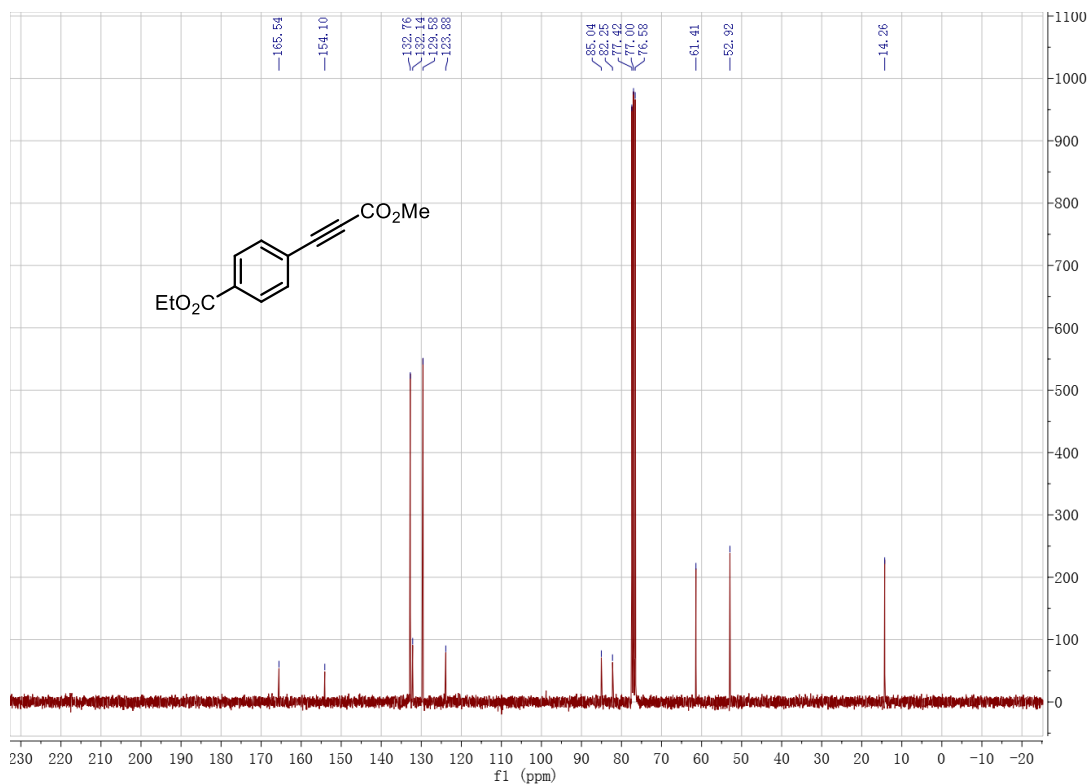

# <sup>1</sup>H NMR Spectrum of 2-(4-Ethynylphenyl)isoindoline-1,3-dione 1ab

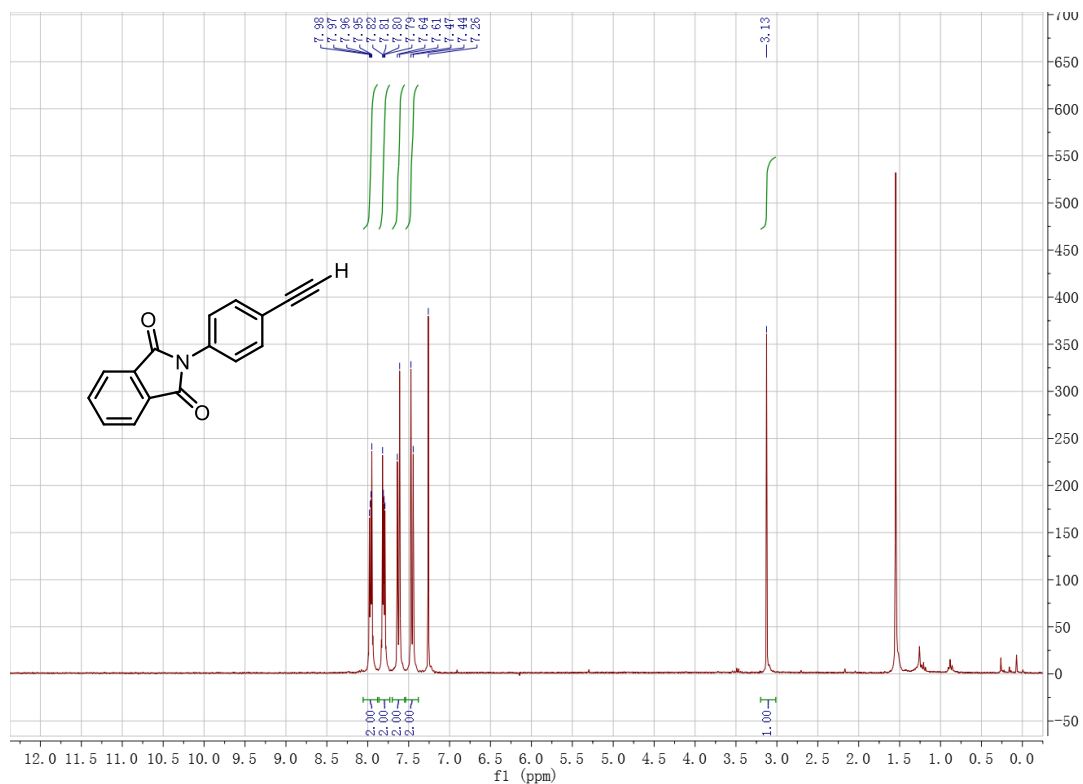

# <sup>13</sup>C NMR Spectrum of 2-(4-Ethynylphenyl)isoindoline-1,3-dione 1ab

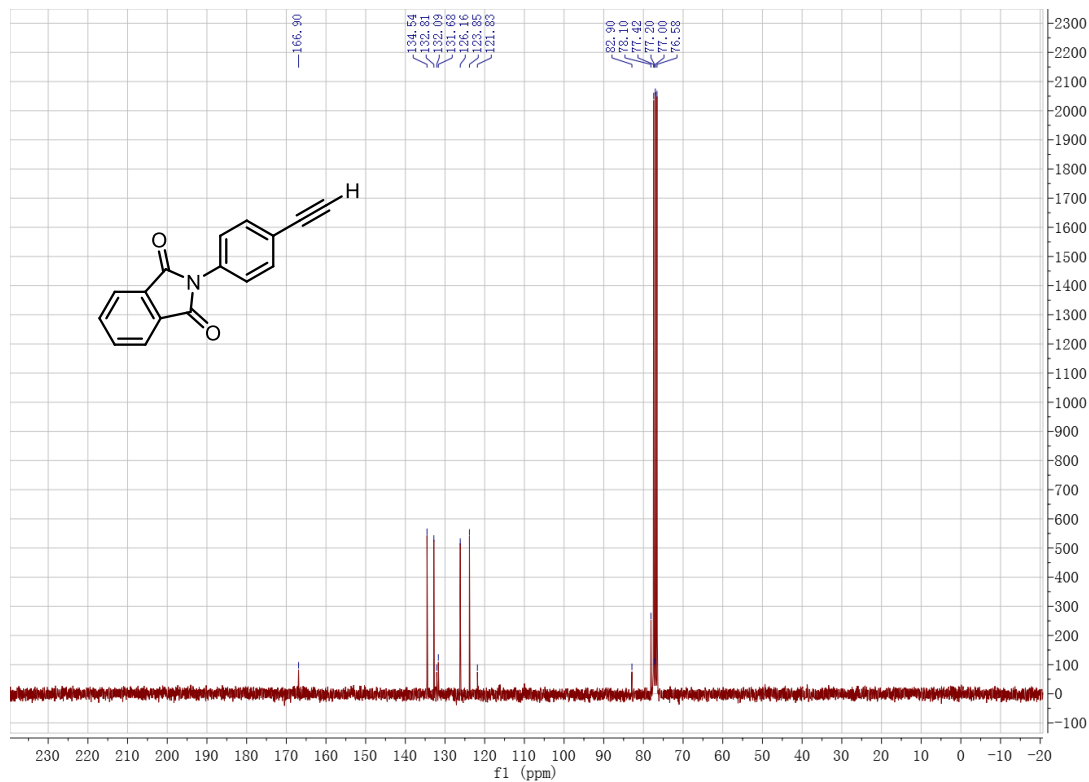

### Spectral of perfluoroalkyltriflation products 3

#### <sup>1</sup>H NMR Spectrum of Ethyl (*E*)-4-(3,3,4,4,5,5,5-heptafluoro-2-propyl-1-(((trifluoromethyl)sulfonyl)oxy)pent-1-en-1-yl)benzoate 3a

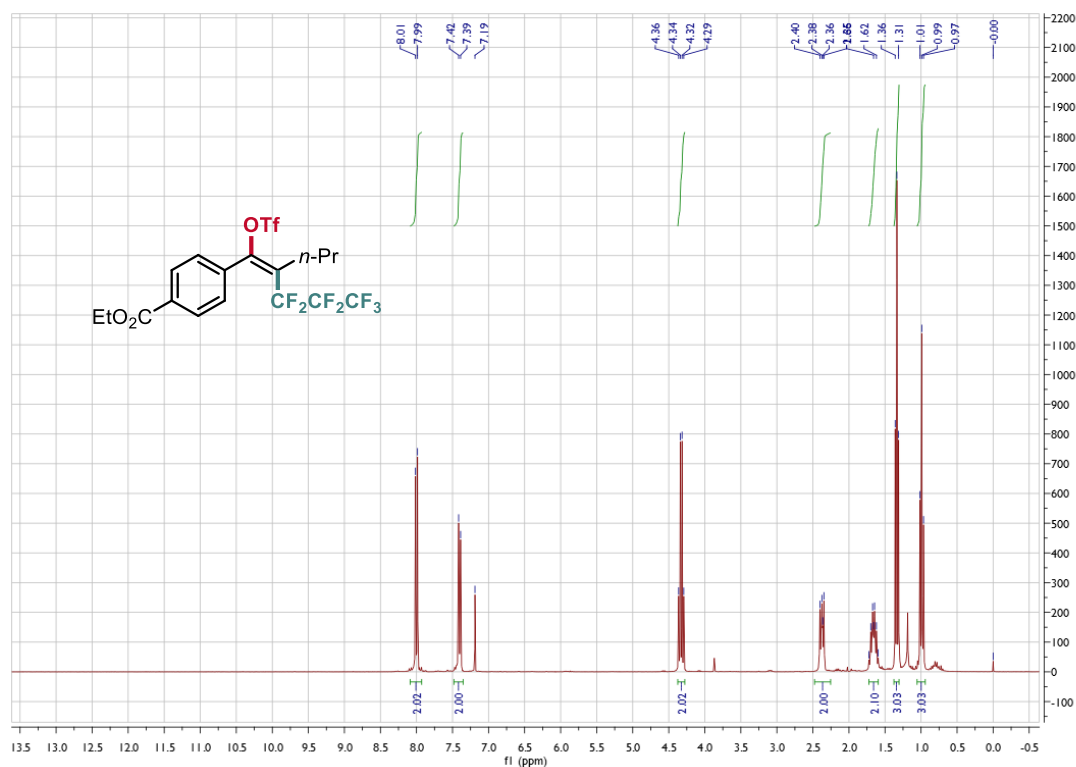

#### <sup>13</sup>C NMR Spectrum of Ethyl (*E*)-4-(3,3,4,4,5,5,5-heptafluoro-2-propyl-1-(((trifluoromethyl)sulfonyl)oxy)pent-1-en-1-yl)benzoate 3a

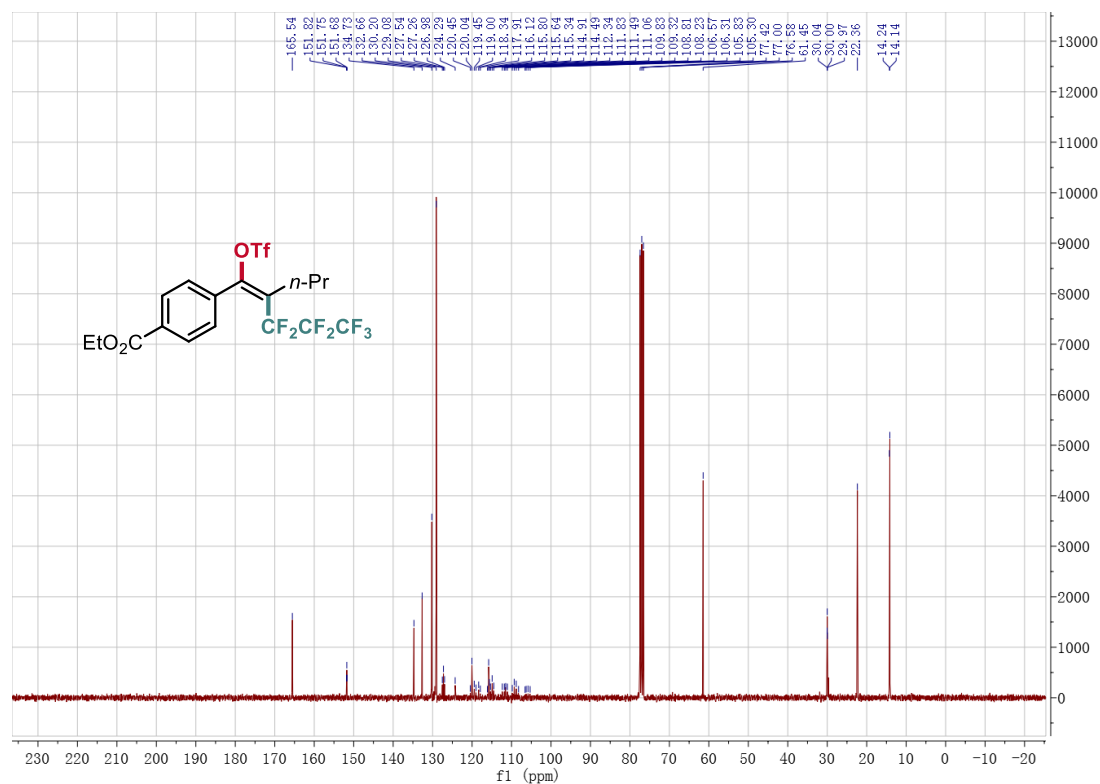

**$^{19}\text{F}$  NMR Spectrum of Ethyl (*E*)-4-(3,3,4,4,5,5,5-heptafluoro-2-propyl-1-(((trifluoromethyl)sulfonyl)oxy)pent-1-en-1-yl)benzoate 3a**

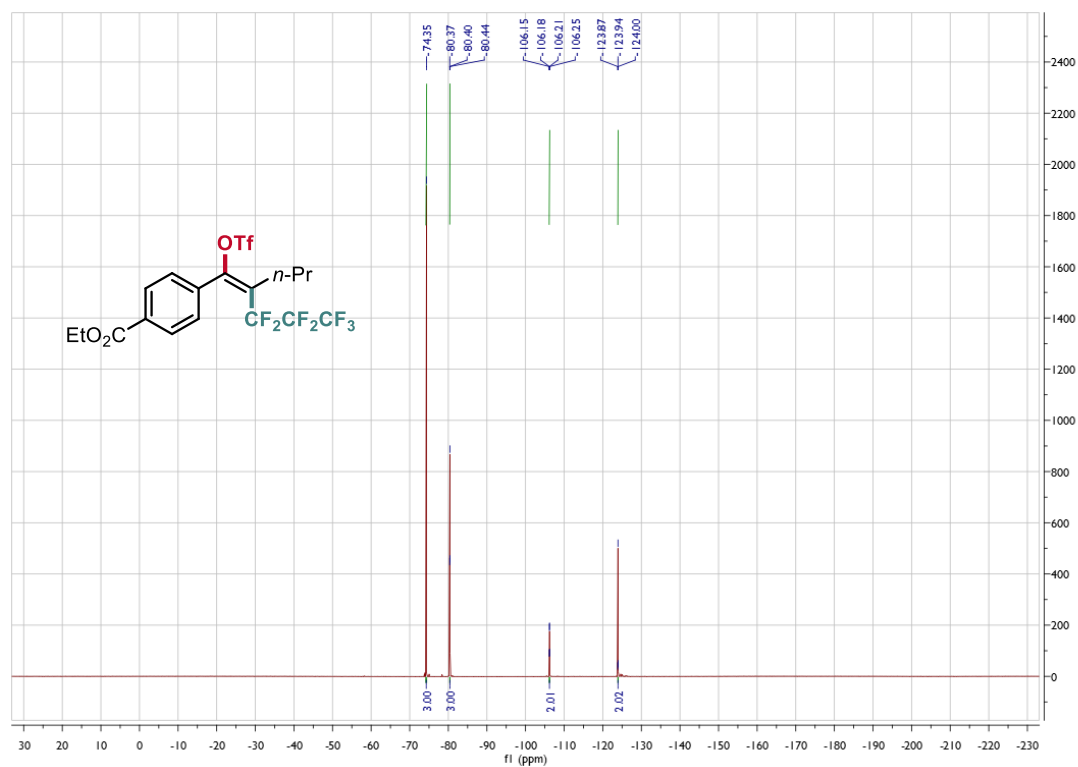

**<sup>1</sup>H NMR Spectrum of (*E*)-1-(4-cyanophenyl)-3,3,4,4,5,5,5-heptafluoro-2-propylpent-1-en-1-yl trifluoromethanesulfonate 3b**

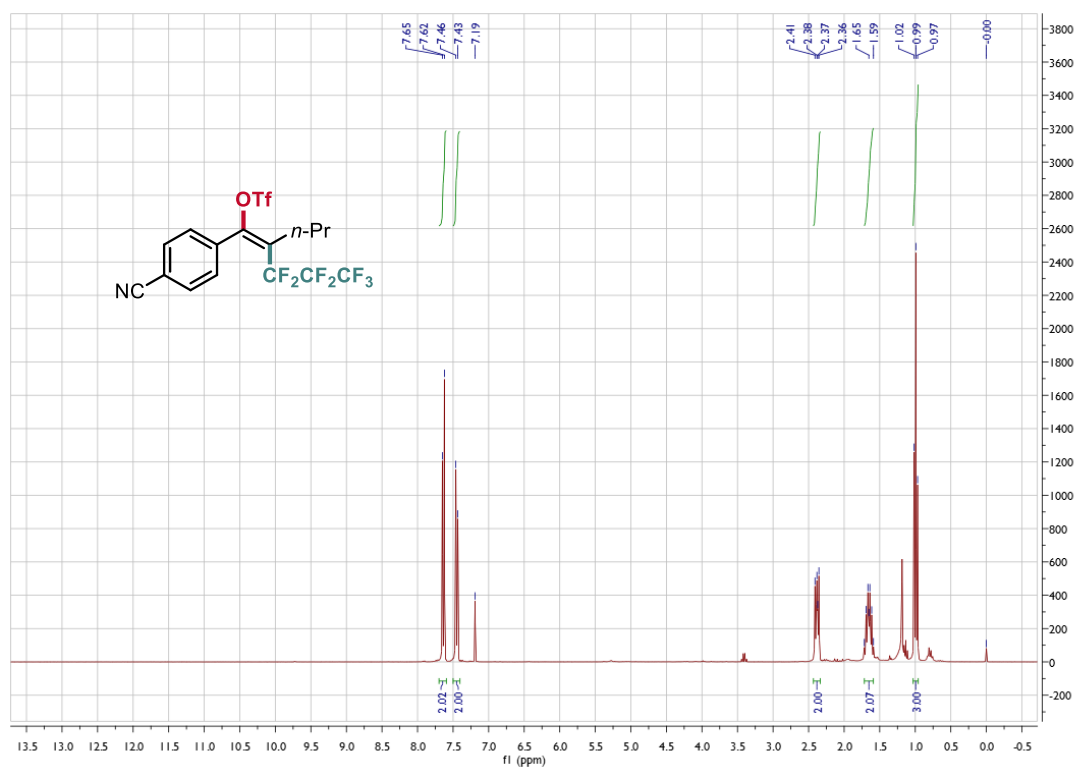

**<sup>13</sup>C NMR Spectrum of (*E*)-1-(4-cyanophenyl)-3,3,4,4,5,5,5-heptafluoro-2-propylpent-1-en-1-yl trifluoromethanesulfonate 3b**

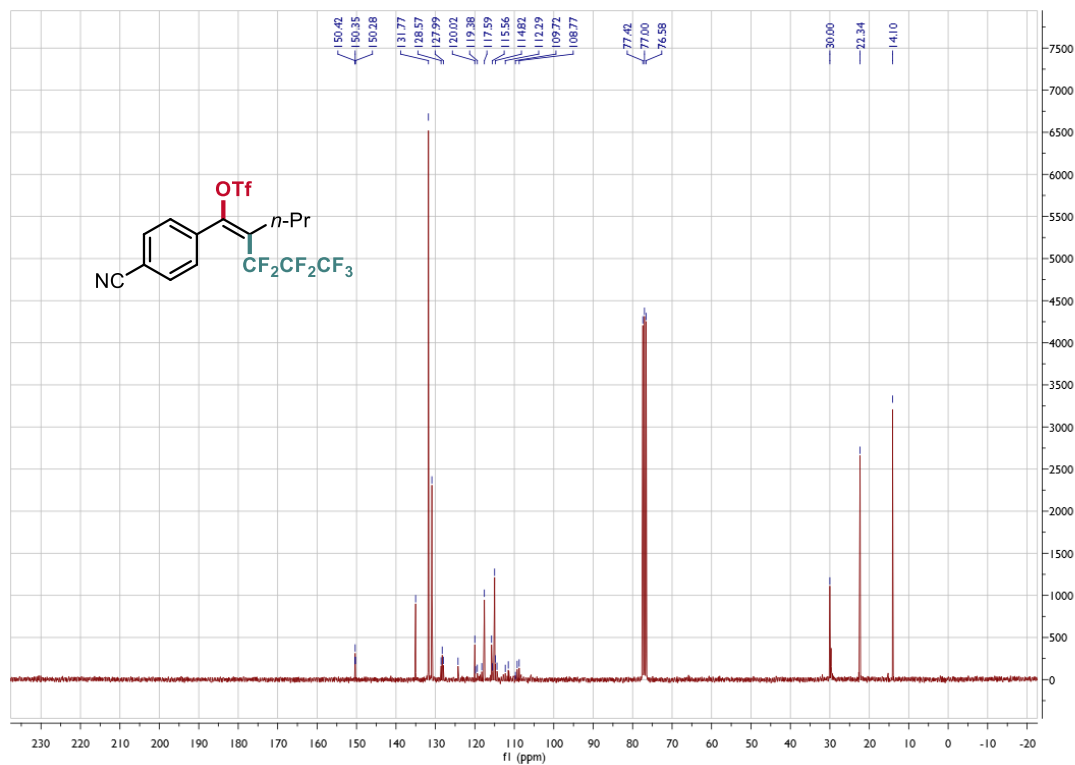

**$^{19}\text{F}$  NMR Spectrum of (*E*)-1-(4-cyanophenyl)-3,3,4,4,5,5,5-heptafluoro-2-propylpent-1-en-1-yl trifluoromethanesulfonate **3b****

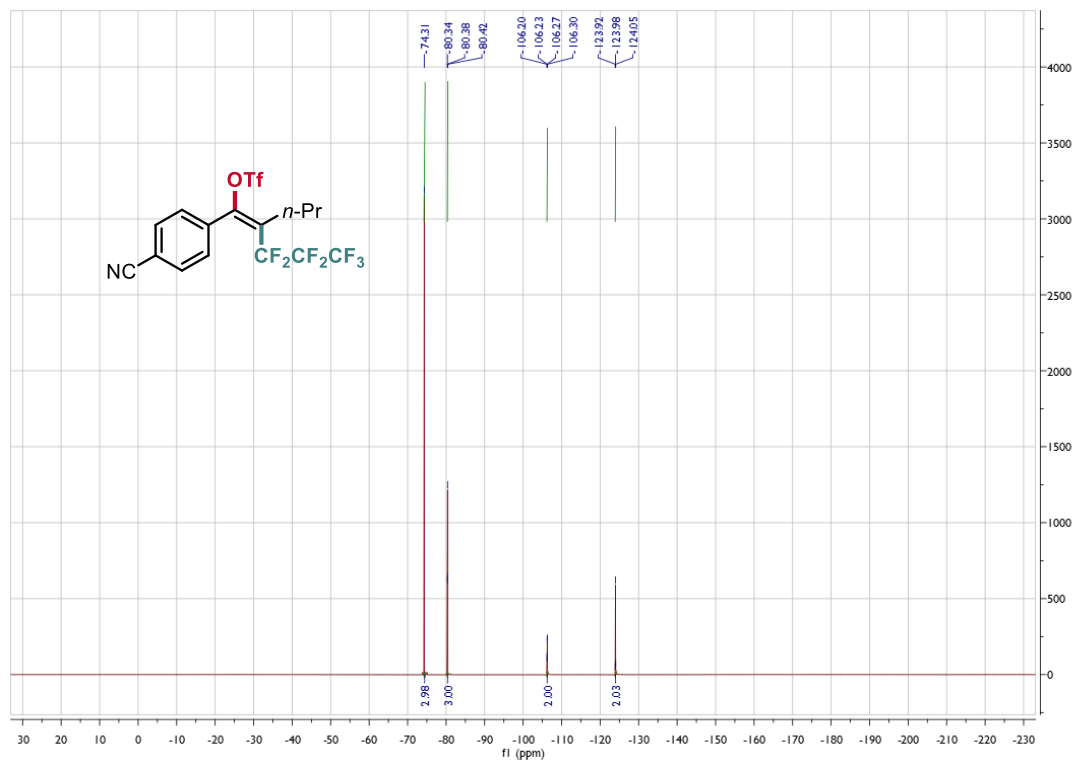

**<sup>1</sup>H NMR Spectrum of (*E*)-1-(4-acetylphenyl)-3,3,4,4,5,5,5-heptafluoro-2-propylpent-1-en-1-yl trifluoromethanesulfonate 3c**

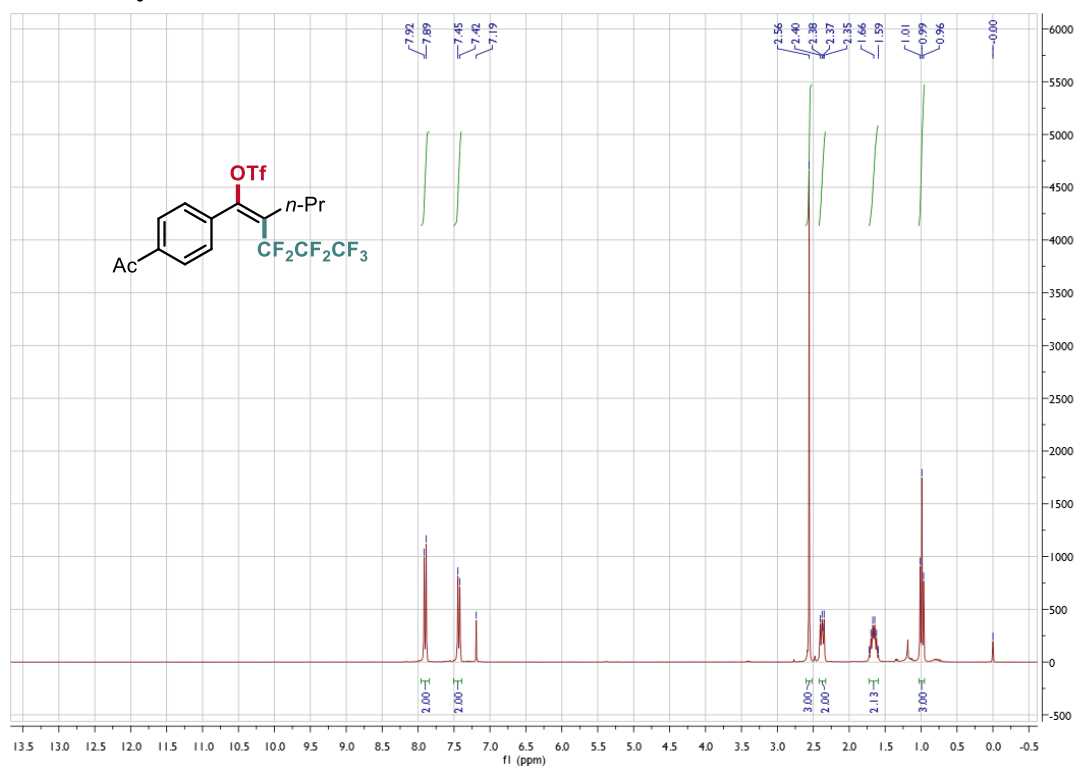

**<sup>13</sup>C NMR Spectrum of (*E*)-1-(4-acetylphenyl)-3,3,4,4,5,5,5-heptafluoro-2-propylpent-1-en-1-yl trifluoromethanesulfonate 3c**

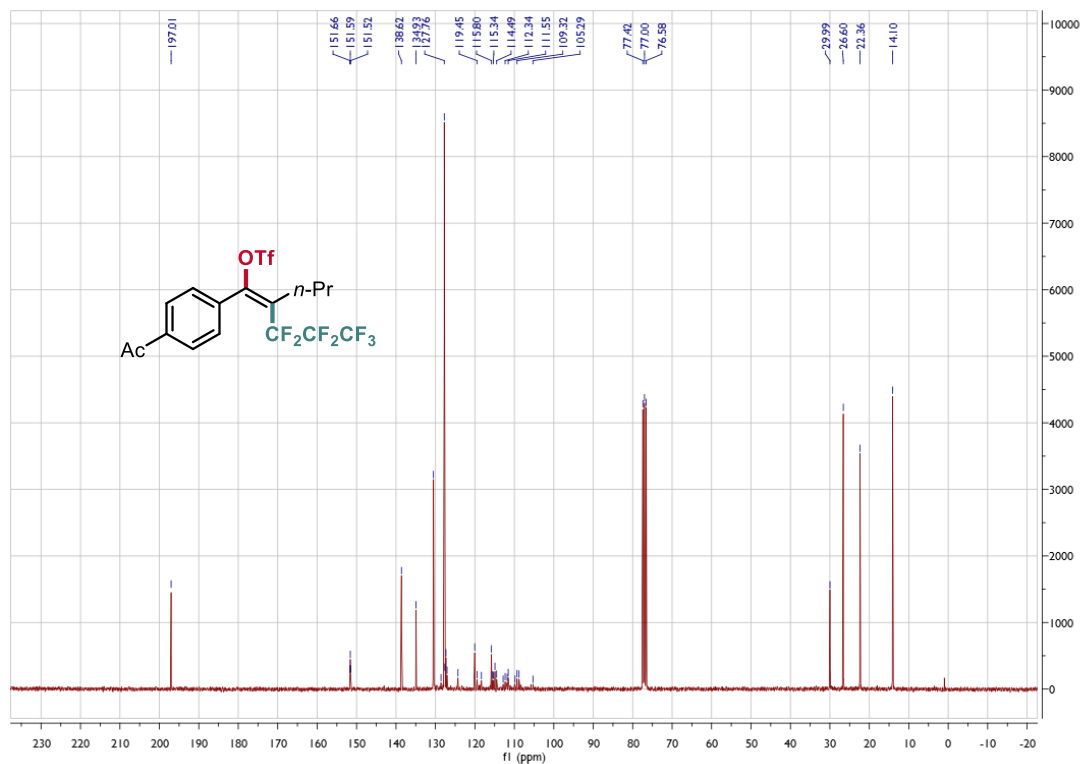

**$^{19}\text{F}$  NMR Spectrum of (*E*)-1-(4-acetylphenyl)-3,3,4,4,5,5,5-heptafluoro-2-propylpent-1-en-1-yl trifluoromethanesulfonate **3c****

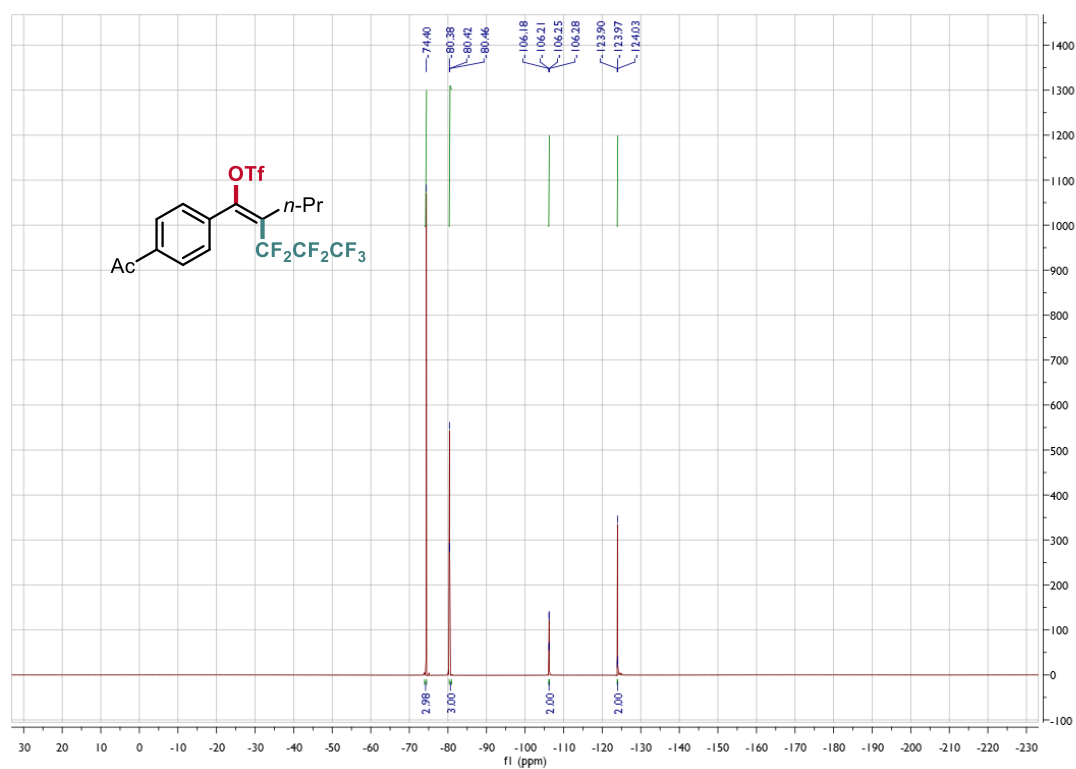

**<sup>1</sup>H NMR Spectrum of (*E*)-1-(4-(diethylcarbamoyl)phenyl)-3,3,4,4,5,5,5-heptafluoro-2-propylpent-1-en-1-yl trifluoromethane sulfonate 3d**

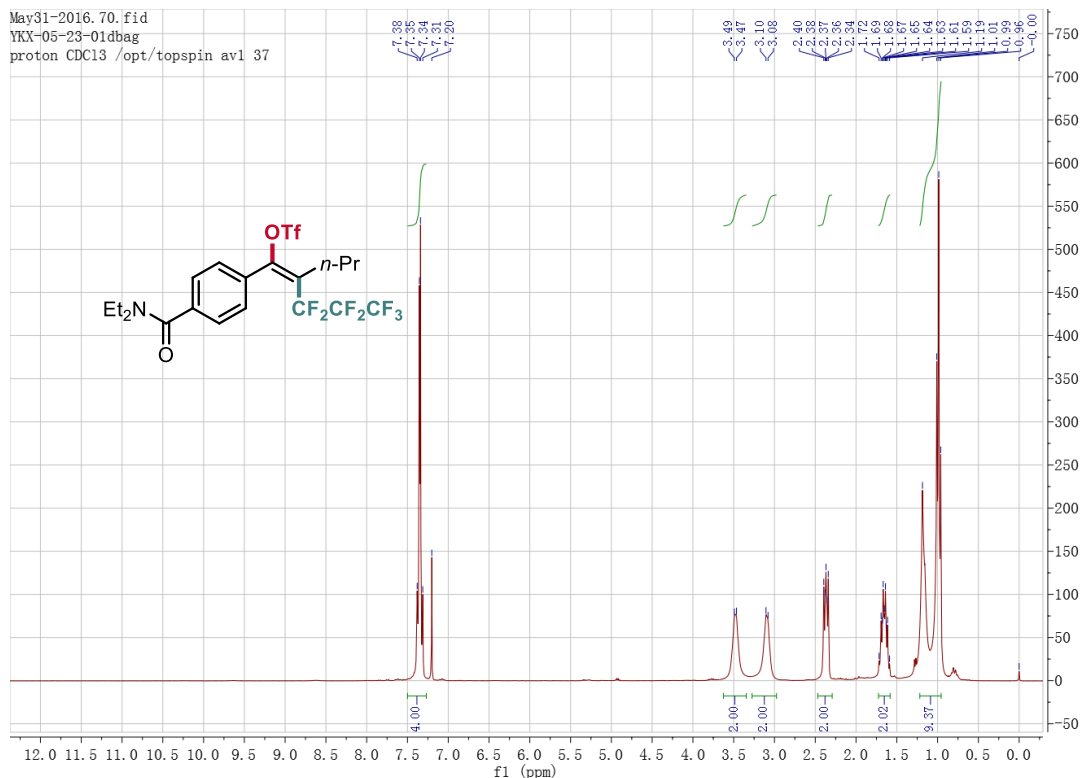

**<sup>13</sup>C NMR Spectrum of (*E*)-1-(4-(diethylcarbamoyl)phenyl)-3,3,4,4,5,5,5-heptafluoro-2-propylpent-1-en-1-yl trifluoromethane sulfonate 3d**

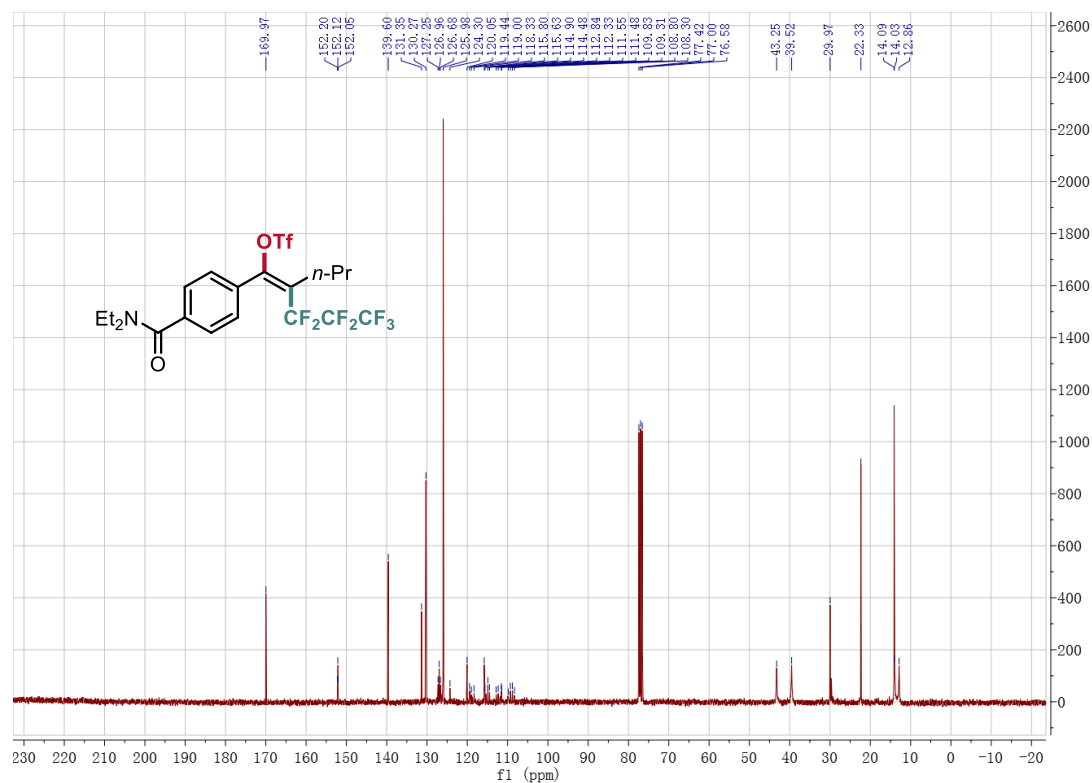

**$^{19}\text{F}$  NMR Spectrum of (*E*)-1-(4-(diethylcarbamoyl)phenyl)-3,3,4,4,5,5,5-heptafluoro-2-propylpent-1-en-1-yl trifluoromethane sulfonate 3d**

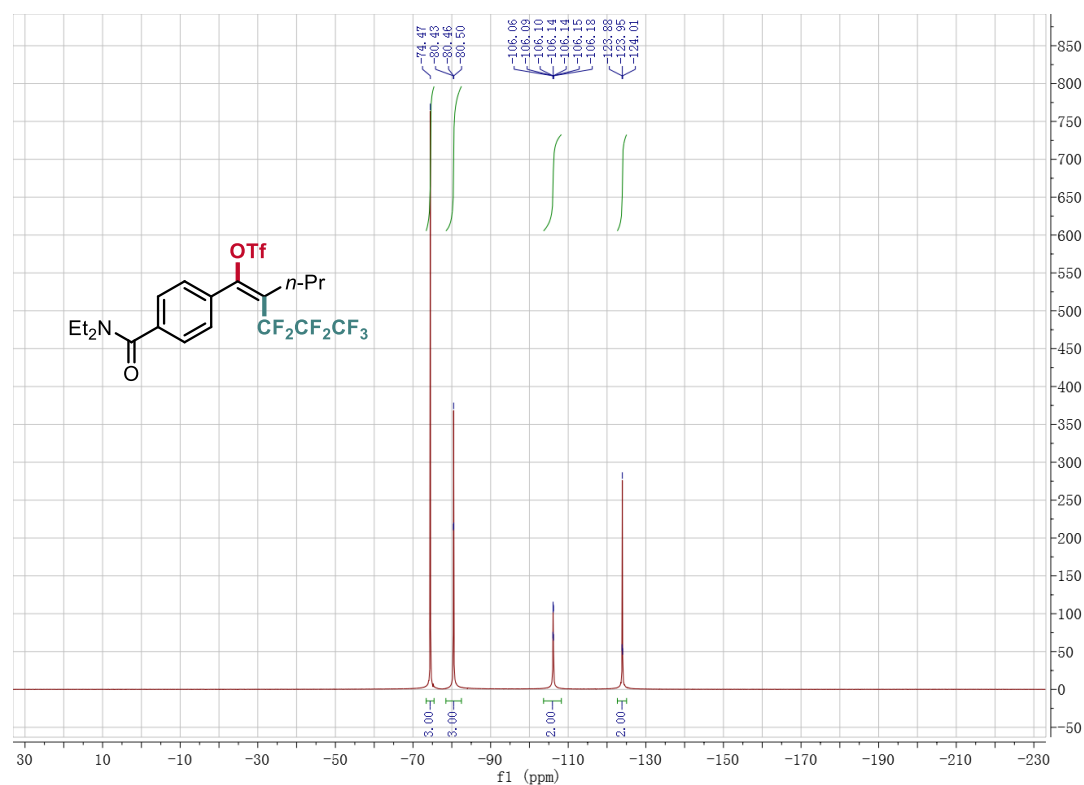

**Chemical Structure:** CC(C)=C(C(F)(F)F)C(=O)Oc1ccc(S(=O)(=O)OC)cc1

**<sup>1</sup>H NMR Data (CDCl<sub>3</sub>):**

| Chemical Shift (ppm)                                                   | Integration |
|------------------------------------------------------------------------|-------------|
| 7.91, 7.88, 7.53, 7.50                                                 | 2.00        |
| 7.16                                                                   | 2.00        |
| 3.80                                                                   | 3.00        |
| 2.39, 2.38, 2.33, 2.32, 2.29, 2.17, 1.64, 1.61, 1.60, 1.59, 1.56, 1.55 | 2.00        |
| 1.99, 0.96, 0.94                                                       | 2.01        |
| 1.00                                                                   | 3.00        |

**$^{19}\text{F}$  NMR Spectrum of (*E*)-3,3,4,4,5,5,5-heptafluoro-1-(4-(methylsulfonyl)phenyl)-2-propylpent-1-en-1-yl trifluoromethanesulfonate **3e****

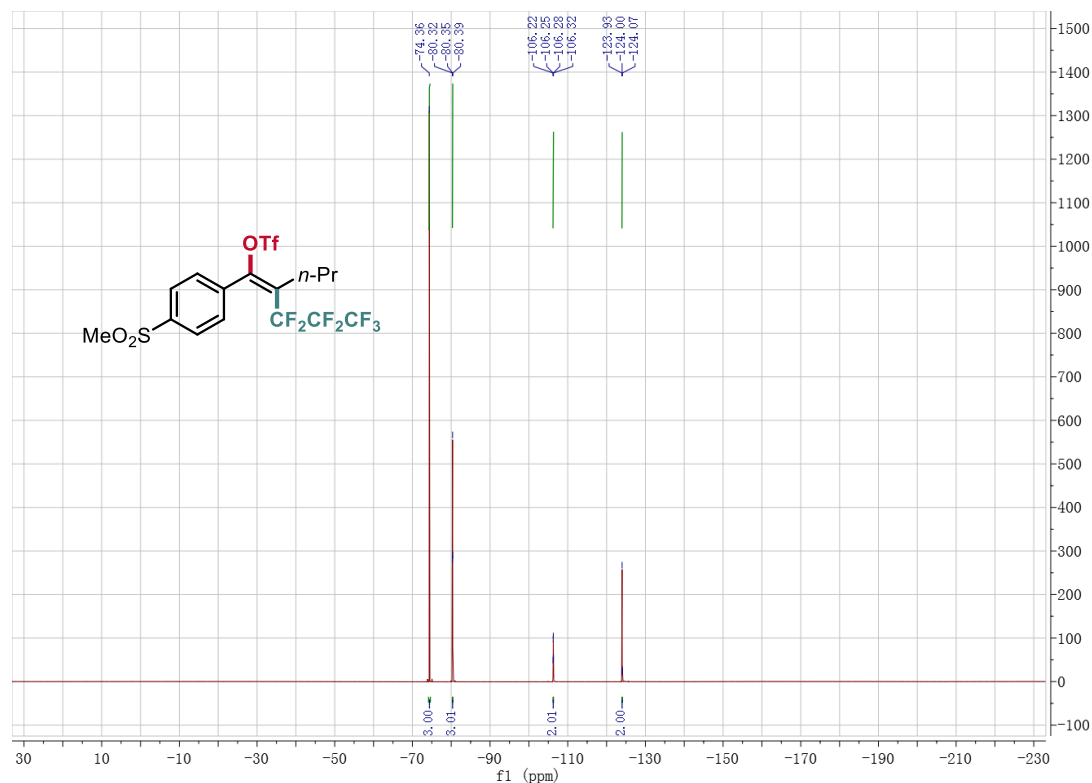

**$^{19}\text{F}$ - $^1\text{H}$  HOESY NMR Spectrum of (*E*)-3,3,4,4,5,5,5-heptafluoro-1-(4-(methylsulfonyl)phenyl)-2-propylpent-1-en-1-yl trifluoromethanesulfonate **3e****

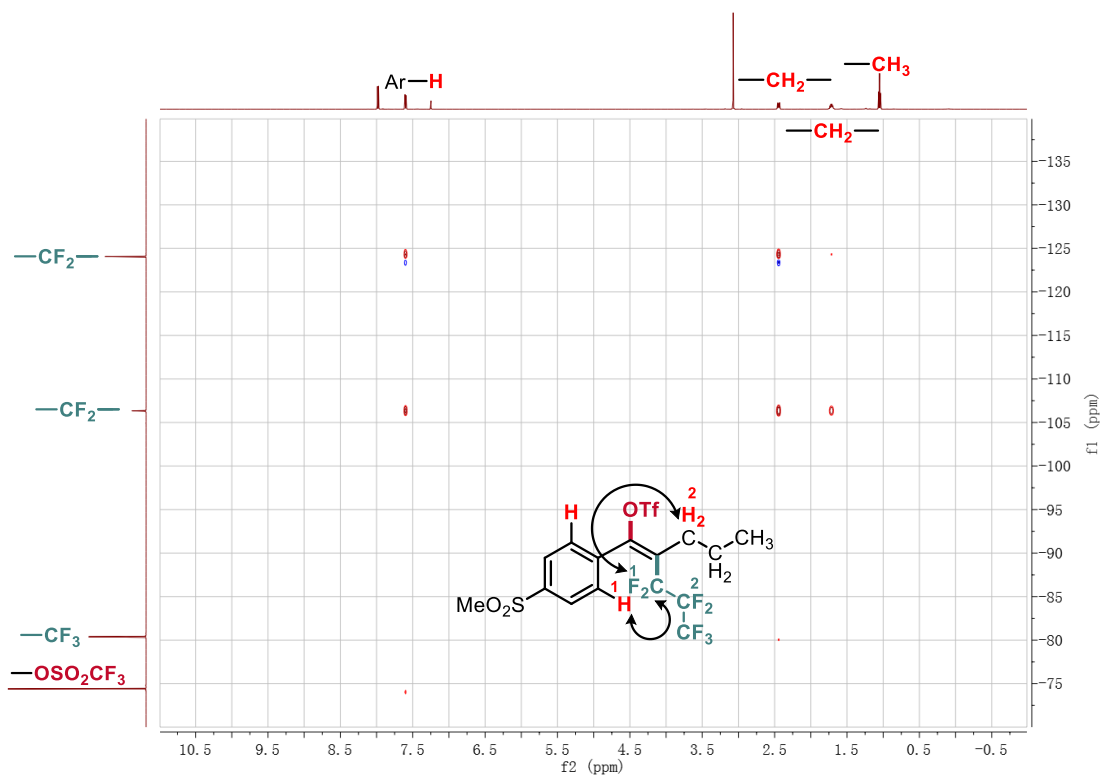

**$^{19}\text{F}$  NMR Spectrum of (*E*)-3,3,4,4,5,5,5-heptafluoro-1-phenyl-2-propylpent-1-en-1-yl trifluoromethanesulfonate 3f**

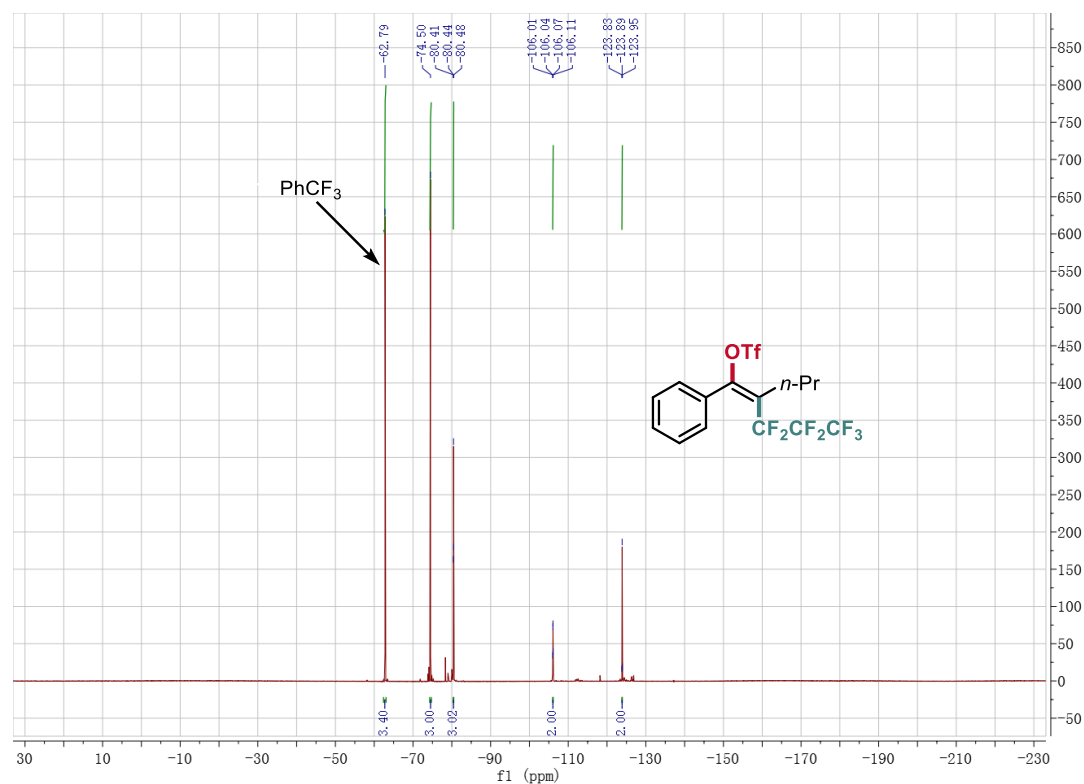

**$^{19}\text{F}$  NMR Spectrum of (*E*)-1-(4-chlorophenyl)-3,3,4,4,5,5,5-heptafluoro-2-propyl pent-1-en-1-yl trifluoromethanesulfonate **3g****

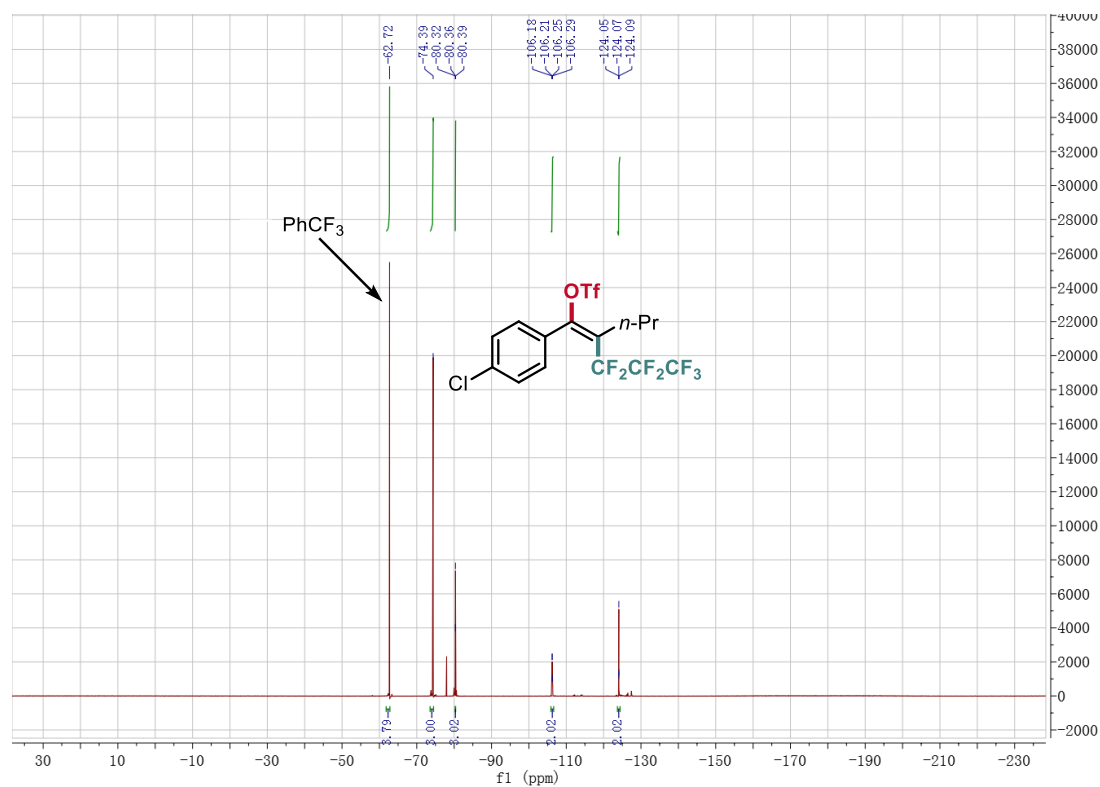

**$^{19}\text{F}$  NMR Spectrum of (*E*)-1-(4-(1,3-dioxisoindolin-2-yl)phenyl)-3,3,4,4,5, 5,5-heptafluoro-2-propylpent-1-en-1-yl trifluoromethanesulfonate 3h**

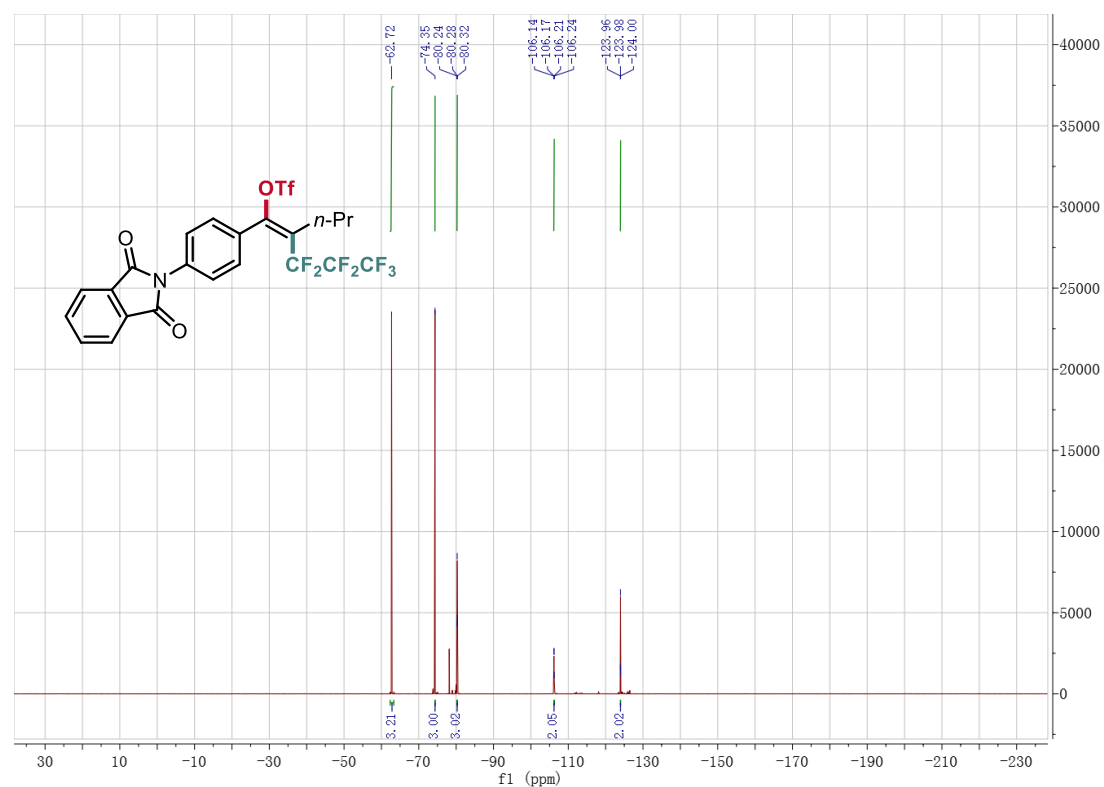

**<sup>1</sup>H NMR Spectrum of (E)-4-(3,3,4,4,5,5,5-heptafluoro-2-propyl-1-(((trifluoromethyl)sulfonyl)oxy)pent-1-en-1-yl)phenyl 4-methylbenzene sulfonate 3i**

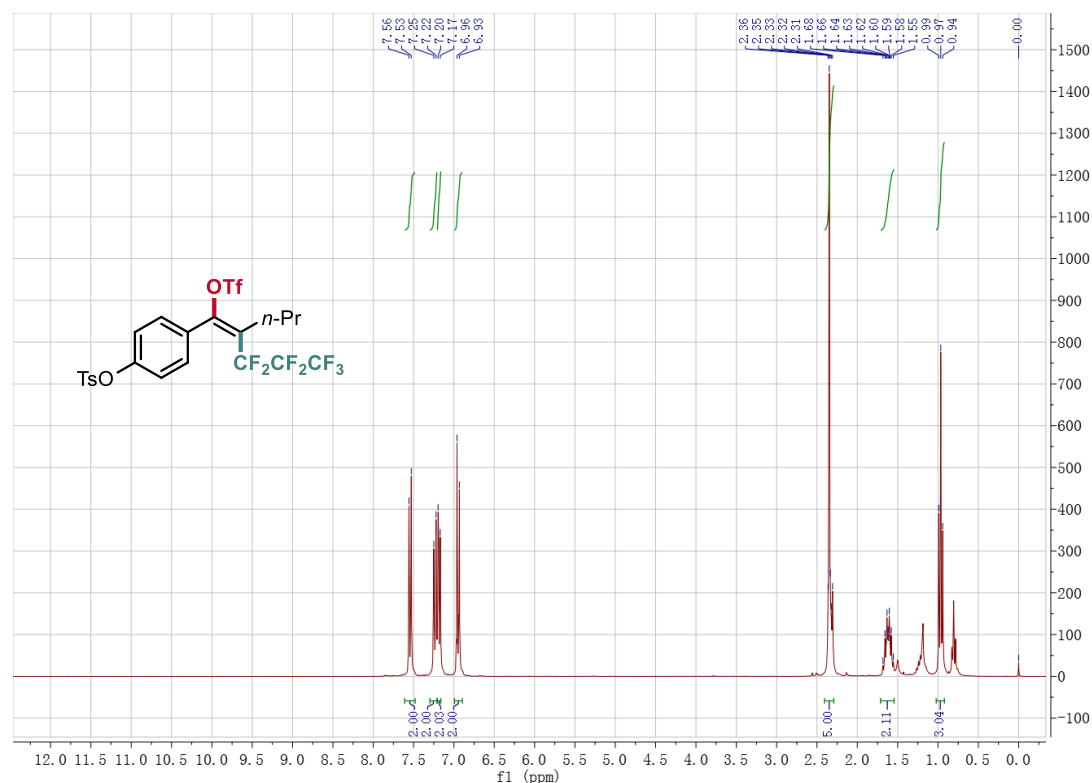

**<sup>13</sup>C NMR Spectrum of (E)-4-(3,3,4,4,5,5,5-heptafluoro-2-propyl-1-(((trifluoromethyl)sulfonyl)oxy)pent-1-en-1-yl)phenyl 4-methylbenzene sulfonate 3i**

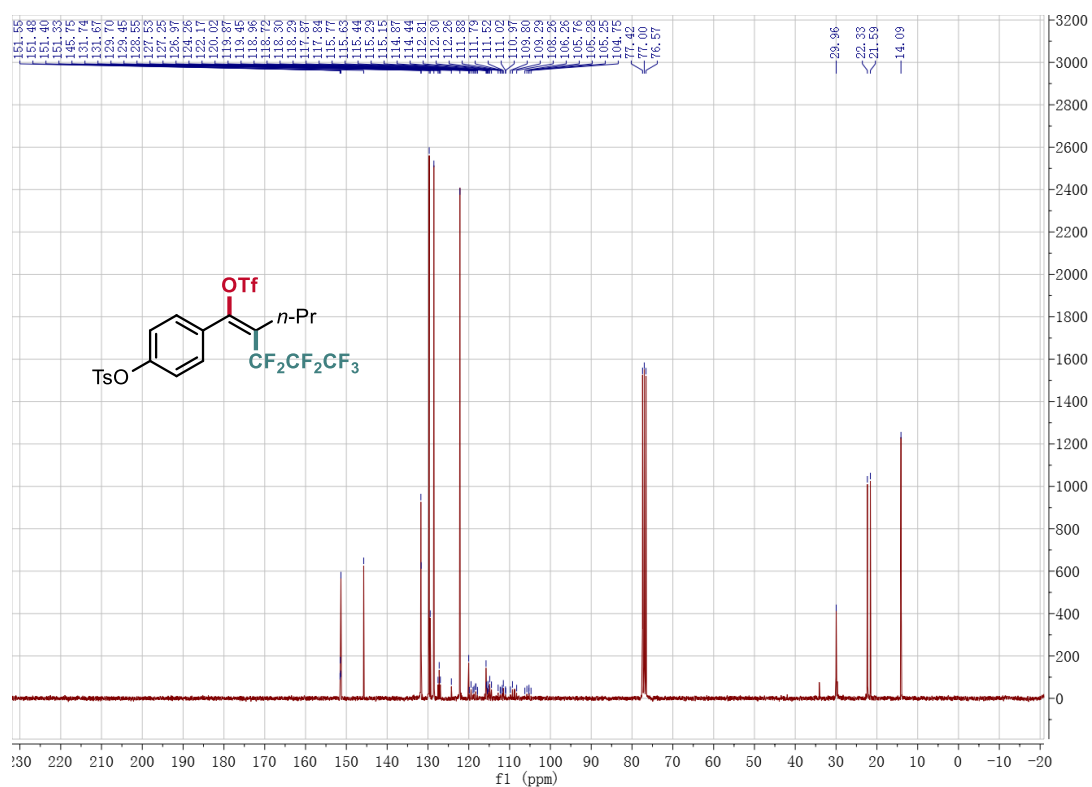

**$^{19}\text{F}$  NMR Spectrum of (*E*)-4-(3,3,4,4,5,5,5-heptafluoro-2-propyl-1-(((trifluoromethyl)sulfonyl)oxy)pent-1-en-1-yl)phenyl 4-methylbenzene sulfonate 3i**

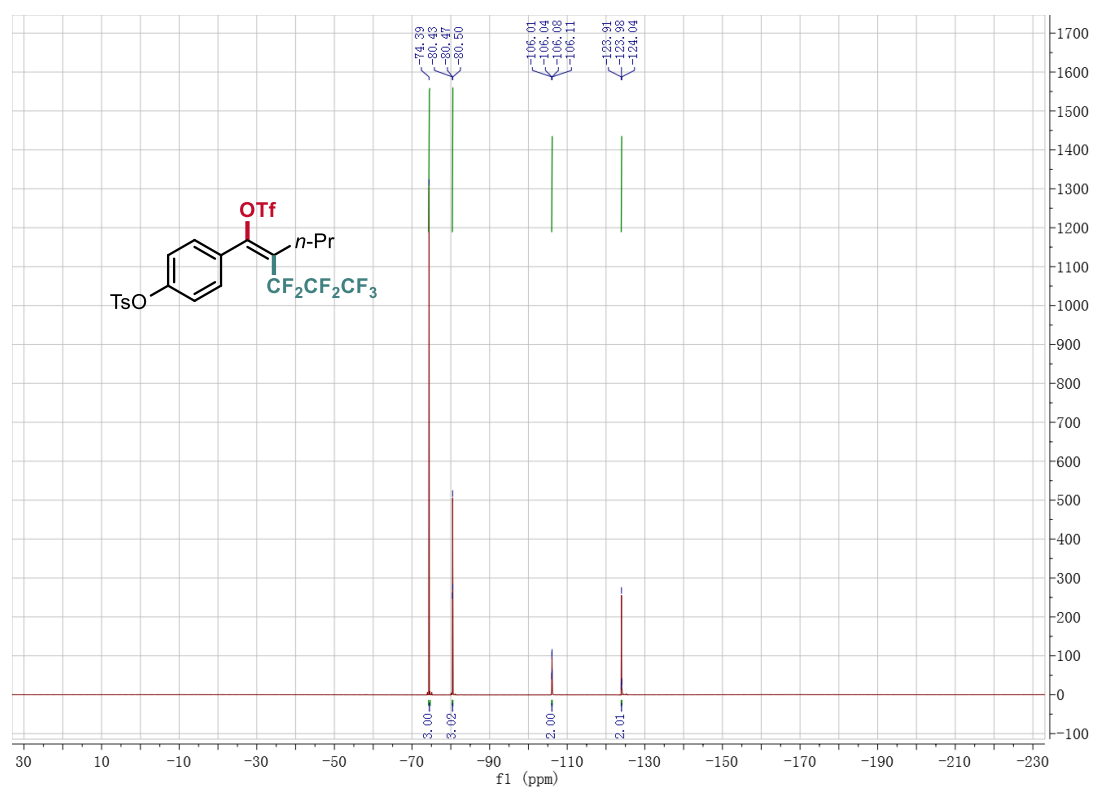

CC(C)=C(c1ccc(I)cc1)C(F)(F)F

<sup>1</sup>H NMR spectrum (400 MHz, CDCl<sub>3</sub>) of 1-(4-iodophenyl)-2-(trifluoromethyl)prop-1-ene. The spectrum shows peaks for the aromatic protons (7.0-7.8 ppm), the propene protons (1.5-2.5 ppm), and the trifluoromethyl group (3.0 ppm). Integration values are provided for each set of peaks.

| Chemical Shift (ppm)   | Integration |
|------------------------|-------------|
| 7.75, 7.72, 7.69, 7.66 | 1.00        |
| 7.22, 7.19, 7.09, 7.06 | 1.00        |
| 2.45, 2.42, 2.39, 2.36 | 2.00        |
| 1.65, 1.62, 1.59, 1.56 | 2.00        |
| 3.00                   | 3.00        |

Chemical structure: CCCC(=C(C(F)(F)F)C1=CC=C(I)C=C1)OC(F)(F)F

<sup>1</sup>H NMR spectrum (CDCl<sub>3</sub>) showing peaks for the compound. The x-axis represents the chemical shift in ppm (f1), ranging from -20 to 230. The y-axis represents the intensity, ranging from 0 to 65000. The spectrum shows several peaks, with the most prominent ones in the aromatic region (6.8-7.8 ppm) and the vinyl region (4.8-5.8 ppm). The trifluoromethyl group (CF<sub>2</sub>CF<sub>2</sub>CF<sub>3</sub>) is labeled in green, and the n-propyl group (n-Pr) is labeled in blue. The trifluoromethyl group is also labeled in red as OTf.

Peak list (ppm): 7.75, 7.73, 7.71, 7.69, 7.67, 7.65, 7.63, 7.61, 7.59, 7.57, 7.55, 7.53, 7.51, 7.49, 7.47, 7.45, 7.43, 7.41, 7.39, 7.37, 7.35, 7.33, 7.31, 7.29, 7.27, 7.25, 7.23, 7.21, 7.19, 7.17, 7.15, 7.13, 7.11, 7.09, 7.07, 7.05, 7.03, 7.01, 6.99, 6.97, 6.95, 6.93, 6.91, 6.89, 6.87, 6.85, 6.83, 6.81, 6.79, 6.77, 6.75, 6.73, 6.71, 6.69, 6.67, 6.65, 6.63, 6.61, 6.59, 6.57, 6.55, 6.53, 6.51, 6.49, 6.47, 6.45, 6.43, 6.41, 6.39, 6.37, 6.35, 6.33, 6.31, 6.29, 6.27, 6.25, 6.23, 6.21, 6.19, 6.17, 6.15, 6.13, 6.11, 6.09, 6.07, 6.05, 6.03, 6.01, 5.99, 5.97, 5.95, 5.93, 5.91, 5.89, 5.87, 5.85, 5.83, 5.81, 5.79, 5.77, 5.75, 5.73, 5.71, 5.69, 5.67, 5.65, 5.63, 5.61, 5.59, 5.57, 5.55, 5.53, 5.51, 5.49, 5.47, 5.45, 5.43, 5.41, 5.39, 5.37, 5.35, 5.33, 5.31, 5.29, 5.27, 5.25, 5.23, 5.21, 5.19, 5.17, 5.15, 5.13, 5.11, 5.09, 5.07, 5.05, 5.03, 5.01, 4.99, 4.97, 4.95, 4.93, 4.91, 4.89, 4.87, 4.85, 4.83, 4.81, 4.79, 4.77, 4.75, 4.73, 4.71, 4.69, 4.67, 4.65, 4.63, 4.61, 4.59, 4.57, 4.55, 4.53, 4.51, 4.49, 4.47, 4.45, 4.43, 4.41, 4.39, 4.37, 4.35, 4.33, 4.31, 4.29, 4.27, 4.25, 4.23, 4.21, 4.19, 4.17, 4.15, 4.13, 4.11, 4.09, 4.07, 4.05, 4.03, 4.01, 3.99, 3.97, 3.95, 3.93, 3.91, 3.89, 3.87, 3.85, 3.83, 3.81, 3.79, 3.77, 3.75, 3.73, 3.71, 3.69, 3.67, 3.65, 3.63, 3.61, 3.59, 3.57, 3.55, 3.53, 3.51, 3.49, 3.47, 3.45, 3.43, 3.41, 3.39, 3.37, 3.35, 3.33, 3.31, 3.29, 3.27, 3.25, 3.23, 3.21, 3.19, 3.17, 3.15, 3.13, 3.11, 3.09, 3.07, 3.05, 3.03, 3.01, 2.99, 2.97, 2.95, 2.93, 2.91, 2.89, 2.87, 2.85, 2.83, 2.81, 2.79, 2.77, 2.75, 2.73, 2.71, 2.69, 2.67, 2.65, 2.63, 2.61, 2.59, 2.57, 2.55, 2.53, 2.51, 2.49, 2.47, 2.45, 2.43, 2.41, 2.39, 2.37, 2.35, 2.33, 2.31, 2.29, 2.27, 2.25, 2.23, 2.21, 2.19, 2.17, 2.15, 2.13, 2.11, 2.09, 2.07, 2.05, 2.03, 2.01, 1.99, 1.97, 1.95, 1.93, 1.91, 1.89, 1.87, 1.85, 1.83, 1.81, 1.79, 1.77, 1.75, 1.73, 1.71, 1.69, 1.67, 1.65, 1.63, 1.61, 1.59, 1.57, 1.55, 1.53, 1.51, 1.49, 1.47, 1.45, 1.43, 1.41, 1.39, 1.37, 1.35, 1.33, 1.31, 1.29, 1.27, 1.25, 1.23, 1.21, 1.19, 1.17, 1.15, 1.13, 1.11, 1.09, 1.07, 1.05, 1.03, 1.01, 0.99, 0.97, 0.95, 0.93, 0.91, 0.89, 0.87, 0.85, 0.83, 0.81, 0.79, 0.77, 0.75, 0.73, 0.71, 0.69, 0.67, 0.65, 0.63, 0.61, 0.59, 0.57, 0.55, 0.53, 0.51, 0.49, 0.47, 0.45, 0.43, 0.41, 0.39, 0.37, 0.35, 0.33, 0.31, 0.29, 0.27, 0.25, 0.23, 0.21, 0.19, 0.17, 0.15, 0.13, 0.11, 0.09, 0.07, 0.05, 0.03, 0.01, 0.99, 0.97, 0.95, 0.93, 0.91, 0.89, 0.87, 0.85, 0.83, 0.81, 0.79, 0.77, 0.75, 0.73, 0.71, 0.69, 0.67, 0.65, 0.63, 0.61, 0.59, 0.57, 0.55, 0.53, 0.51, 0.49, 0.47, 0.45, 0.43, 0.41, 0.39, 0.37, 0.35, 0.33, 0.31, 0.29, 0.27, 0.25, 0.23, 0.21, 0.19, 0.17, 0.15, 0.13, 0.11, 0.09, 0.07, 0.05, 0.03, 0.01, 0.99, 0.97, 0.95, 0.93, 0.91, 0.89, 0.87, 0.85, 0.83, 0.81, 0.79, 0.77, 0.75, 0.73, 0.71, 0.69, 0.67, 0.65, 0.63, 0.61, 0.59, 0.57, 0.55, 0.53, 0.51, 0.49, 0.47, 0.45, 0.43, 0.41, 0.39, 0.37, 0.35, 0.33, 0.31, 0.29, 0.27, 0.25, 0.23, 0.21, 0.19, 0.17, 0.15, 0.13, 0.11, 0.09, 0.07, 0.05, 0.03, 0.01, 0.99, 0.97, 0.95, 0.93, 0.91, 0.89, 0.87, 0.85, 0.83, 0.81, 0.79, 0.77, 0.75, 0.73, 0.71, 0.69, 0.67, 0.65, 0.63, 0.61, 0.59, 0.57, 0.55, 0.53, 0.51, 0.49, 0.47, 0.45, 0.43, 0.41, 0.39, 0.37, 0.35, 0.33, 0.31, 0.29, 0.27, 0.25, 0.23, 0.21, 0.19, 0.17, 0.15, 0.13, 0.11, 0.09, 0.07, 0.05, 0.03, 0.01, 0.99, 0.97, 0.95, 0.93, 0.91, 0.89, 0.87, 0.85, 0.83, 0.81, 0.79, 0.77, 0.75, 0.73, 0.71, 0.69, 0.67, 0.65, 0.63, 0.61, 0.59, 0.57, 0.55, 0.53, 0.51, 0.49, 0.47, 0.45, 0.43, 0.41, 0.39, 0.37, 0.35, 0.33, 0.31, 0.29, 0.27, 0.25, 0.23, 0.21, 0.19, 0.17, 0.15, 0.13, 0.11, 0.09, 0.07, 0.05, 0.03, 0.01, 0.99, 0.97, 0.95, 0.93, 0.91, 0.89, 0.87, 0.85, 0.83, 0.81, 0.79, 0.77, 0.75, 0.73, 0.71, 0.69, 0.67, 0.65, 0.63, 0.61, 0.59, 0.57, 0.55, 0.53, 0.51, 0.49, 0.47, 0.45, 0.43, 0.41, 0.39, 0.37, 0.35, 0.33,

**<sup>19</sup>F NMR Spectrum of (*E*)-3,3,4,4,5,5,5-heptafluoro-1-(3-iodophenyl)-2-propylpen-1-en-1-yl trifluoromethanesulfonate 3j**

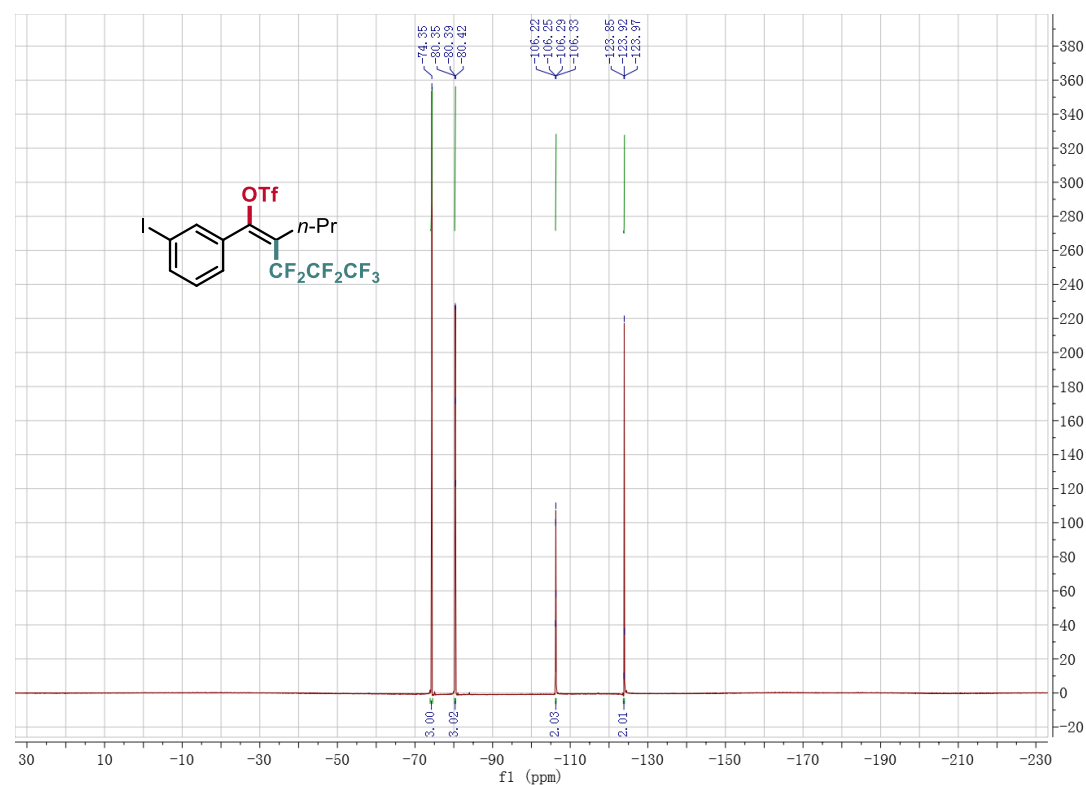

**<sup>1</sup>H NMR Spectrum of Ethyl (*E*)-3-(3,3,4,4,5,5,5-heptafluoro-2-propyl-1-(((trifluoromethyl)sulfonyl)oxy)pent-1-en-1-yl)benzoate 3k**

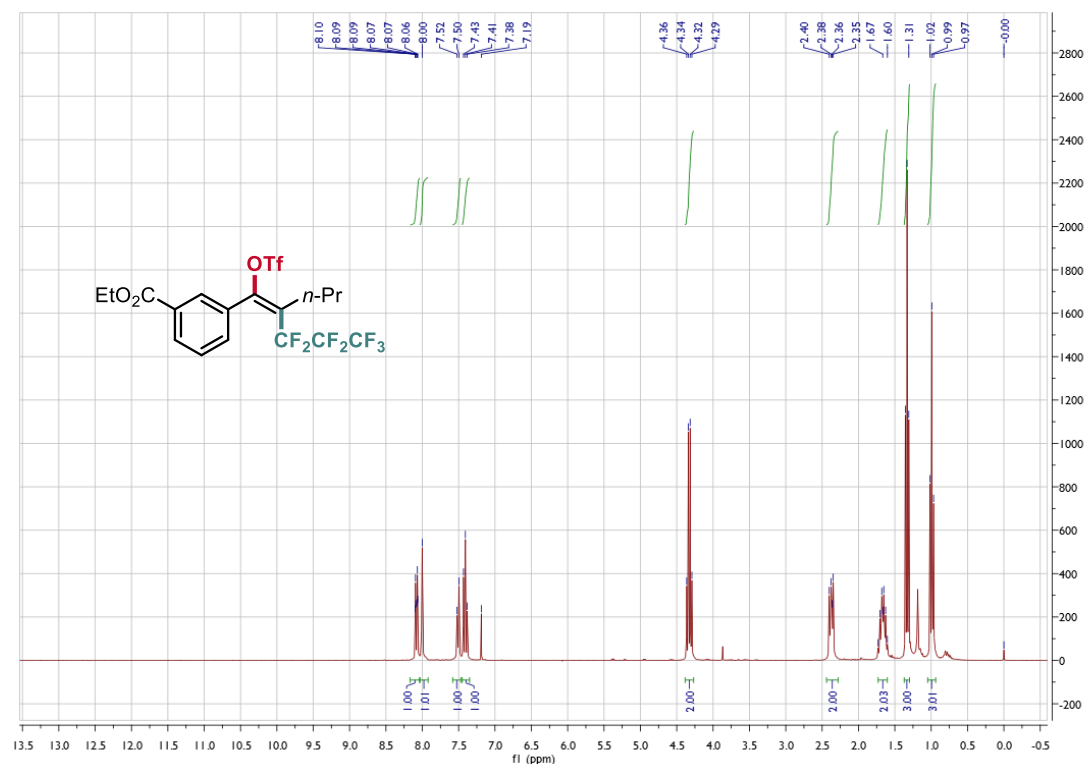

**<sup>13</sup>C NMR Spectrum of Ethyl (*E*)-3-(3,3,4,4,5,5,5-heptafluoro-2-propyl-1-(((trifluoromethyl)sulfonyl)oxy)pent-1-en-1-yl)benzoate 3k**

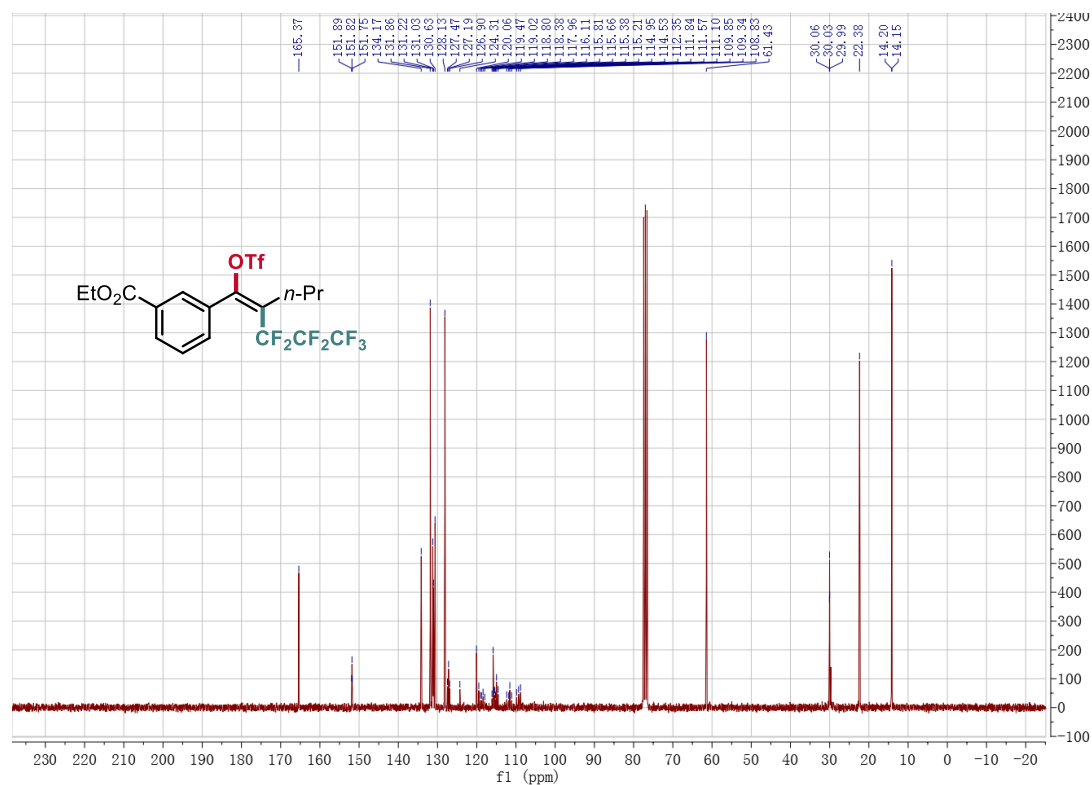

**$^{19}\text{F}$  NMR Spectrum of Ethyl (*E*)-3-(3,3,4,4,5,5,5-heptafluoro-2-propyl-1-(((trifluoromethyl)sulfonyl)oxy)pent-1-en-1-yl)benzoate 3k**

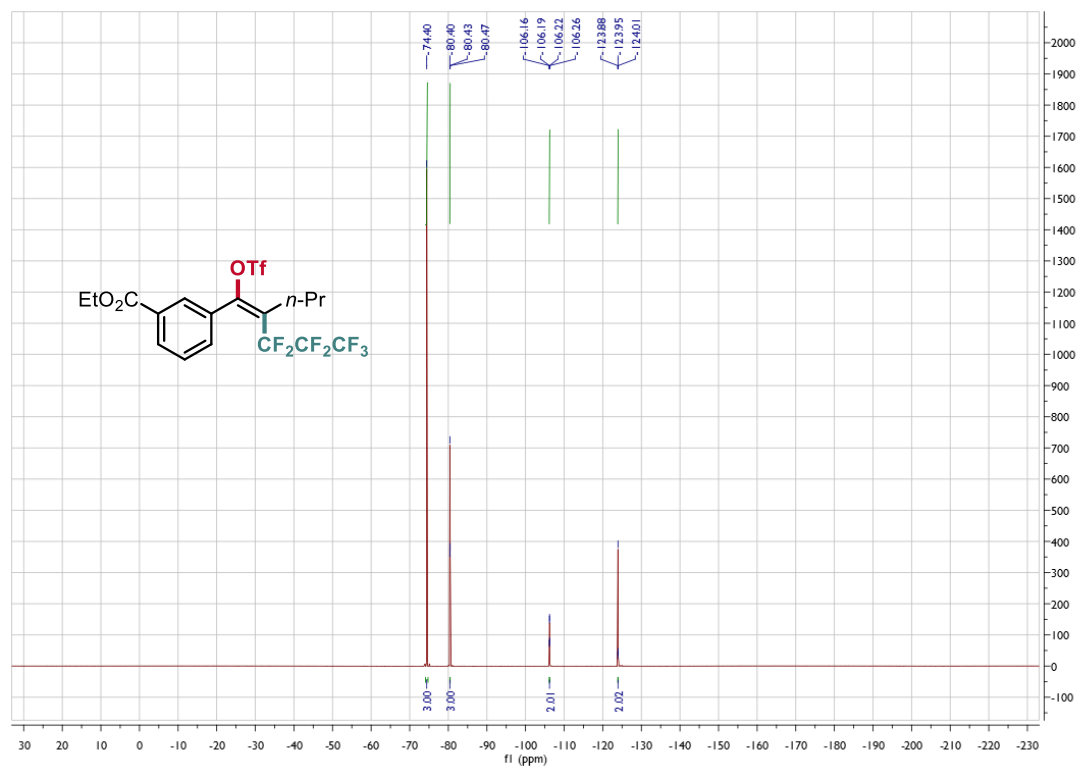

**<sup>1</sup>H NMR Spectrum of (*E*)-3,3,4,4,5,5,5-heptafluoro-1-(3-formylphenyl)-2-propyl pent-1-en-1-yl trifluoromethanesulfonate 3l**

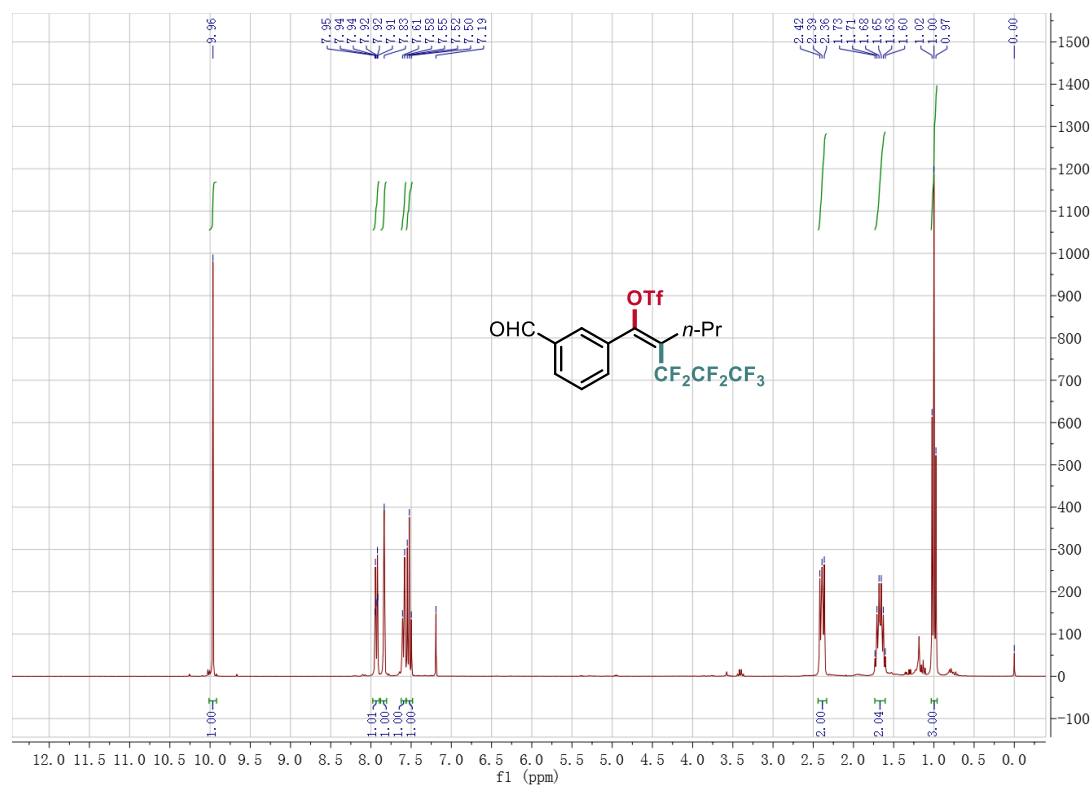

**<sup>13</sup>C NMR Spectrum of (*E*)-3,3,4,4,5,5,5-heptafluoro-1-(3-formylphenyl)-2-propyl pent-1-en-1-yl trifluoromethanesulfonate 3l**

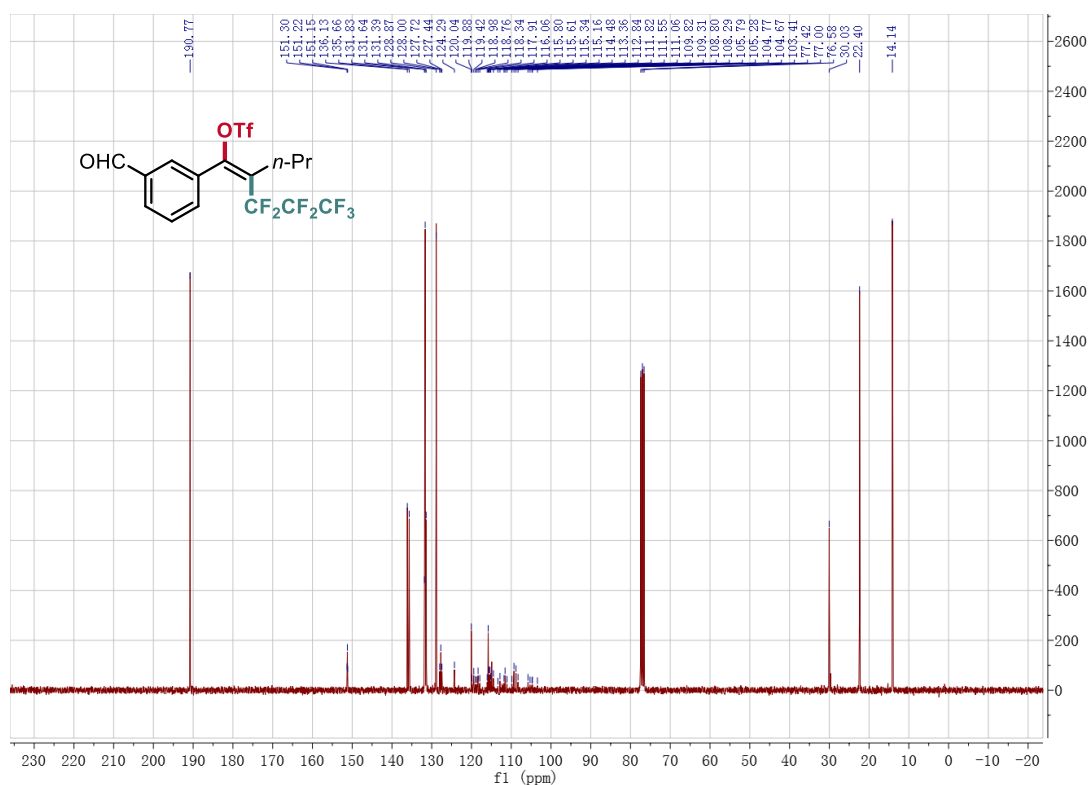

**$^{19}\text{F}$  NMR Spectrum of (*E*)-3,3,4,4,5,5,5-heptafluoro-1-(3-formylphenyl)-2-propyl pent-1-en-1-yl trifluoromethanesulfonate 3l**

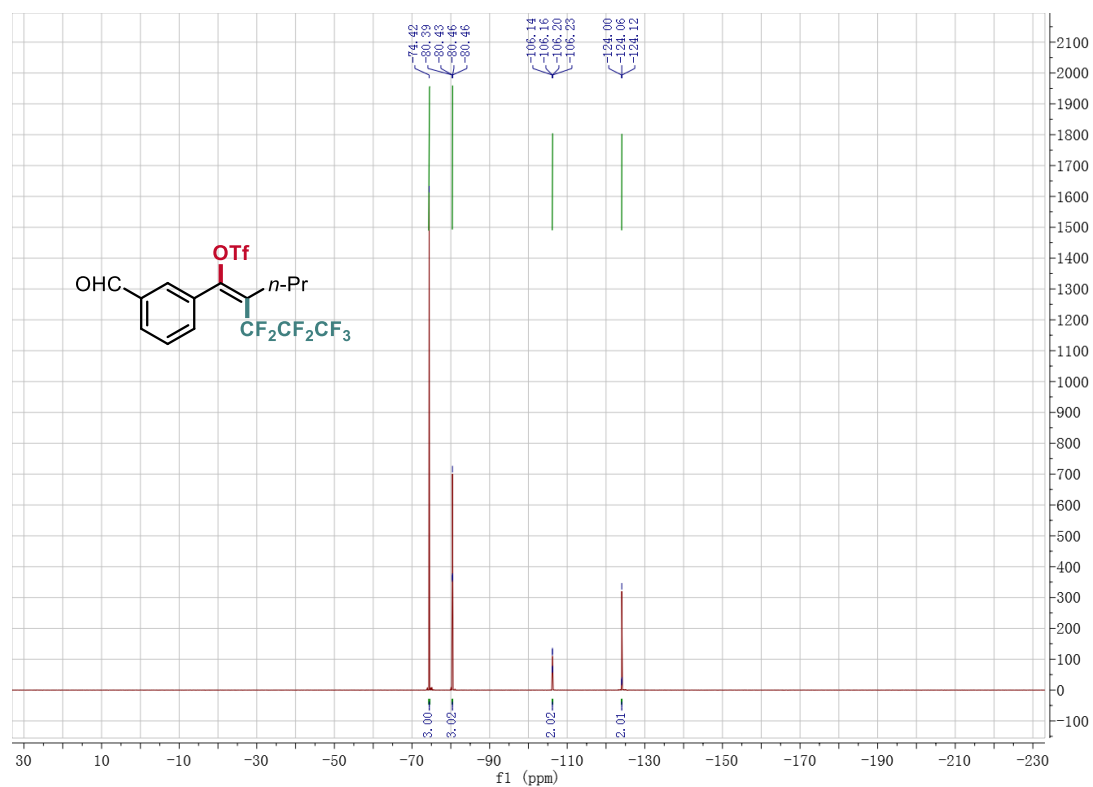

[illegible]

**$^{19}\text{F}$  NMR Spectrum of (*E*)-1-(3,5-dibromophenyl)-3,3,4,4,5,5,5-heptafluoro-2-propylpent-1-en-1-yl trifluoromethanesulfonate 3m**

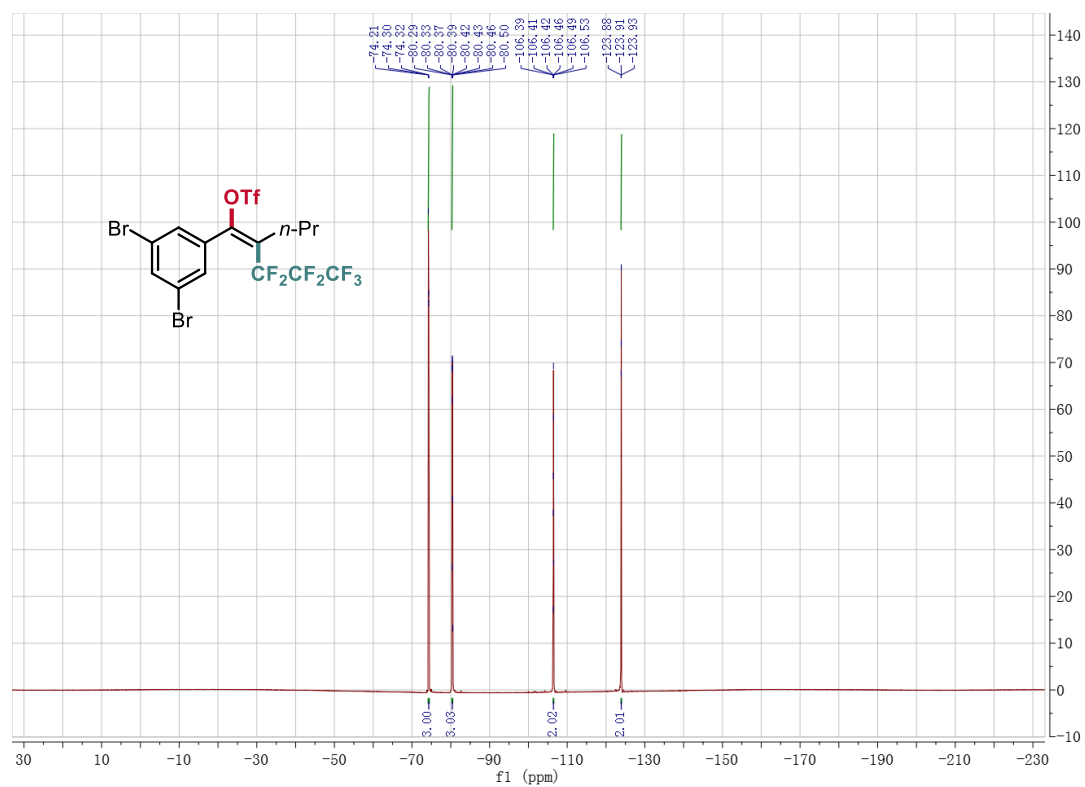

**$^{19}\text{F}$  NMR Spectrum of (*E*)-3,3,4,4,5,5,5-heptafluoro-2-propyl-1-(*o*-tolyl)pent-1-en-1-yl trifluoromethanesulfonate 3n**

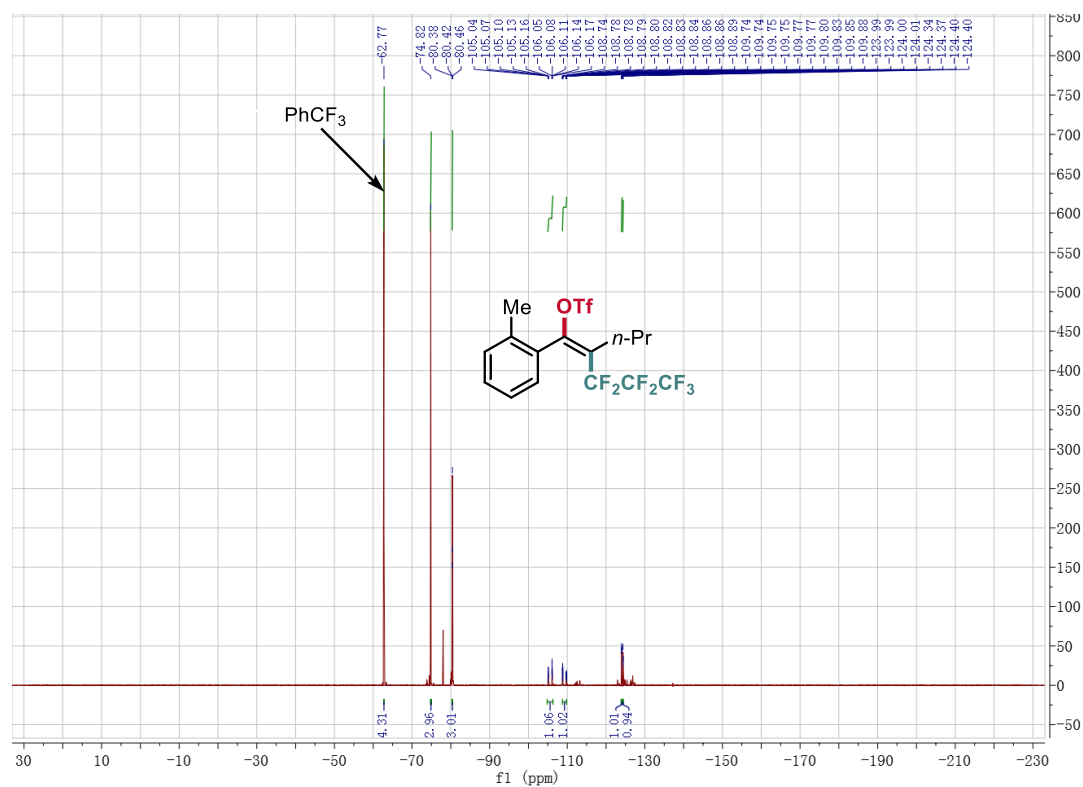

Chemical structure: Brc1ccncc1C(=C(CF2CF2CF3)C)OC(F)(F)F

<sup>1</sup>H NMR spectrum (CDCl<sub>3</sub>) showing peaks in the aromatic region (7.1-8.8 ppm) and aliphatic region (0.9-2.5 ppm). Integration values are provided for several peaks.

| Chemical Shift (ppm) | Integration |
|----------------------|-------------|
| 8.71                 | 1.00        |
| 8.48                 | 1.00        |
| 7.80                 | 0.99        |
| 7.19                 | 0.99        |
| 2.42                 | 2.00        |
| 2.37                 | 2.03        |
| 1.64                 | 3.00        |

**$^{19}\text{F}$  NMR Spectrum of (*E*)-1-(5-bromopyridin-3-yl)-3,3,4,4,5,5,5-heptafluoro-2-propylpent-1-en-1-yl trifluoromethanesulfonate **3o****

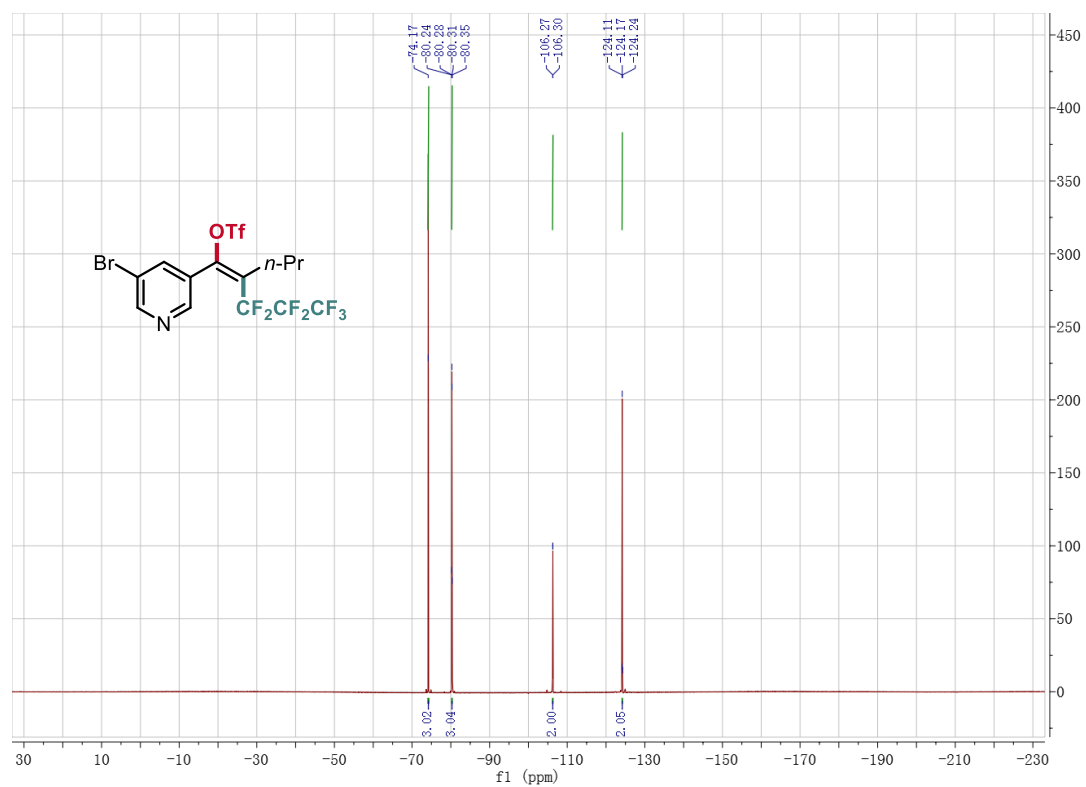



**$^{19}\text{F}$  NMR Spectrum of (*E*)-1-(4-cyanothiophen-3-yl)-3,3,4,4,5,5,5-heptafluoro-2-propylpent-1-en-1-yl trifluoromethanesulfonate 3p**

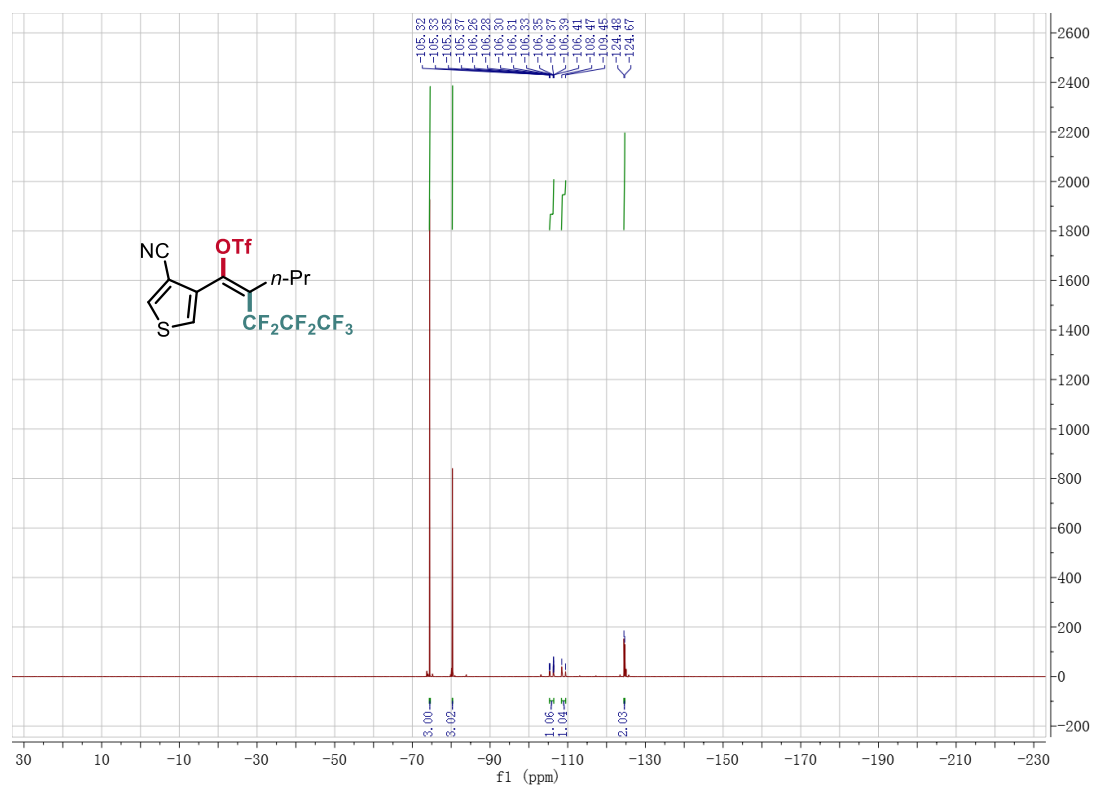

**<sup>1</sup>H NMR Spectrum of (*E*)-3,3,4,4,5,5,5-heptafluoro-1,2-diphenylpent-1-en-1-yl trifluoromethanesulfonate 3q**

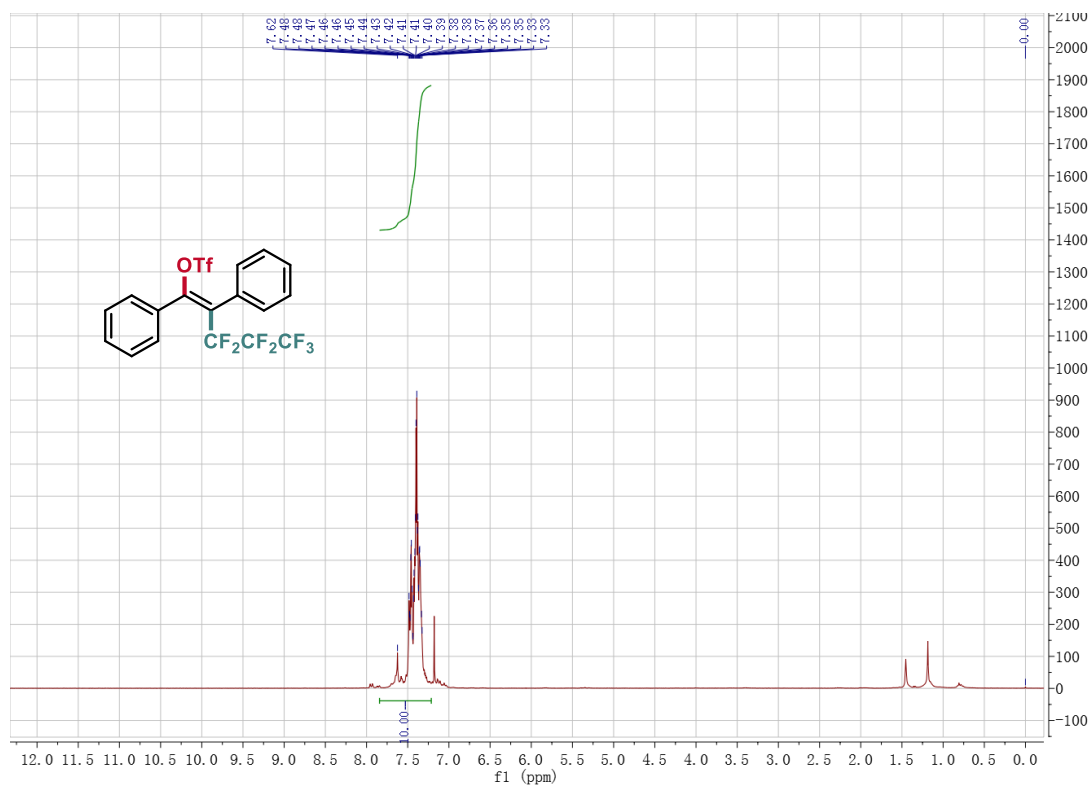

**<sup>13</sup>C NMR Spectrum of (*E*)-3,3,4,4,5,5,5-heptafluoro-1,2-diphenylpent-1-en-1-yl trifluoromethanesulfonate 3q**

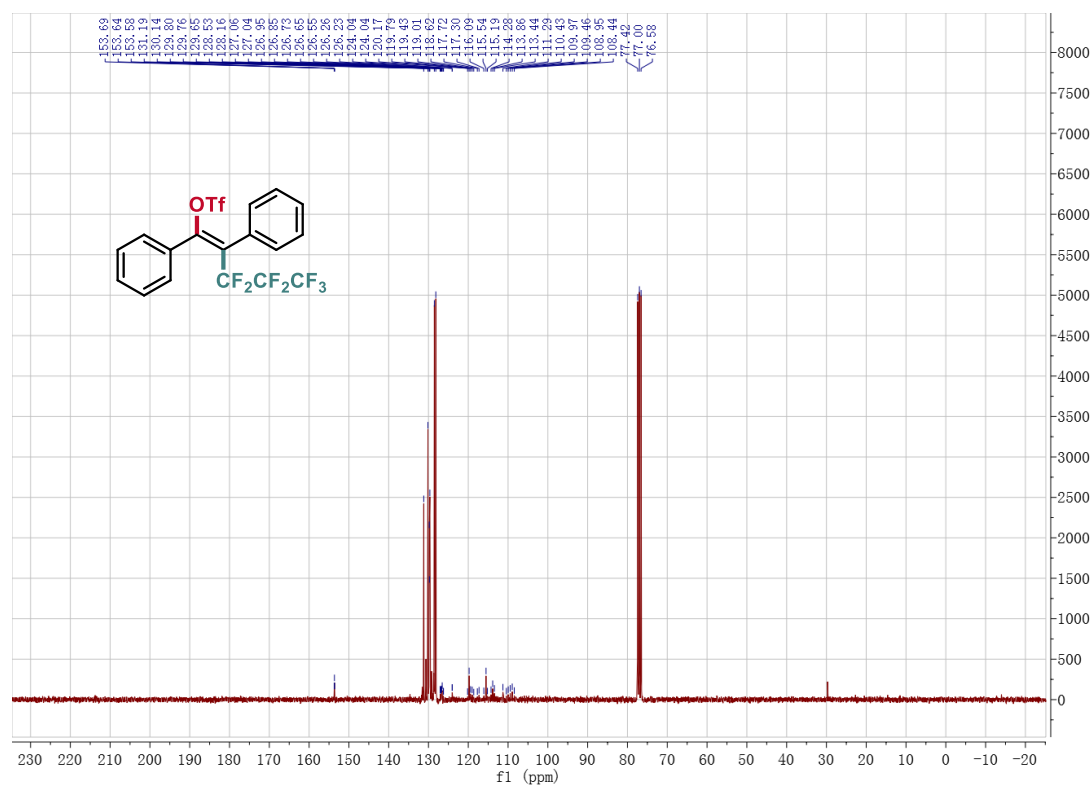

**<sup>19</sup>F NMR Spectrum of (*E*)-3,3,4,4,5,5,5-heptafluoro-1,2-diphenylpent-1-en-1-yl trifluoromethanesulfonate 3q**

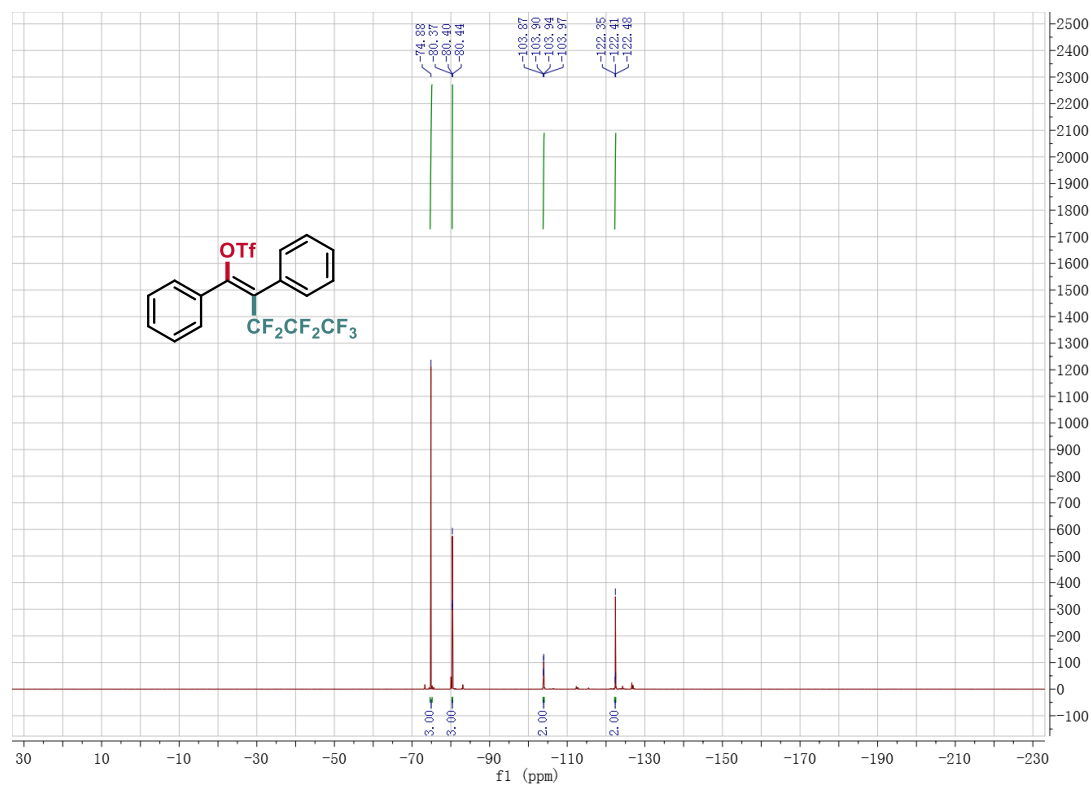

**<sup>1</sup>H NMR Spectrum of Diethyl 4,4'-(3,3,4,4,5,5,5-heptafluoro-1-(((trifluoromethyl)sulfonyl)oxy)pent-1-ene-1,2-diyl)(E)-dibenzoate 3r**

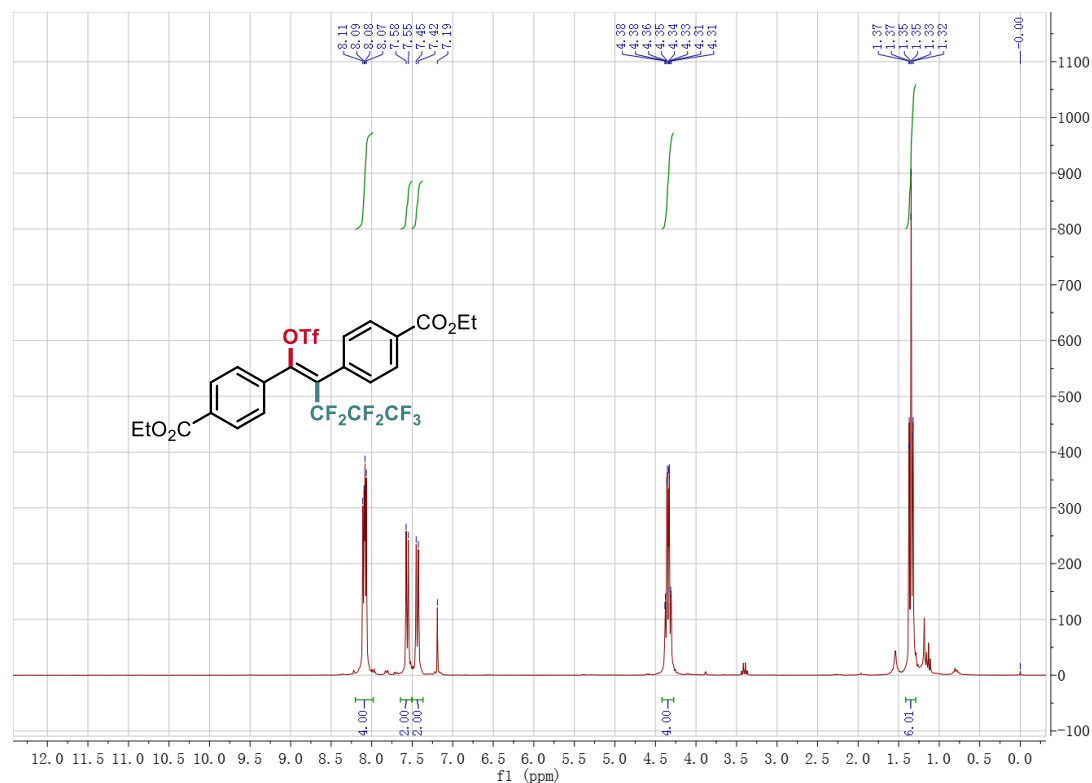

**<sup>13</sup>C NMR Spectrum of Diethyl 4,4'-(3,3,4,4,5,5,5-heptafluoro-1-(((trifluoromethyl)sulfonyl)oxy)pent-1-ene-1,2-diyl)(E)-dibenzoate 3r**

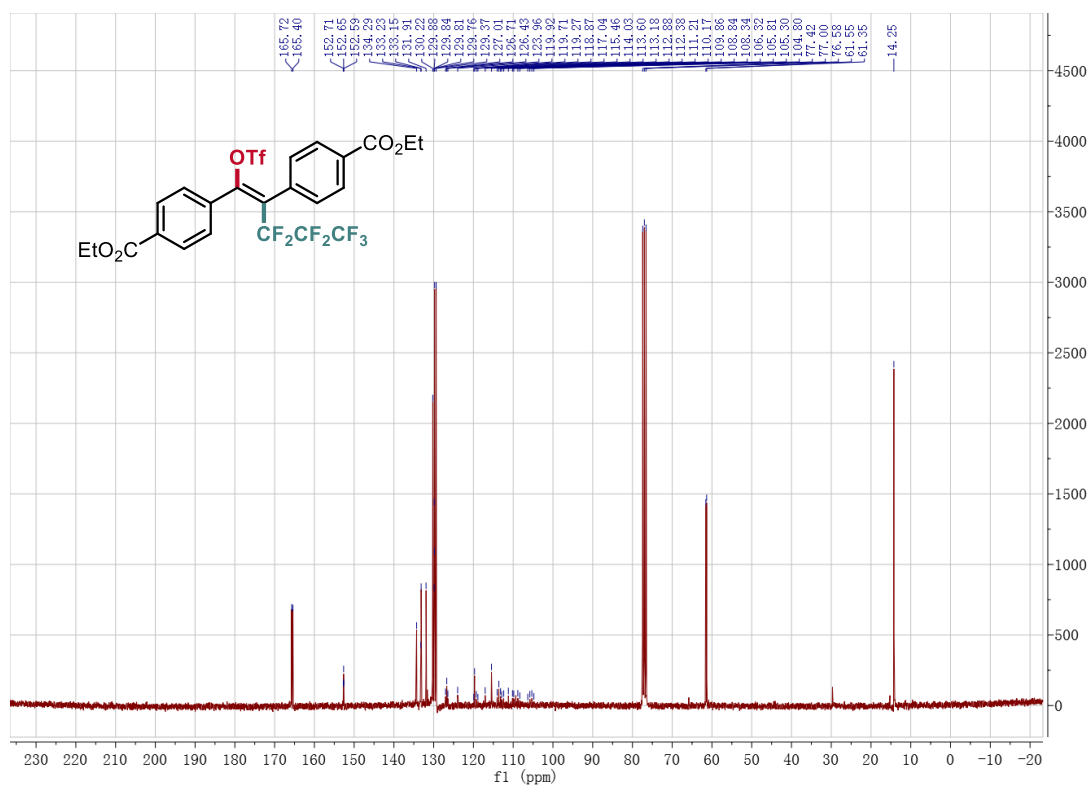

**$^{19}\text{F}$  NMR Spectrum of Diethyl 4,4'-(3,3,4,4,5,5,5-heptafluoro-1-(((trifluoromethyl)sulfonyl)oxy)pent-1-ene-1,2-diyl)(*E*)-dibenzoate 3r**

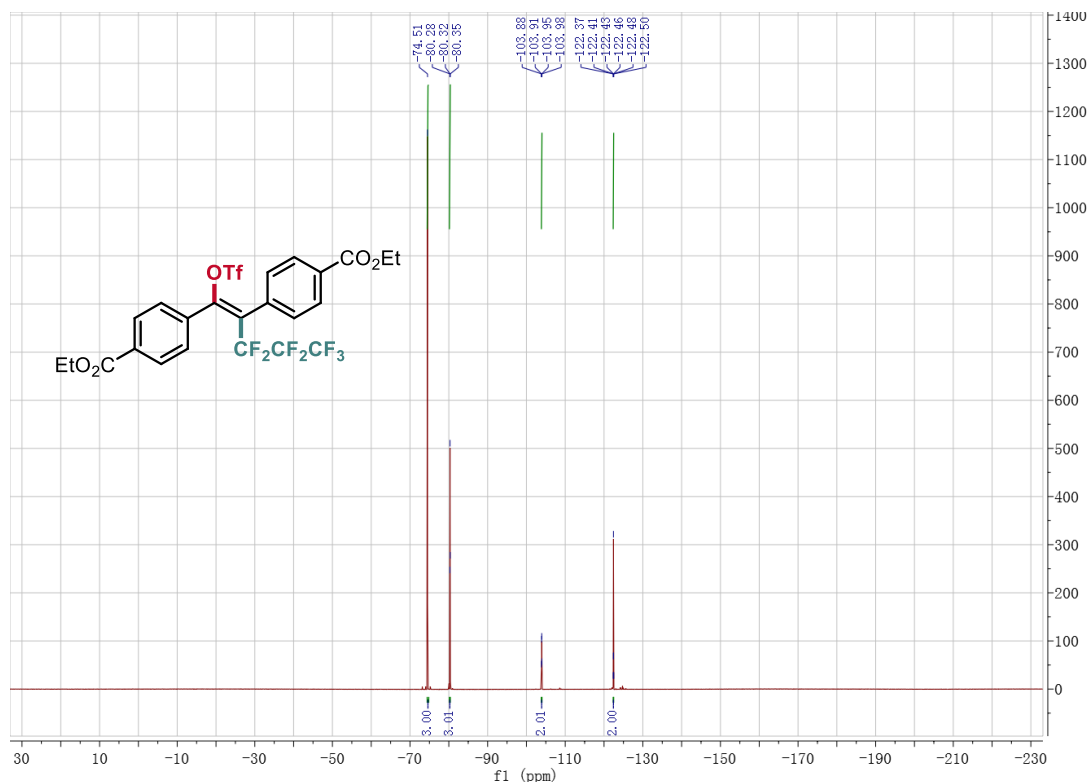

**$^{19}\text{F}$ - $^1\text{H}$  HOESY NMR Spectrum of Diethyl 4,4'-(3,3,4,4,5,5,5-heptafluoro-1-(((trifluoromethyl)sulfonyl)oxy)pent-1-ene-1,2-diyl)(*E*)-dibenzoate 3r**

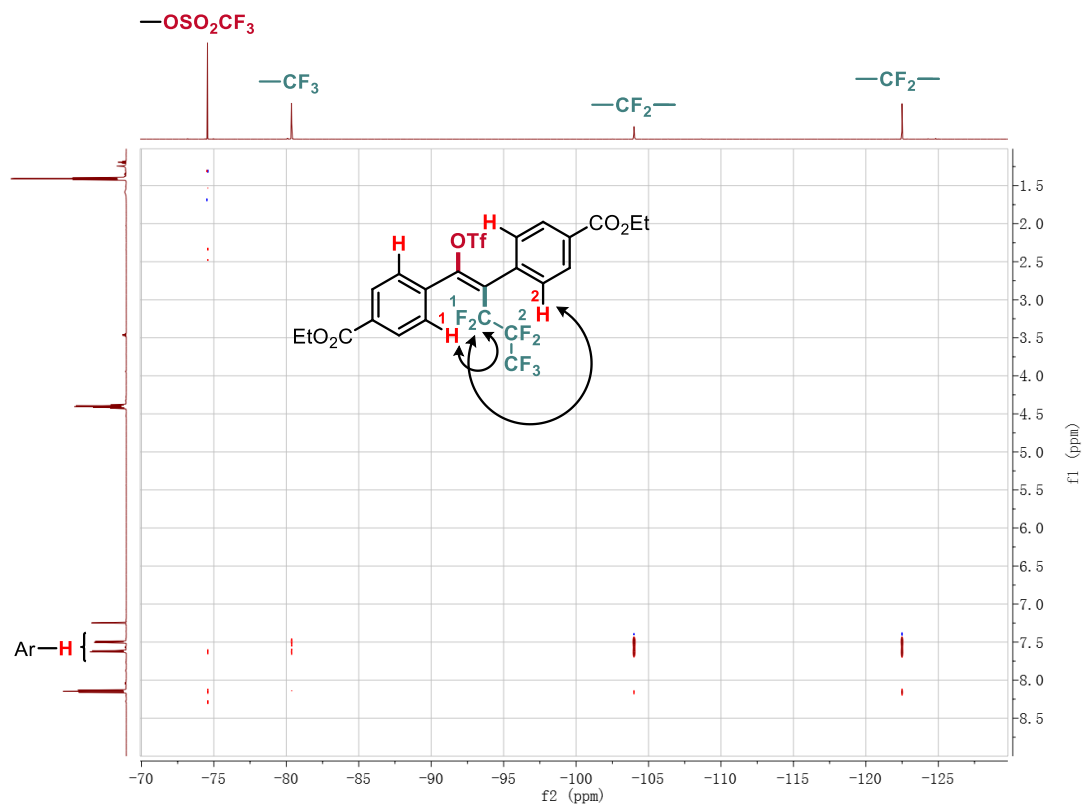

**<sup>1</sup>H NMR Spectrum of Ethyl (*E*)-4-(3,3,4,4,5,5,5-heptafluoro-2-methyl-1-(((trifluoromethyl)sulfonyl)oxy)pent-1-en-1-yl)benzoate 3s**

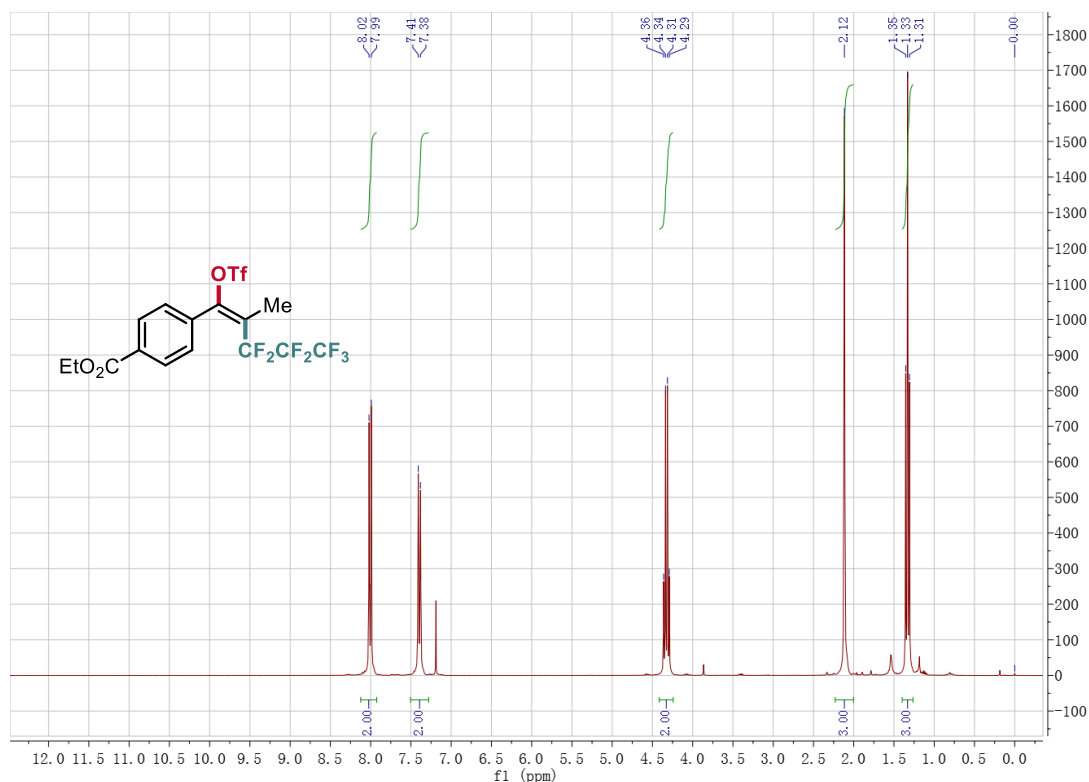

**<sup>13</sup>C NMR Spectrum of Ethyl (*E*)-4-(3,3,4,4,5,5,5-heptafluoro-2-methyl-1-(((trifluoromethyl)sulfonyl)oxy)pent-1-en-1-yl)benzoate 3s**

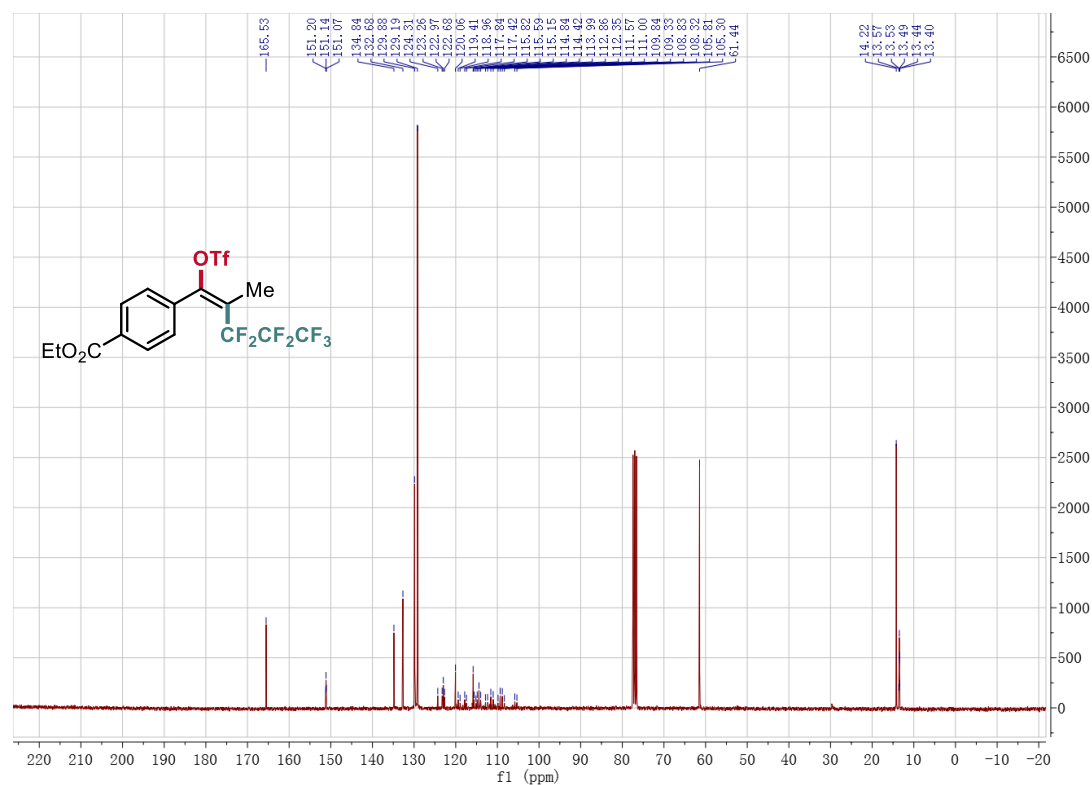

Chemical structure: CCOC(=O)c1ccc(cc1)/C(=C/C(F)(F)F)/C(F)(F)F

<sup>13</sup>C NMR spectrum (ppm):

| Chemical Shift (ppm) | Integration |
|----------------------|-------------|
| -74.33               | 3.00        |
| -80.53               | 3.00        |
| -107.21              | 2.01        |
| -107.32              | 2.00        |
| -124.31              | 2.00        |
| -124.45              | 2.00        |

**<sup>1</sup>H NMR Spectrum of Ethyl (*E*)-4-(2-cyclopropyl-3,3,4,4,5,5,5-heptafluoro-1-(((trifluoromethyl)sulfonyl)oxy)pent-1-en-1-yl)benzoate 3t**

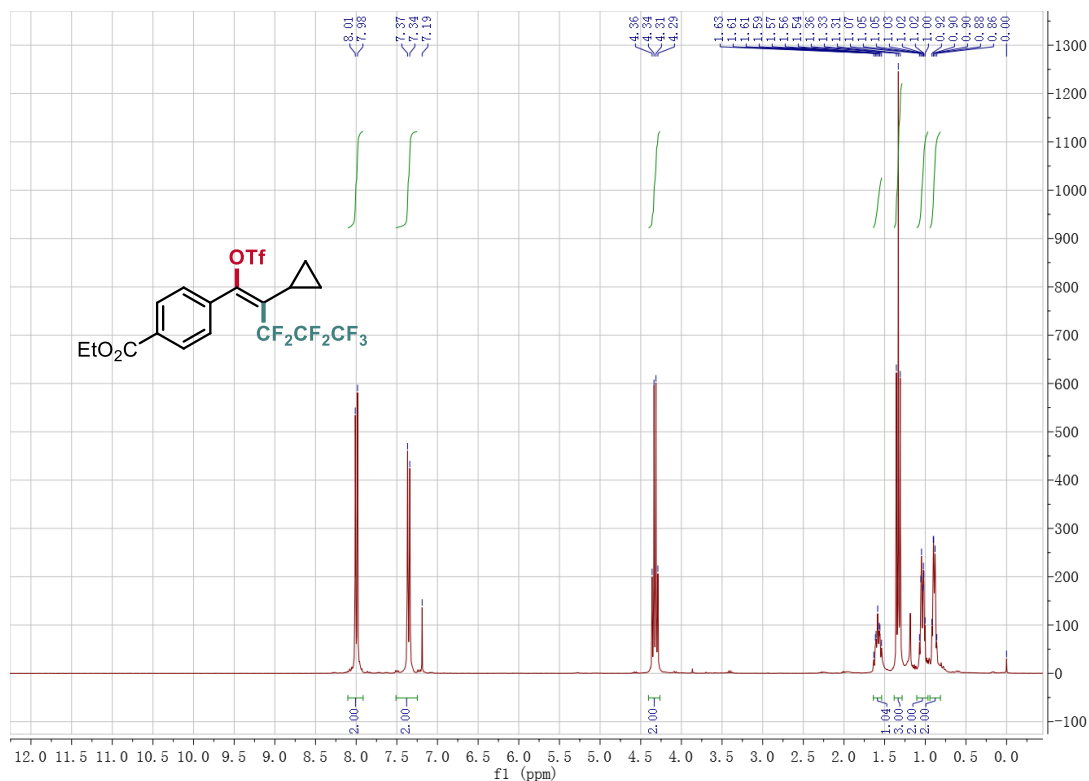

**<sup>13</sup>C NMR Spectrum of Ethyl (*E*)-4-(2-cyclopropyl-3,3,4,4,5,5,5-heptafluoro-1-(((trifluoromethyl)sulfonyl)oxy)pent-1-en-1-yl)benzoate 3t**

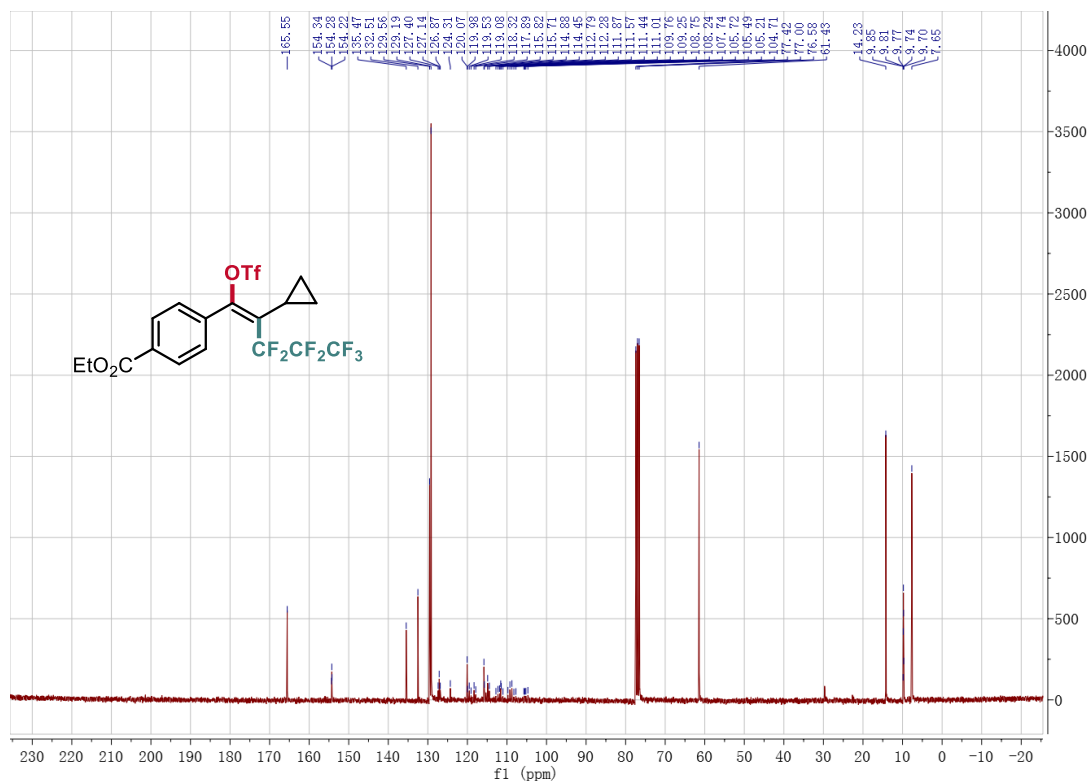

**$^{19}\text{F}$  NMR Spectrum of Ethyl (*E*)-4-(2-cyclopropyl-3,3,4,4,5,5,5-heptafluoro-1-(((trifluoromethyl)sulfonyl)oxy)pent-1-en-1-yl)benzoate 3t**

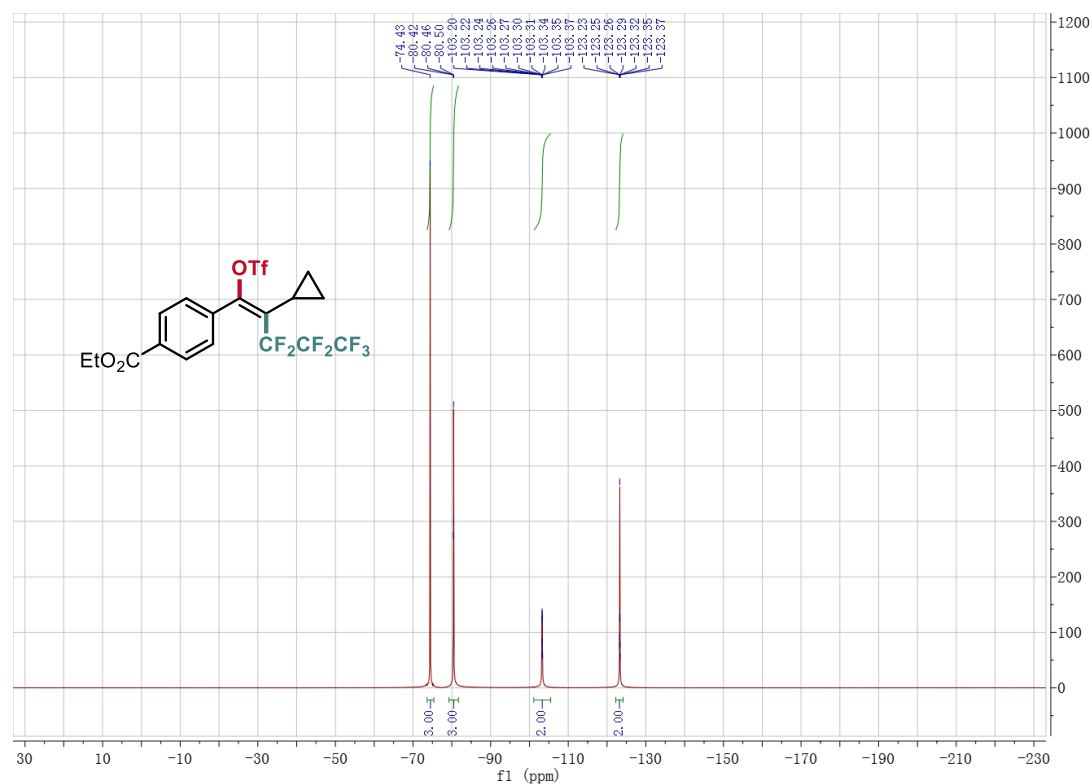

Chemical structure: CC(=C(C(F)(F)F)C(F)(F)F)C(=O)OC1=CC=C(I)C=C1

<sup>1</sup>H NMR spectrum (CDCl<sub>3</sub>) showing peaks at 7.80, 7.77, 7.19, 7.15, 7.12, 1.95, and 0.00 ppm. Integration values are 2.01, 2.00, and 3.00.

Chemical structure: CC(=C(C(F)(F)F)C(=O)OC1=CC=C(I)C=C1)OC(F)(F)F

<sup>13</sup>C NMR spectrum (ppm):

- 193.08
- 138.59
- 138.07
- 136.83
- 134.88
- 134.57
- 134.31
- 134.27
- 134.25
- 134.23
- 130.96
- 127.71
- 116.44
- 116.11
- 115.99
- 115.81
- 115.72
- 113.97
- 112.99
- 112.66
- 112.54
- 112.18
- 112.02
- 111.87
- 111.56
- 77.42
- 77.00
- 76.58
- 31.35

**$^{19}\text{F}$  NMR Spectrum of (*E*)-2-acetyl-3,3,4,4,5,5,5-heptafluoro-1-(4-iodophenyl)pent-1-en-1-yl trifluoromethanesulfonate 3u**

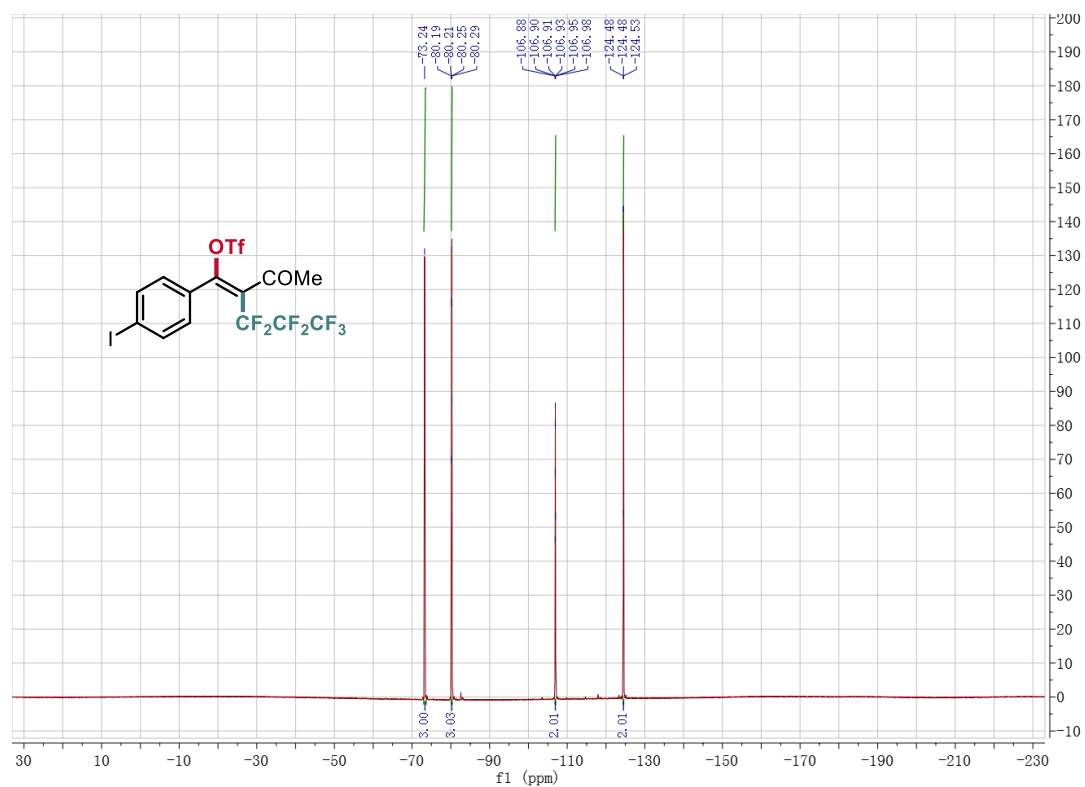

**<sup>1</sup>H NMR spectrum (CDCl<sub>3</sub>) of methyl 2-(4-ethoxyphenyl)-2-(trifluoromethyl)acrylate.**

**Chemical structure:** CCOC(=O)C1=CC=C(C=C1)C(=C(C(F)(F)F)C(F)(F)F)C(F)(F)F

**Peak Data:**

| Chemical Shift (ppm) | Integration |
|----------------------|-------------|
| 8.07, 8.04           | 2.00        |
| 7.50, 7.47, 7.19     | 2.00        |
| 7.26 (solvent)       | -           |
| 4.38, 4.33, 4.30     | 2.00        |
| 3.89                 | 3.00        |
| 1.36, 1.34, 1.32     | 3.01        |
| -0.00 (TMS)          | -           |

Chemical structure of methyl 2-(4-ethoxyphenyl)-2-(trifluoromethyl)acrylate is shown. The structure features a central carbon atom bonded to a trifluoromethyl group (CF<sub>3</sub>), a methoxycarbonyl group (CO<sub>2</sub>Me), and a 4-ethoxyphenyl group (C<sub>6</sub>H<sub>4</sub>CO<sub>2</sub>Et). The trifluoromethyl group is highlighted in blue in the original image.

The <sup>13</sup>C NMR spectrum (f1 (ppm)) displays the following chemical shifts (ppm):

- 165.22, 163.71, 159.97, 159.93, 159.09, 155.02, 153.15, 153.71, 152.52, 149.74, 149.35, 148.23, 147.62, 141.19, 131.19, 130.86, 129.98, 119.98, 119.73, 119.73, 118.83, 118.83, 116.38, 116.38, 115.92, 115.73, 115.73, 115.02, 115.02, 112.92, 112.47, 112.03, 111.98, 111.98, 109.75, 109.02, 108.87, 108.36, 107.86, 107.86, 105.33, 104.82, 104.82, 77.00, 77.42, 76.58, 61.63, 53.74, 14.21.

**$^{19}\text{F}$  NMR Spectrum of Ethyl (*E*)-4-(3,3,4,4,5,5,5-heptafluoro-2-(methoxycarbonyl)-1-(((trifluoromethyl)sulfonyl)oxy) pent-1-en-1-yl)benzoate 3v**

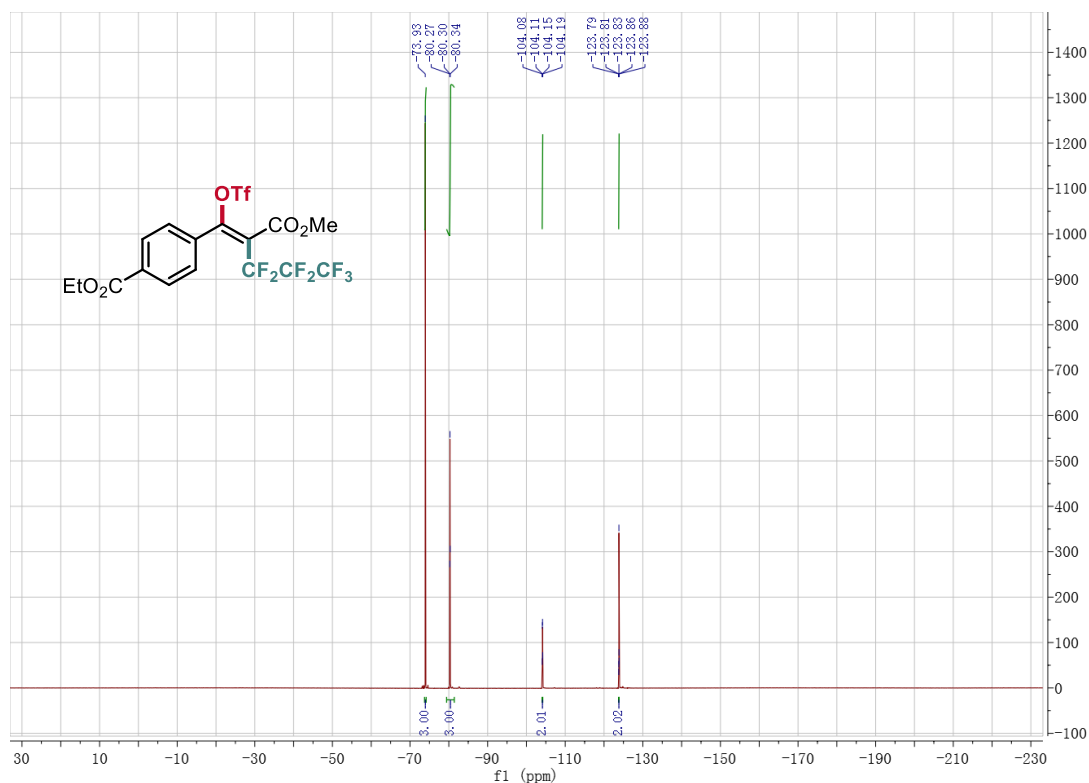

**$^{19}\text{F}$ - $^1\text{H}$  HOESY NMR Spectrum of Ethyl (*E*)-4-(3,3,4,4,5,5,5-heptafluoro-2-(methoxycarbonyl)-1-(((trifluoromethyl)sulfonyl)oxy) pent-1-en-1-yl)benzoate 3v:**

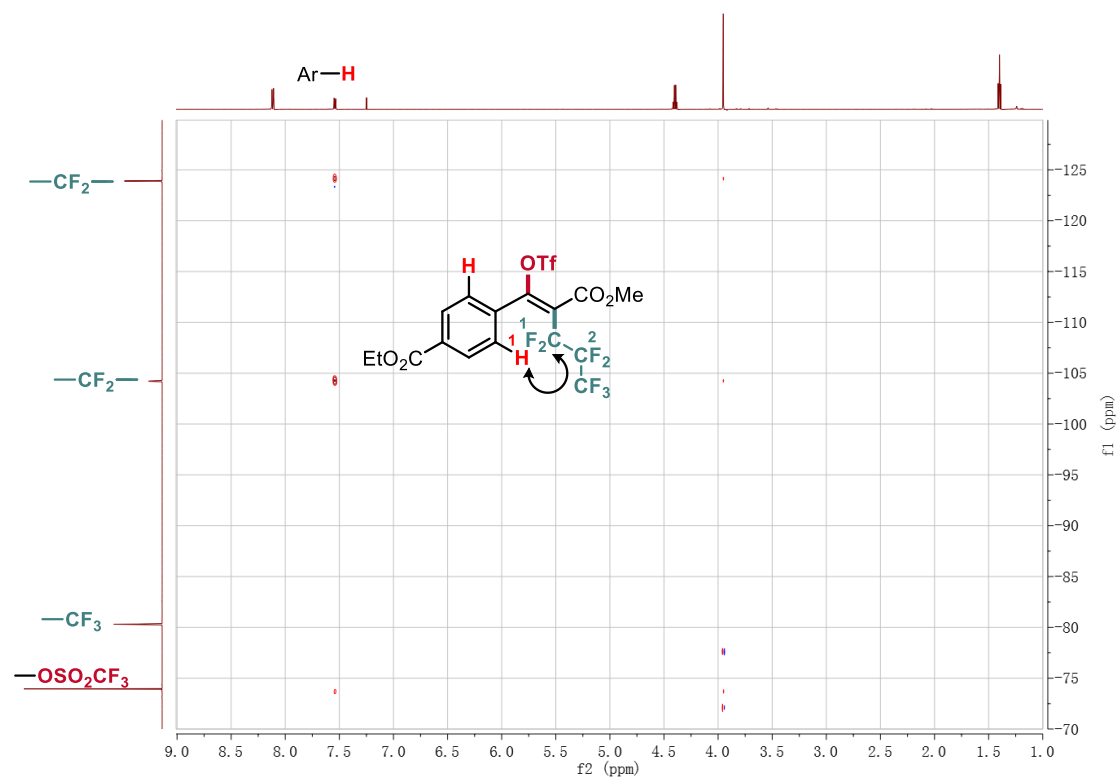

**<sup>1</sup>H NMR Spectrum of (*E*)-2-(dimethylcarbamoyl)-3,3,4,4,5,5,5-heptafluoro-1-phenyl pent-1-en-1-yl trifluoromethanesulfonate 3w**

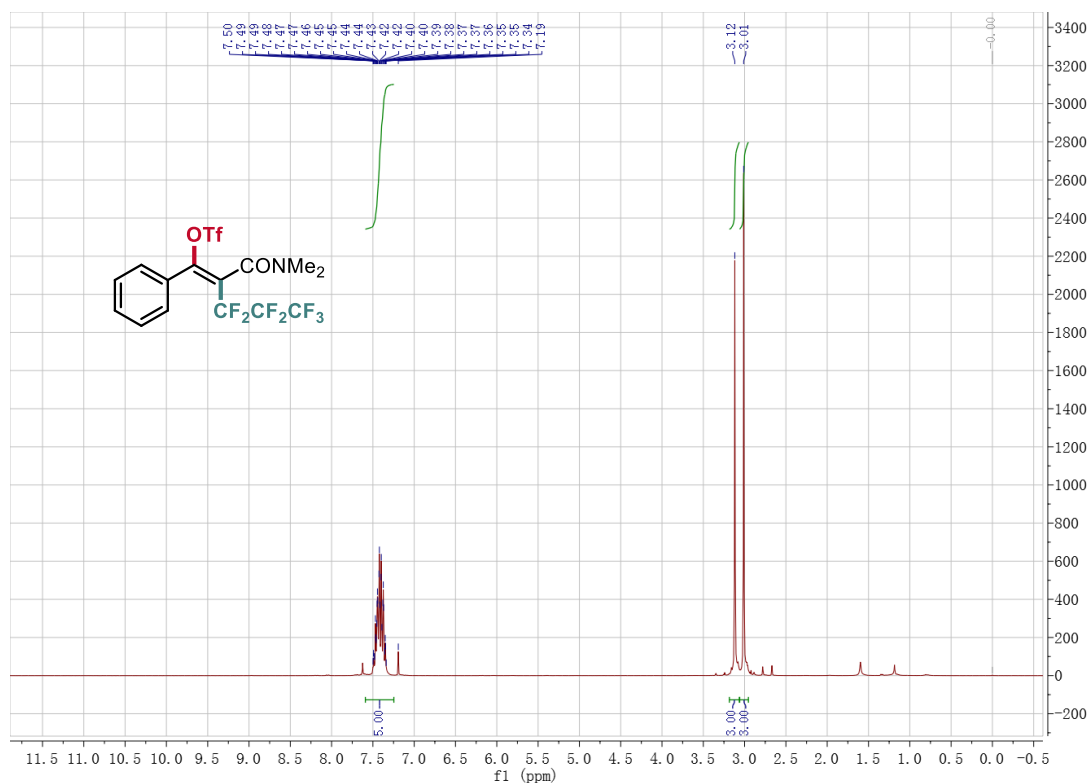

**<sup>13</sup>C NMR Spectrum of (*E*)-2-(dimethylcarbamoyl)-3,3,4,4,5,5,5-heptafluoro-1-phenyl pent-1-en-1-yl trifluoromethanesulfonate 3w**

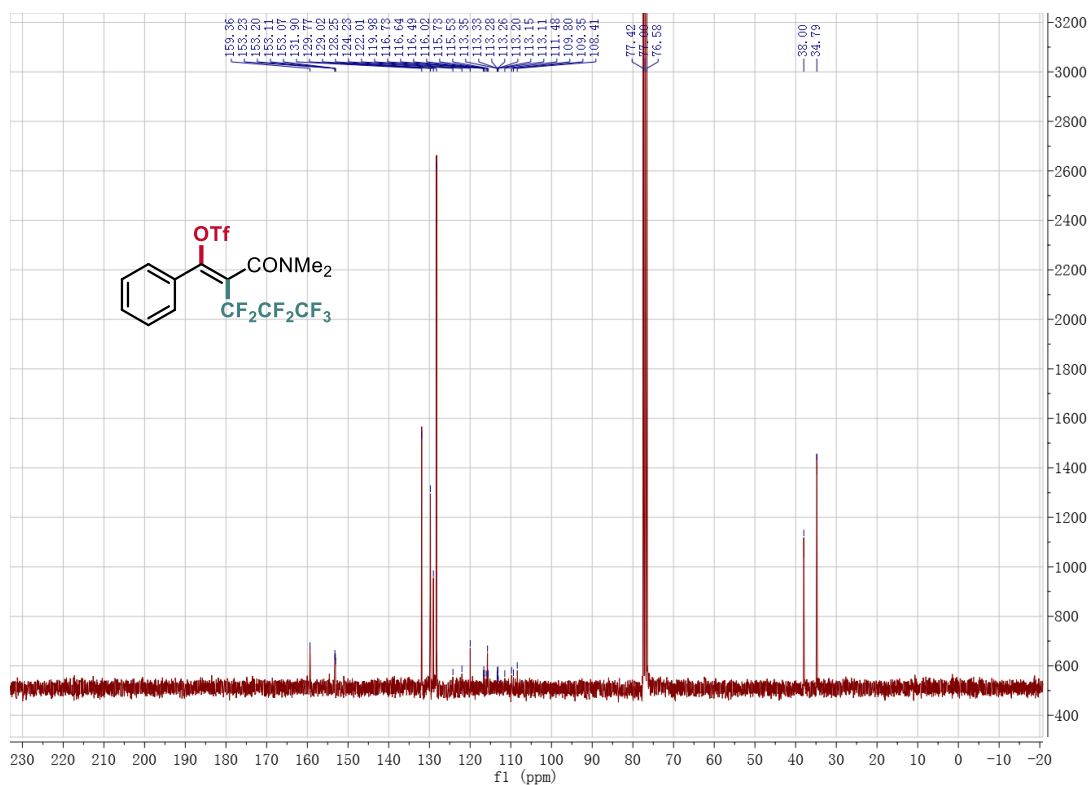

**$^{19}\text{F}$  NMR Spectrum of (*E*)-2-(dimethylcarbamoyl)-3,3,4,4,5,5,5-heptafluoro-1-phenyl pent-1-en-1-yl trifluoromethanesulfonate 3w**

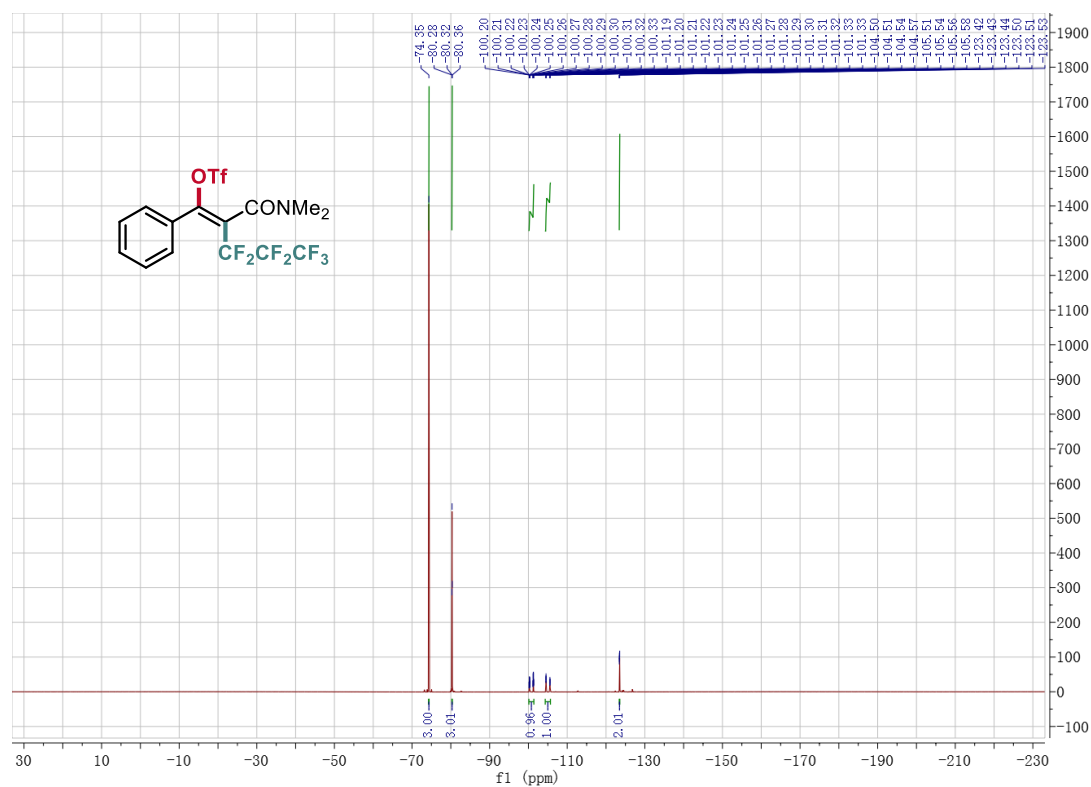

**Chemical Structure:** CCOC(=O)c1ccc(cc1)/C(=C/C(F)(F)F)/C(F)(F)F

**<sup>1</sup>H NMR Spectrum (CDCl<sub>3</sub>):**

| Chemical Shift (ppm) | Integration |
|----------------------|-------------|
| 7.98 (d)             | 2.00        |
| 7.41 (d)             | 2.00        |
| 7.19 (t)             | -           |
| 3.80 (s)             | 2.00        |
| 2.40 (q)             | 2.00        |
| 1.60 (m)             | 2.00        |
| 1.30 (m)             | 3.00        |
| 1.00 (t)             | 3.00        |

Chemical structure of compound 10: CCOC(=O)c1ccc(cc1)C(=C(CF2CF2CF2CF2CF2CF3)Cn)OC(F)(F)F

<sup>1</sup>H NMR spectrum (CDCl<sub>3</sub>) of compound 10. The spectrum shows peaks at the following chemical shifts (ppm): 165.55, 151.90, 134.78, 132.67, 130.19, 129.10, 128.10, 122.88, 120.06, 119.59, 119.50, 118.71, 118.60, 116.14, 115.83, 115.82, 115.25, 114.79, 112.25, 111.77, 110.22, 77.40, 76.58, 61.44, 30.05, 22.39, 14.20, and 14.11.

**Chemical Structure:** CCCCC/C=C(\C(=O)OCC)c1ccc(cc1)C(=O)OCC

**13C NMR Data (ppm):**

| Chemical Shift (ppm) | Integration |
|----------------------|-------------|
| 126.23               | 2.01        |
| 126.25               | 2.00        |
| 126.17               | 2.00        |
| 126.14               | 2.00        |
| 122.82               | 2.01        |
| 119.51               | 2.00        |
| 119.52               | 2.00        |
| 119.48               | 2.00        |
| 119.46               | 2.00        |
| 113.44               | 2.00        |
| 105.48               | 2.00        |
| 105.55               | 2.00        |
| 105.41               | 2.00        |
| 77.45                | 3.04        |
| 77.31                | 3.01        |
| 80.90                | -           |
| 80.91                | -           |
| 80.92                | -           |
| 80.93                | -           |
| 80.94                | -           |
| 80.95                | -           |
| 80.97                | -           |
| 80.98                | -           |
| 80.99                | -           |

**<sup>1</sup>H NMR Spectrum of Ethyl (*E*)-4-(3,3,4,4,5,5,6,6,7,7,8,8,9,9,10,10,10-heptafluoro-2-propyl-1-(((trifluoromethyl)sulfonyl)oxy)dec-1-en-1-yl)benzoate 3y**

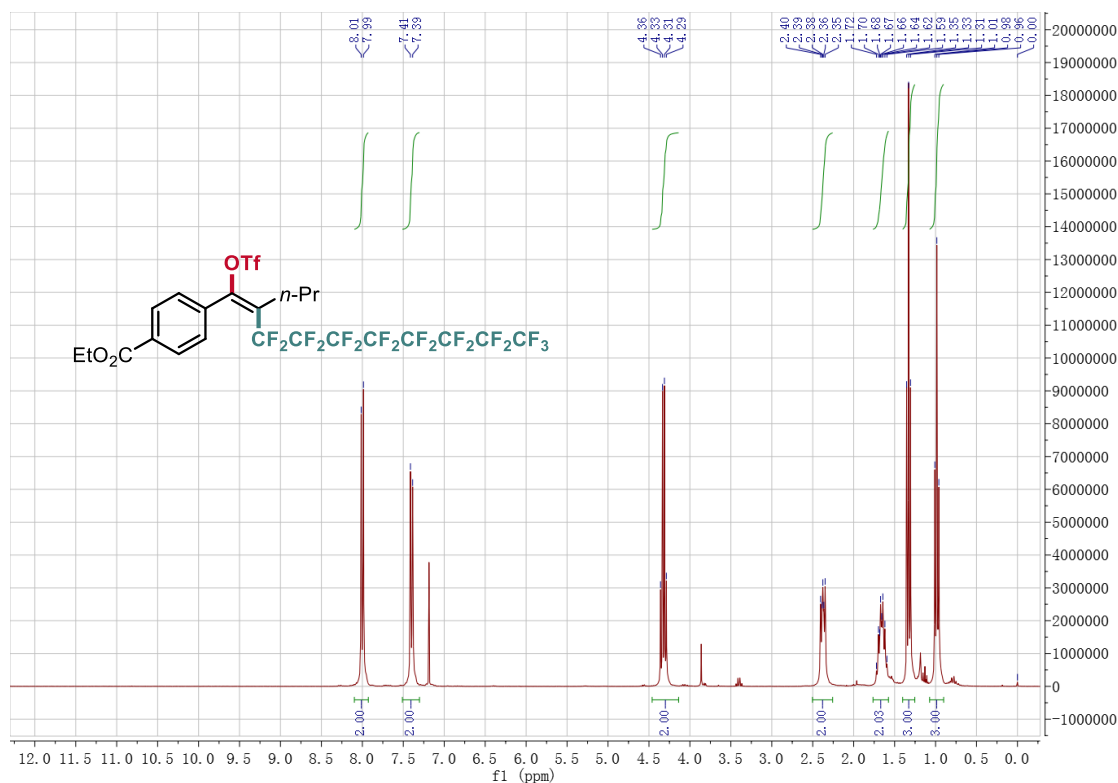

**<sup>13</sup>C NMR Spectrum of Ethyl (*E*)-4-(3,3,4,4,5,5,6,6,7,7,8,8,9,9,10,10,10-heptafluoro-2-propyl-1-(((trifluoromethyl)sulfonyl)oxy)dec-1-en-1-yl)benzoate 3y**

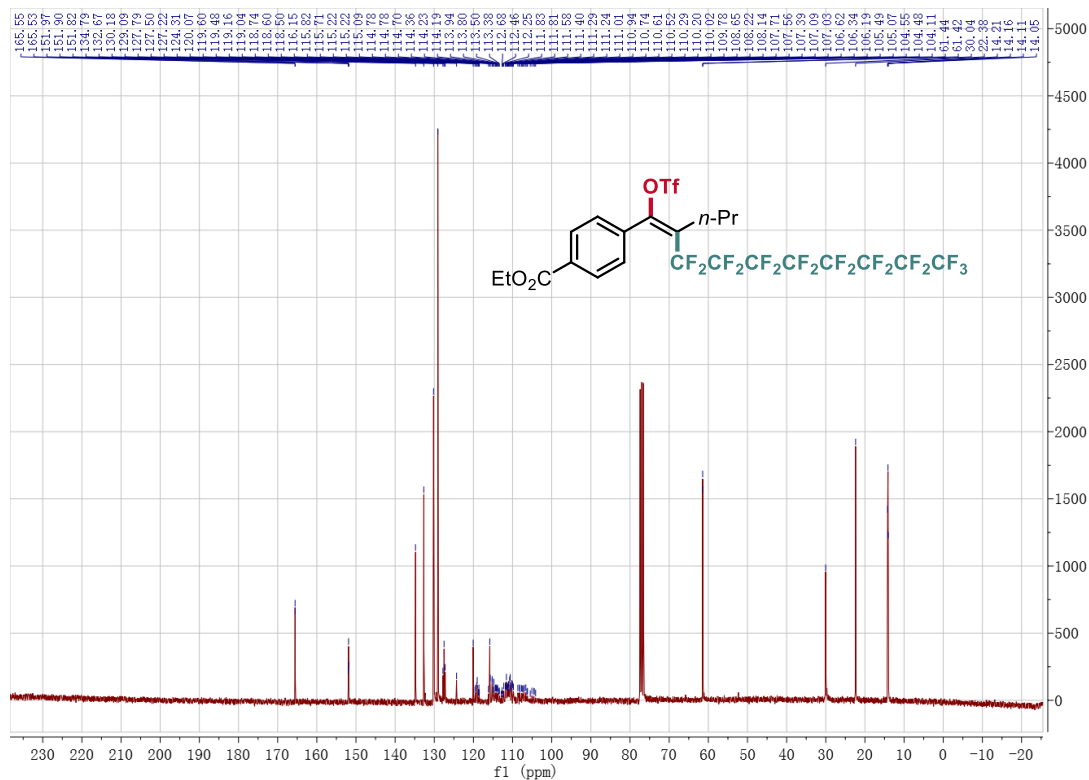

[illegible]

**<sup>1</sup>H NMR Spectrum of Diethyl 4,4'-(3,3,4,4,5,5,6,6,6-nonafluoro-1-(((trifluoromethyl)sulfonyl)oxy)hex-1-ene-1,2-diyl)(E)-dibenzoate 3z**

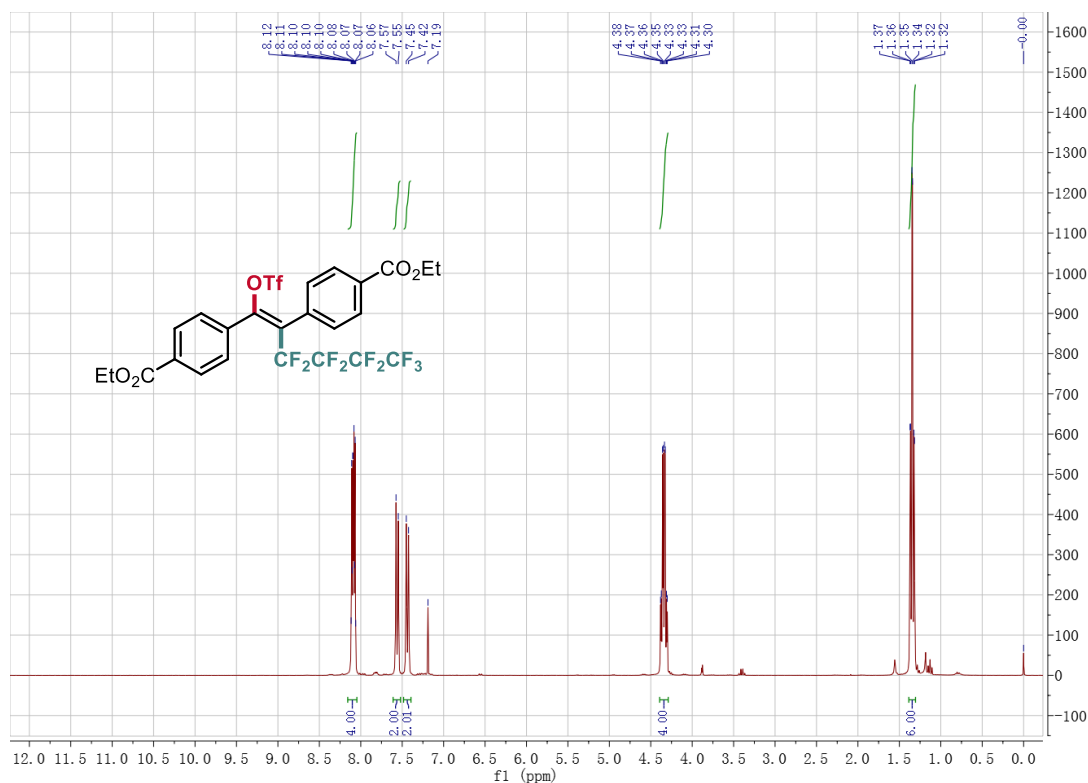

**<sup>13</sup>C NMR Spectrum of Diethyl 4,4'-(3,3,4,4,5,5,6,6,6-nonafluoro-1-(((trifluoromethyl)sulfonyl)oxy)hex-1-ene-1,2-diyl)(E)-dibenzoate 3z**

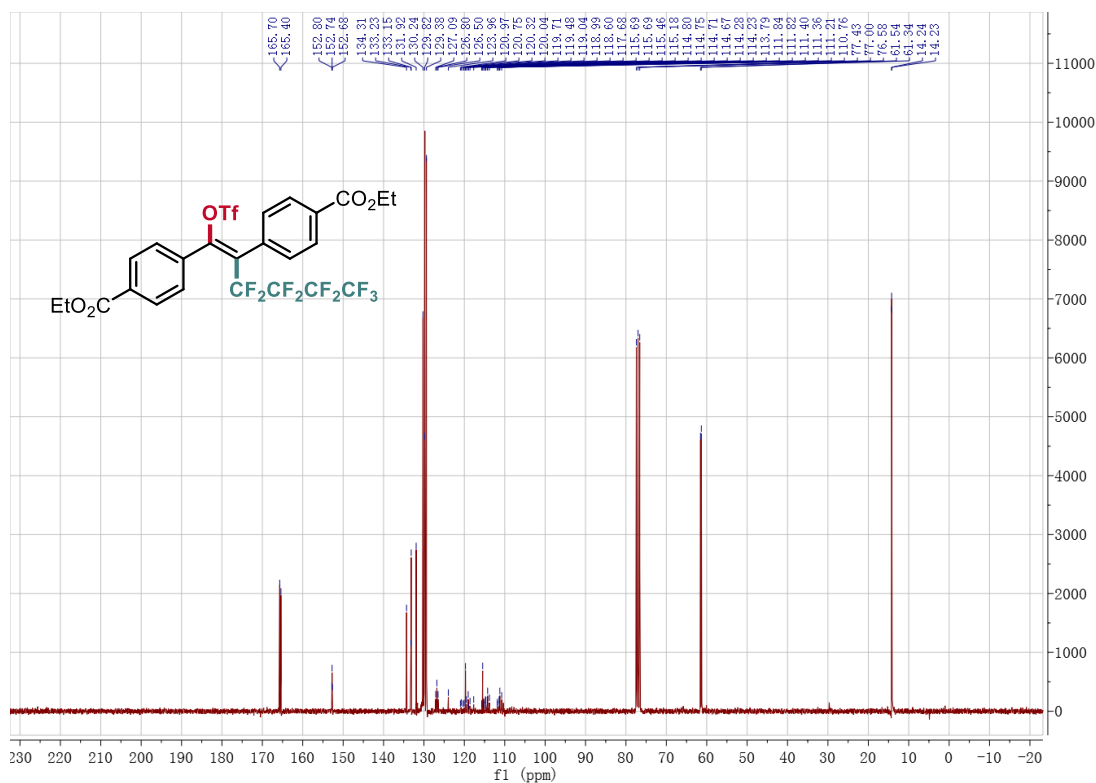

**<sup>19</sup>F NMR Spectrum of Diethyl 4,4'-(3,3,4,4,5,5,6,6,6-nonafluoro-1-(((trifluoromethyl)sulfonyl)oxy)hex-1-ene-1,2-diyl)(*E*)-dibenzoate 3z**

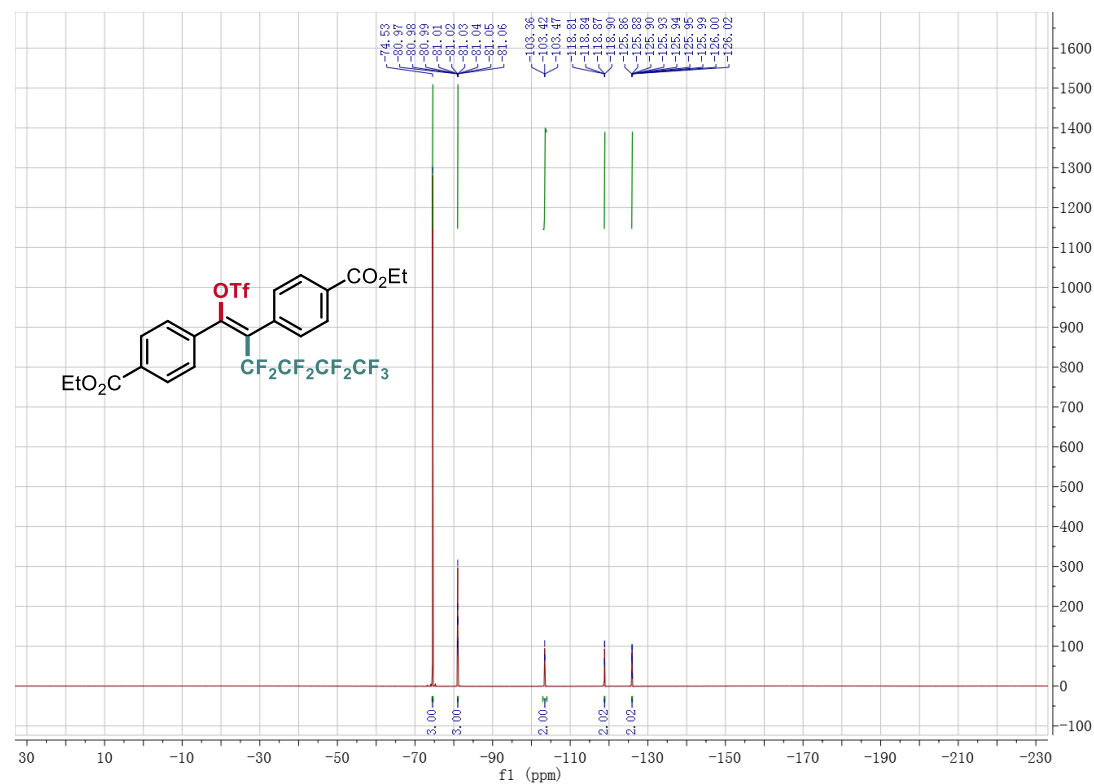

**$^{19}\text{F}$  NMR Spectrum of (*E*)-3,3,4,4,5,5,5-heptafluoro-1-phenylpent-1-en-1-yl trifluoromethanesulfonate **3aa****

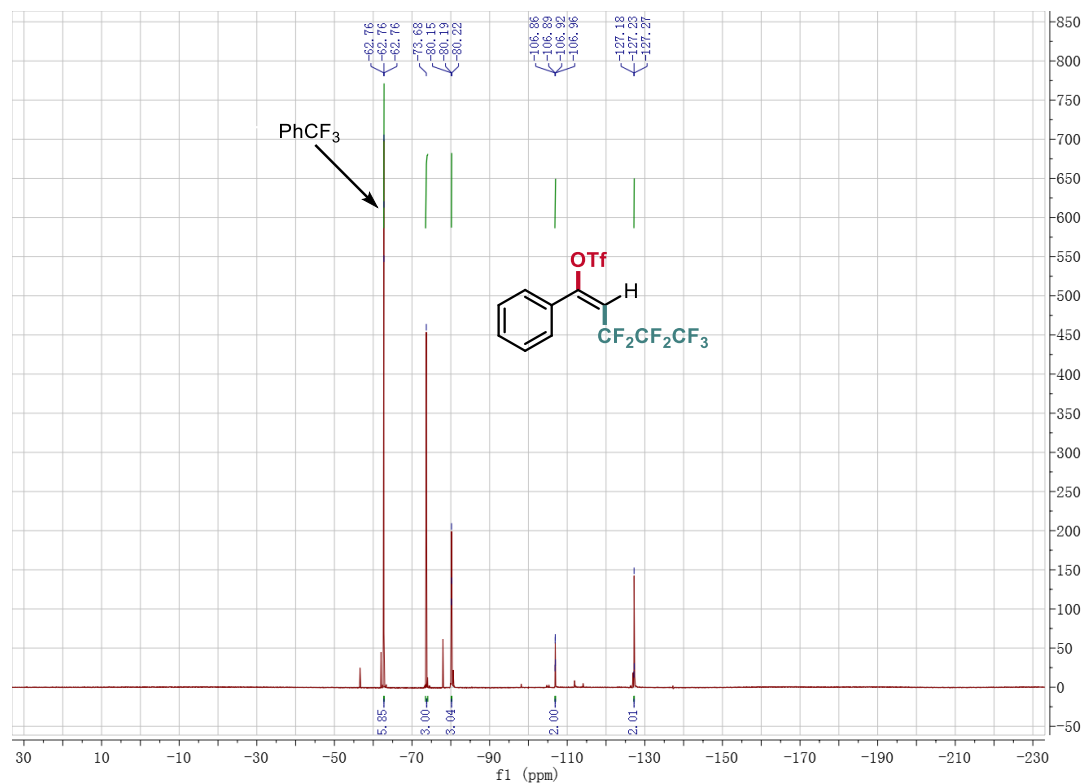

**<sup>1</sup>H NMR Spectrum of (*E*)-1-(4-(1,3-dioxisoindolin-2-yl)phenyl)-3,3,4,4,5,5,5-heptafluoropent-1-en-1-yl trifluoromethanesulfonate 3ab**

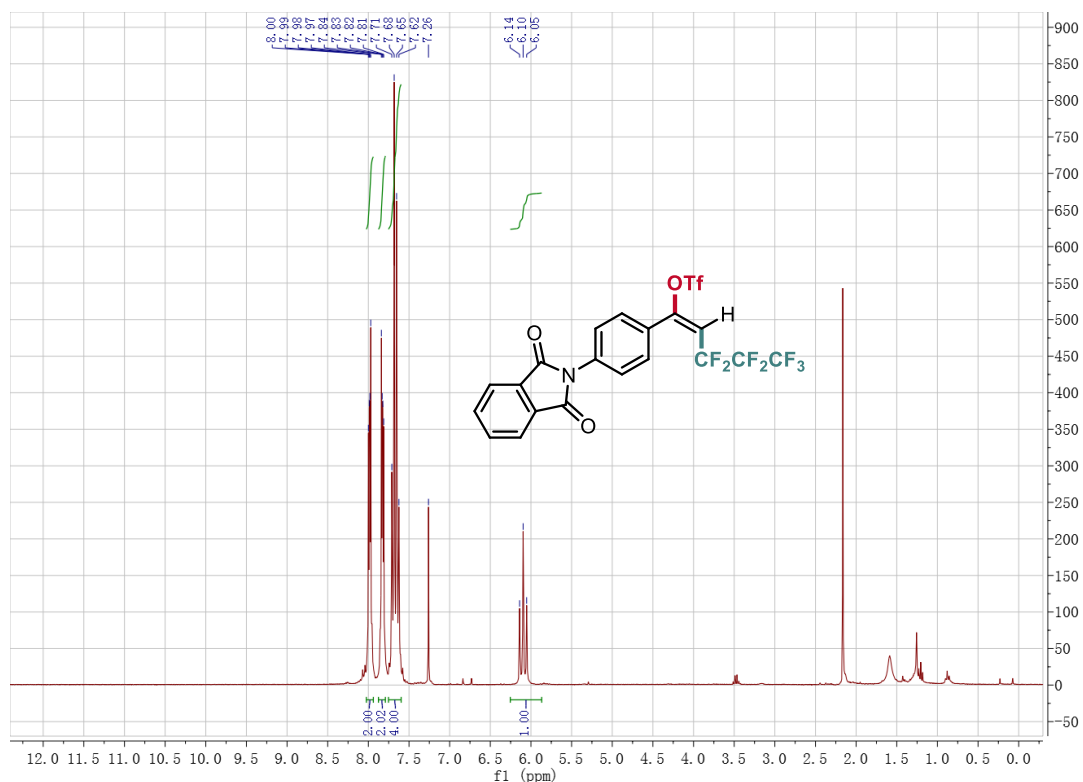

**<sup>13</sup>C NMR Spectrum of (*E*)-1-(4-(1,3-dioxisoindolin-2-yl)phenyl)-3,3,4,4,5,5,5-heptafluoropent-1-en-1-yl trifluoromethanesulfonate 3ab**

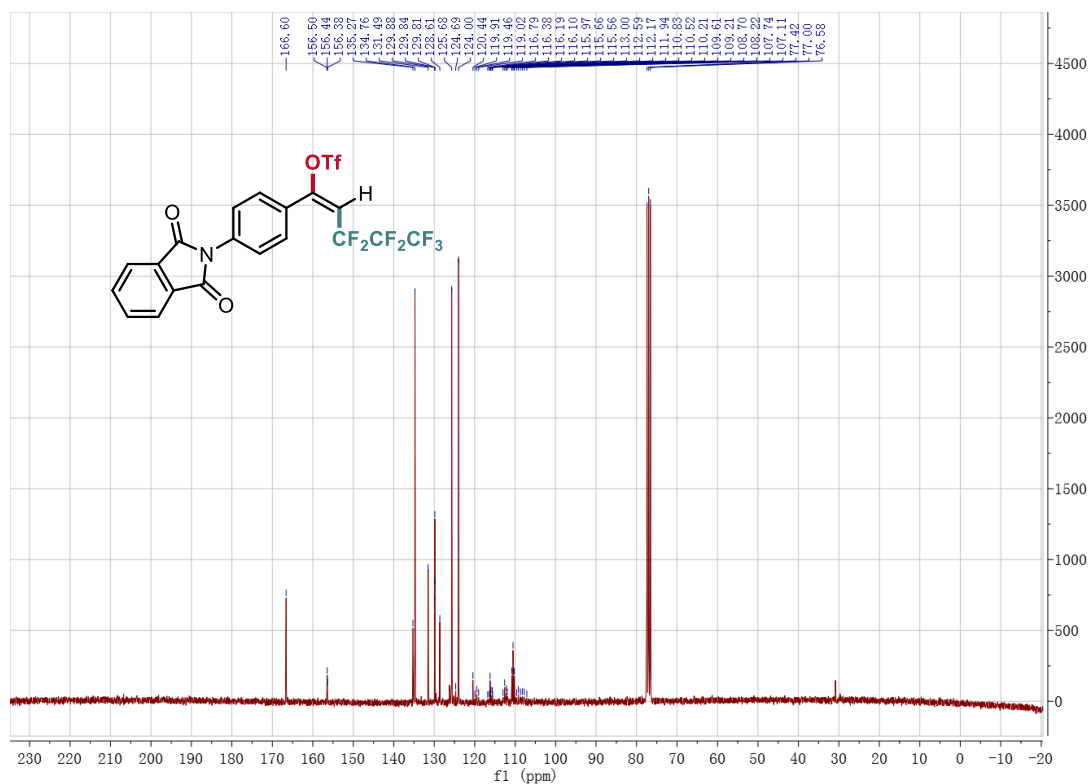

**$^{19}\text{F}$  NMR Spectrum of (*E*)-1-(4-(1,3-dioxisoindolin-2-yl)phenyl)-3,3,4,4,5,5,5-heptafluoropent-1-en-1-yl trifluoromethanesulfonate 3ab**

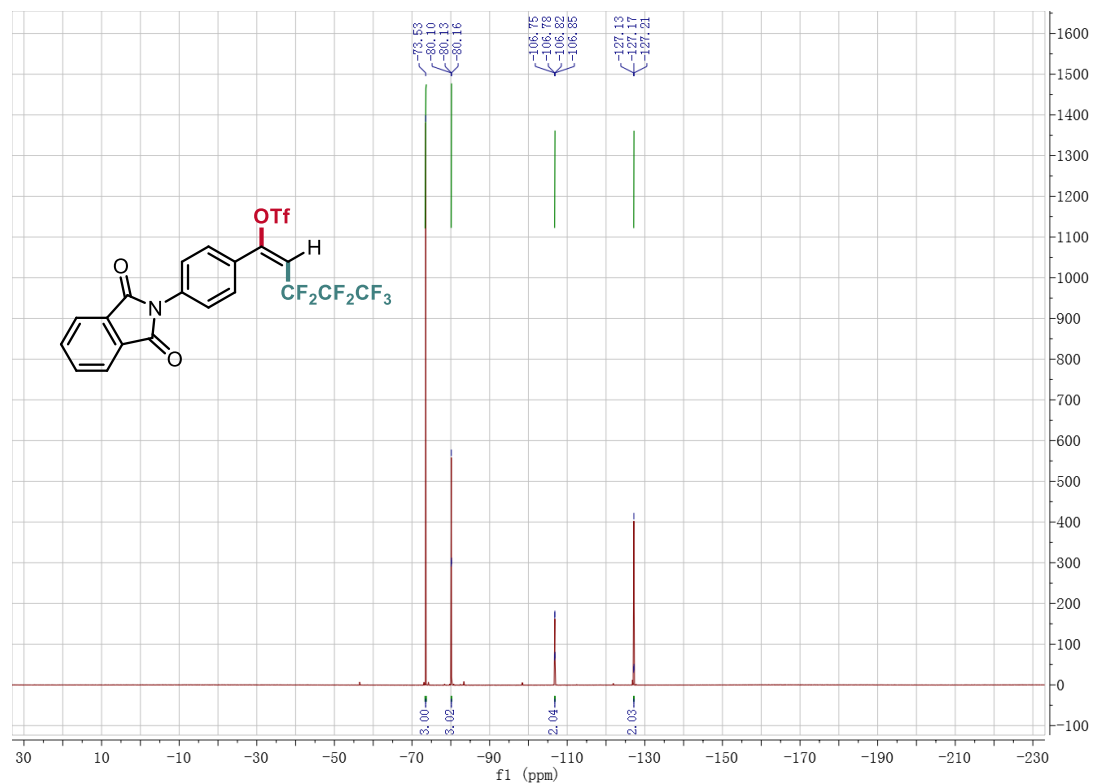

**<sup>1</sup>H NMR Spectrum of (*E*)-4-(3,3,4,4,5,5,5-heptafluoro-1-(((trifluoromethyl)sulfonyl)oxy)pent-1-en-1-yl)phenyl 4-methylbenzenesulfonate 3ac**

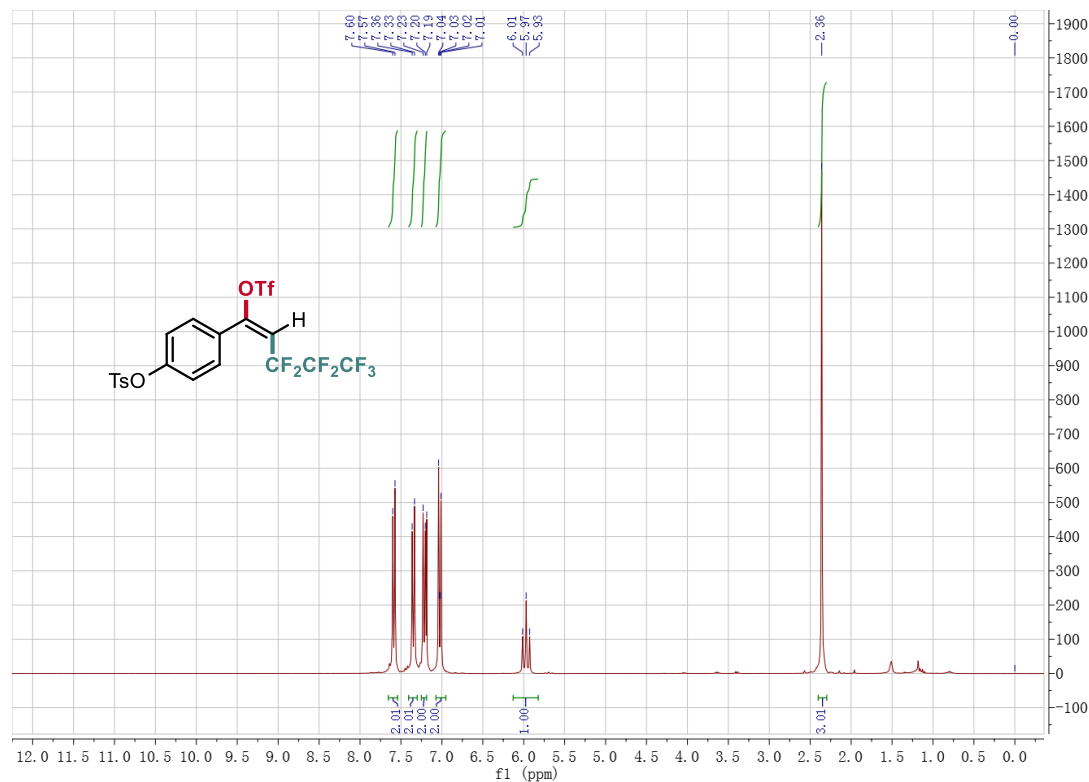

**<sup>13</sup>C NMR Spectrum of (*E*)-4-(3,3,4,4,5,5,5-heptafluoro-1-(((trifluoromethyl)sulfonyl)oxy)pent-1-en-1-yl)phenyl 4-methylbenzenesulfonate 3ac**

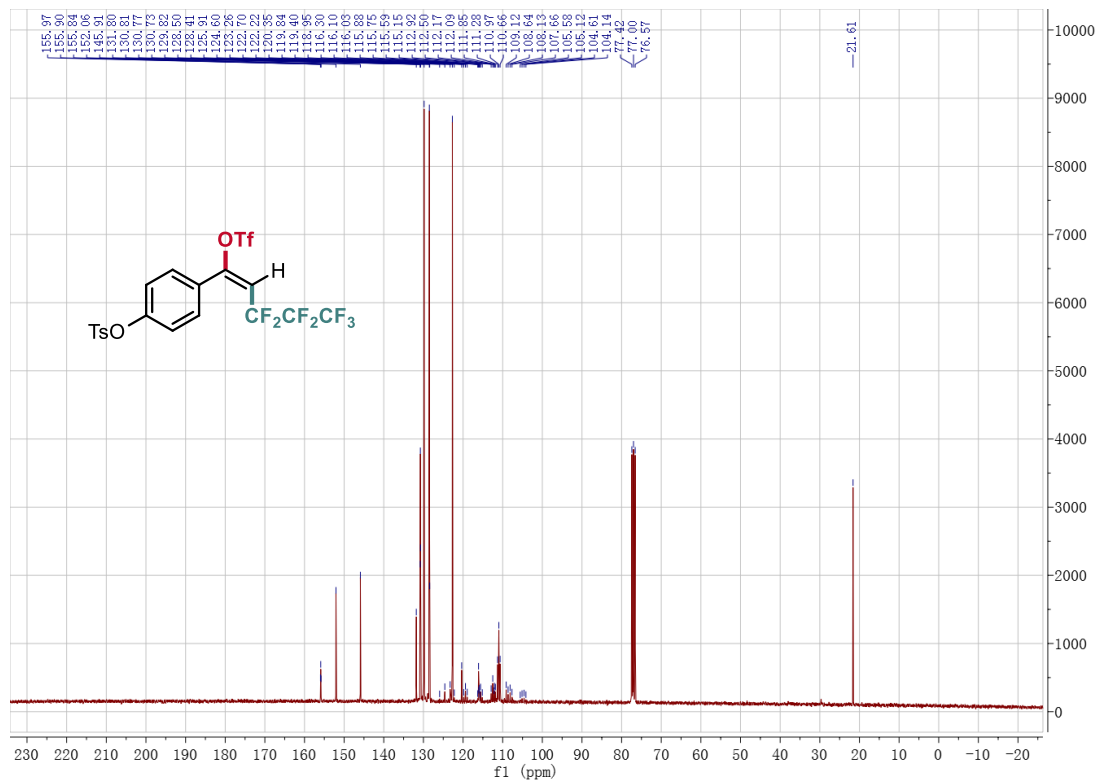

**$^{19}\text{F}$  NMR Spectrum of (*E*)-4-(3,3,4,4,5,5,5-heptafluoro-1-(((trifluoromethyl)sulfonyl)oxy)pent-1-en-1-yl)phenyl 4-methylbenzenesulfonate 3ac**

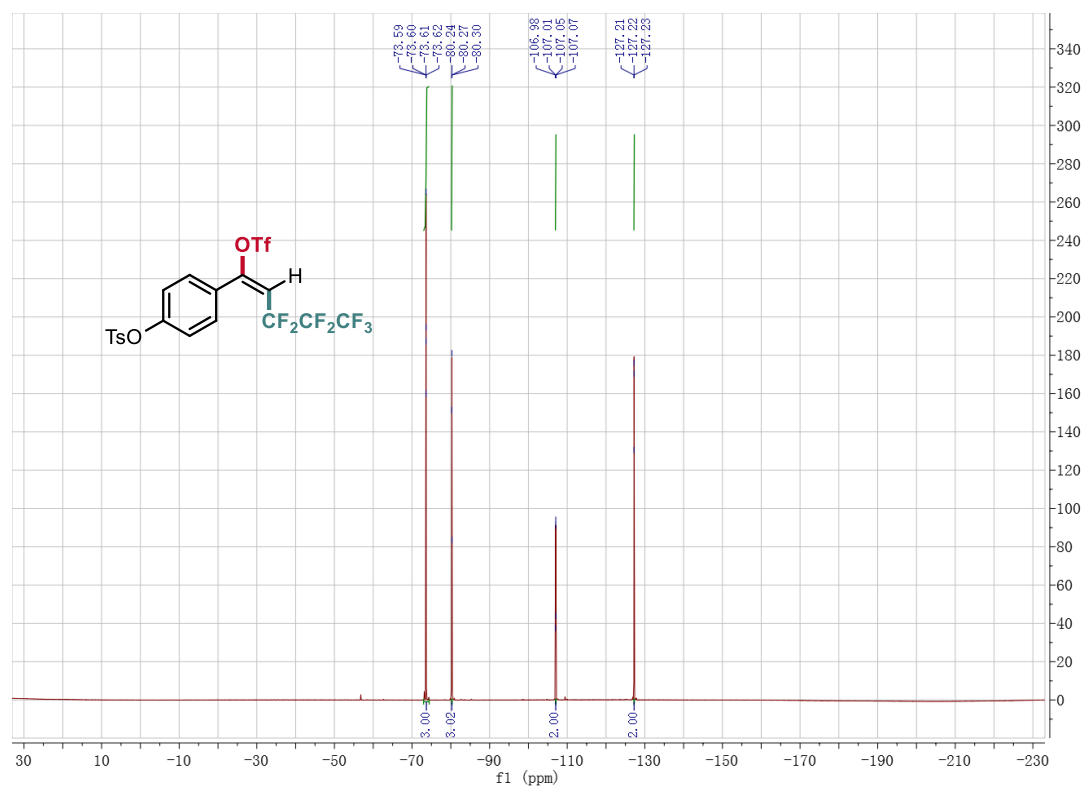

**<sup>1</sup>H NMR Spectrum of (*E*)-1-(4-bromophenyl)-3,3,4,4,5,5,5-heptafluoropent-1-en-1-yl trifluoromethanesulfonate 3ad**

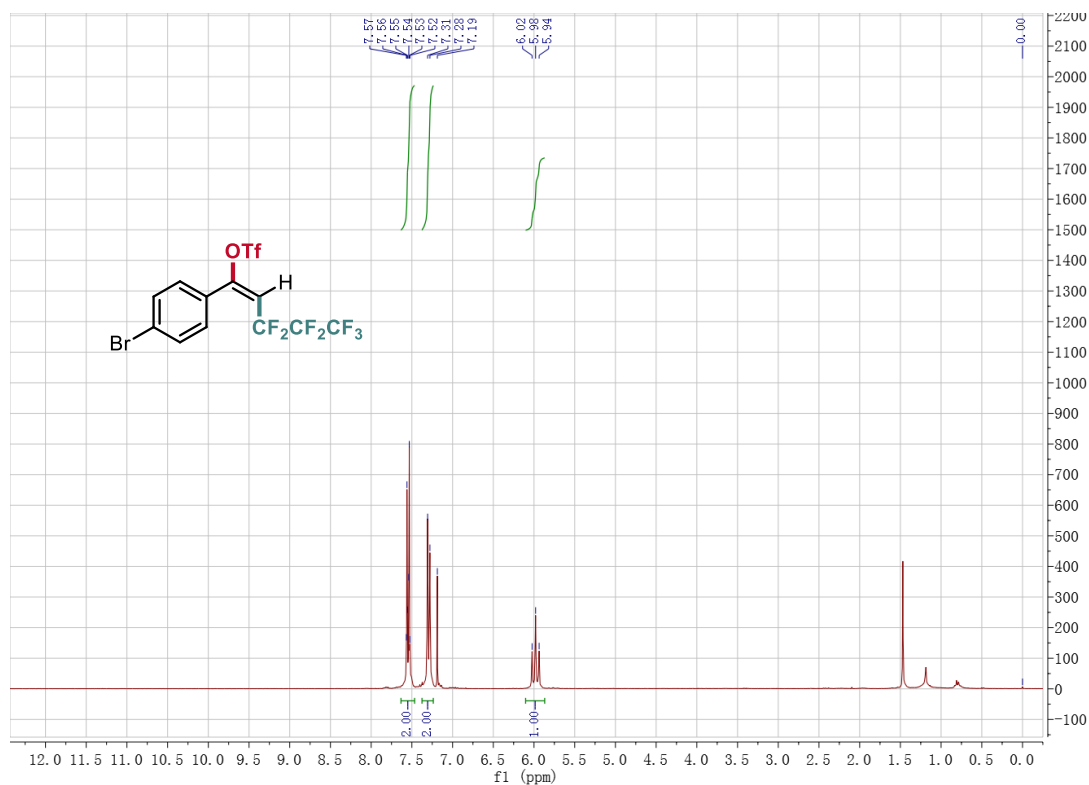

**<sup>13</sup>C NMR Spectrum of (*E*)-1-(4-bromophenyl)-3,3,4,4,5,5,5-heptafluoropent-1-en-1-yl trifluoromethanesulfonate 3ad**

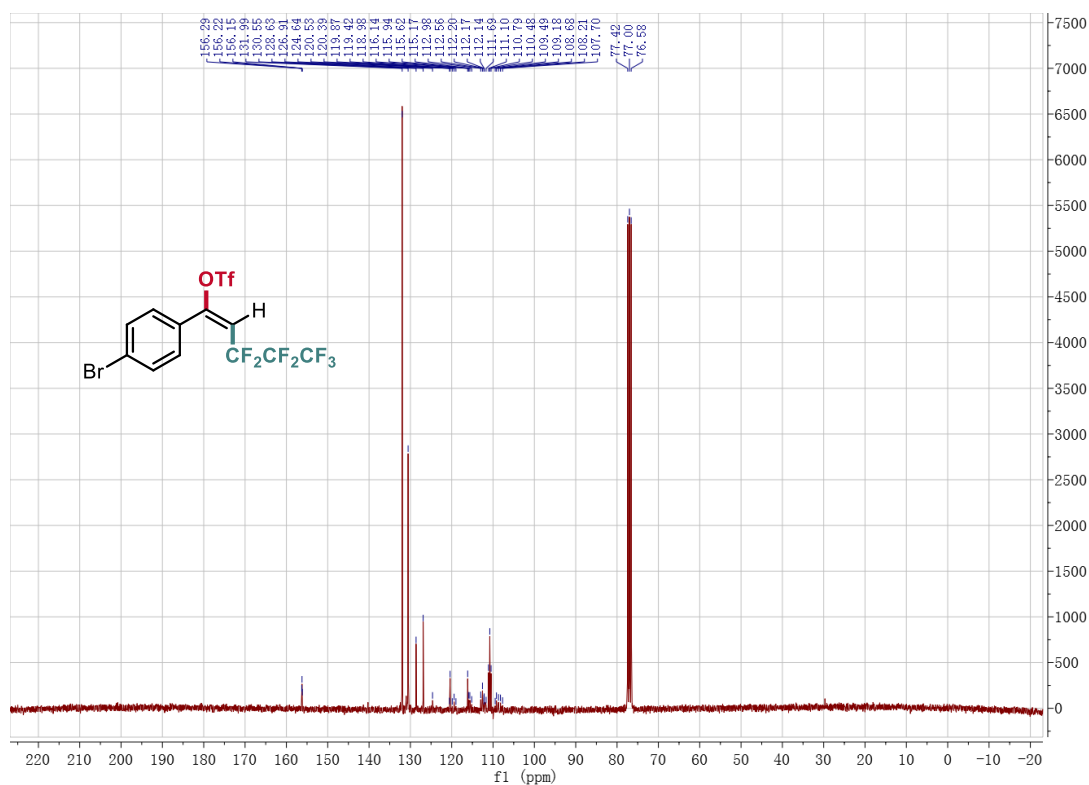

**$^{19}\text{F}$  NMR Spectrum of (*E*)-1-(4-bromophenyl)-3,3,4,4,5,5,5-heptafluoropent-1-en-1-yl trifluoromethanesulfonate 3ad**

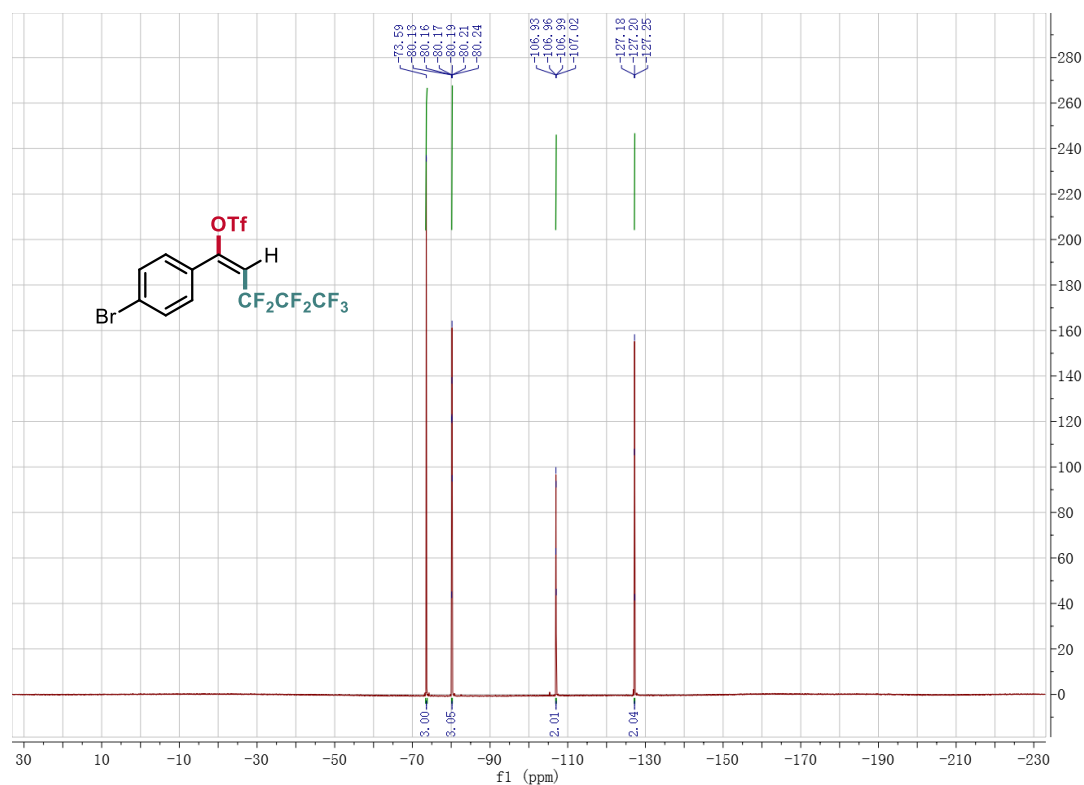

**<sup>1</sup>H NMR Spectrum of (*E*)-3,3,4,4,5,5,5-heptafluoro-1-(4-iodophenyl)pent-1-en-1-yl trifluoromethanesulfonate 3ae**

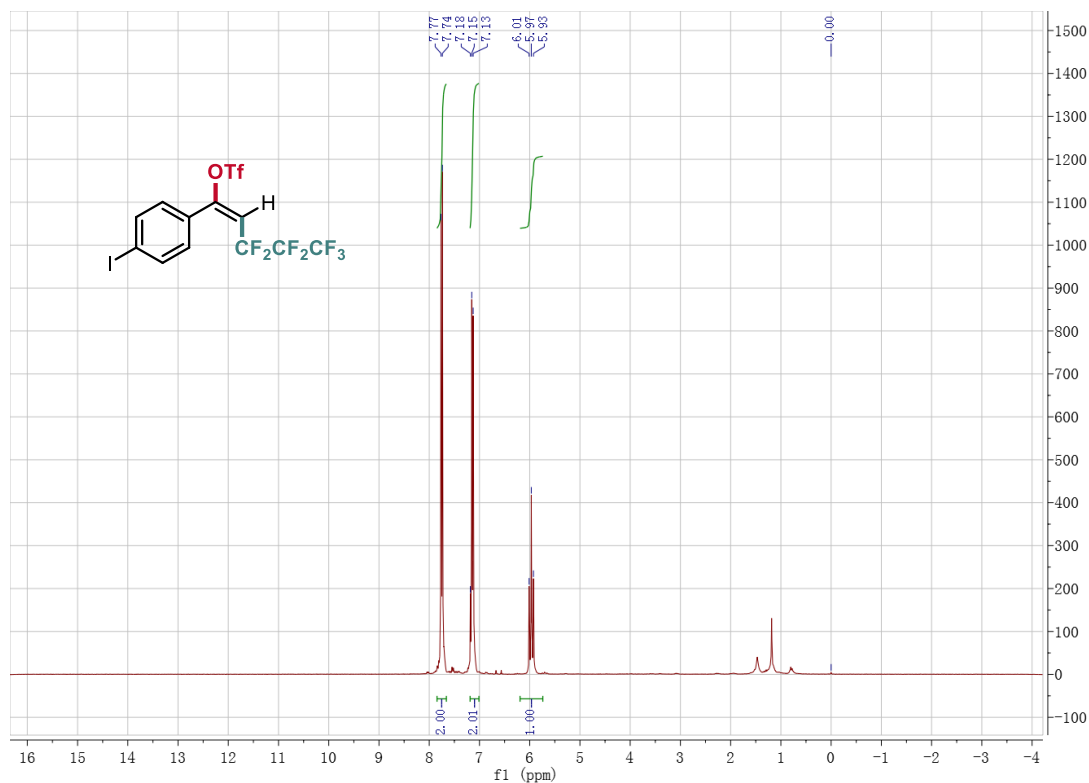

**<sup>13</sup>C NMR Spectrum of (*E*)-3,3,4,4,5,5,5-heptafluoro-1-(4-iodophenyl)pent-1-en-1-yl trifluoromethanesulfonate 3ae**

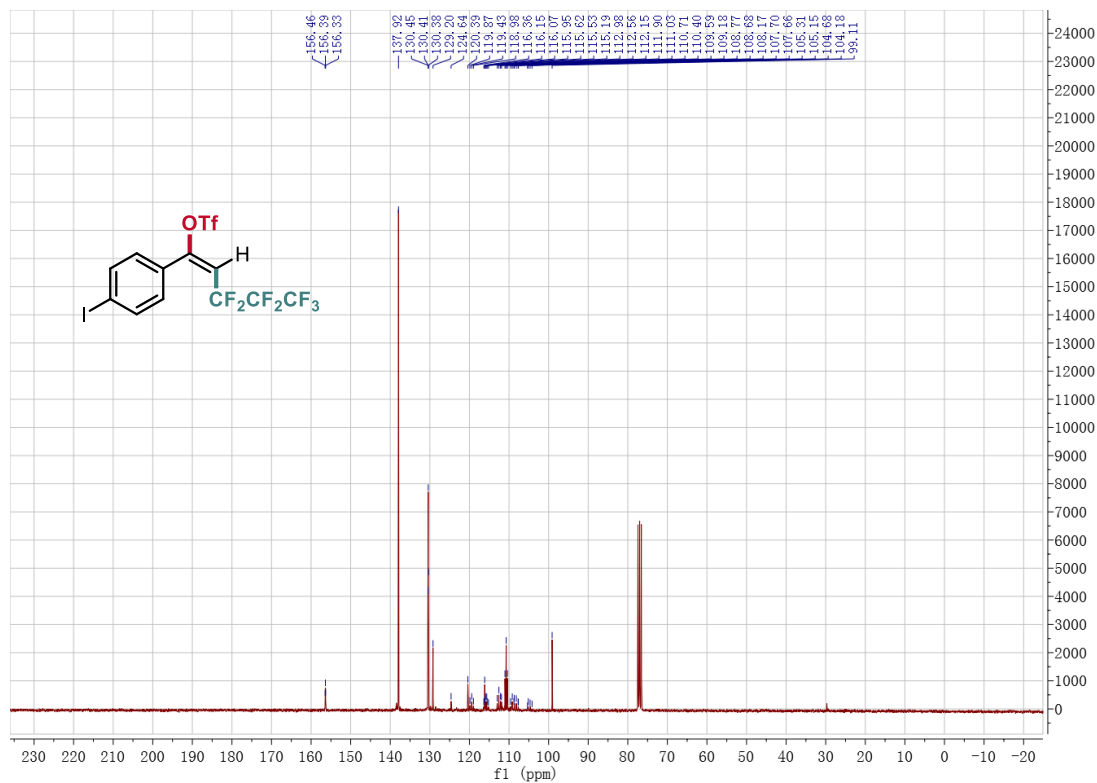

**$^{19}\text{F}$  NMR Spectrum of (*E*)-3,3,4,4,5,5,5-heptafluoro-1-(4-iodophenyl)pent-1-en-1-yl trifluoromethanesulfonate **3ae****

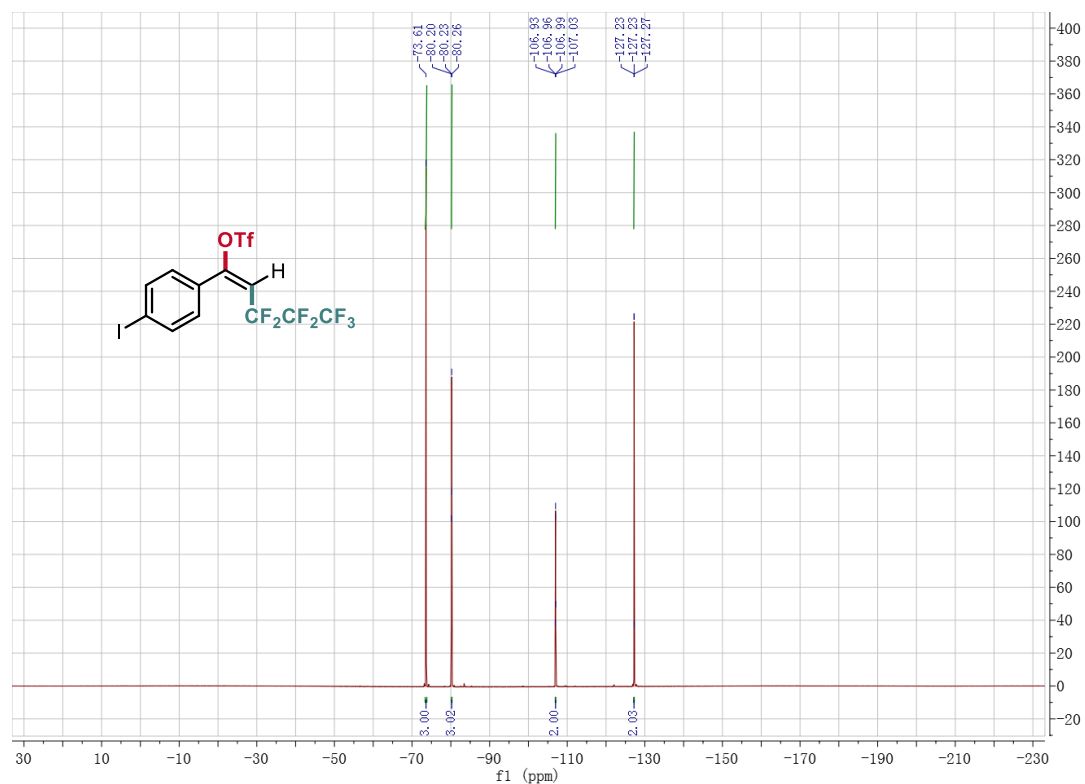

**<sup>1</sup>H NMR Spectrum of Ethyl (*E*)-4-(3,3,4,4,5,5,5-heptafluoro-1-(((trifluoromethyl)sulfonyl)oxy)pent-1-en-1-yl)benzoate 3af**

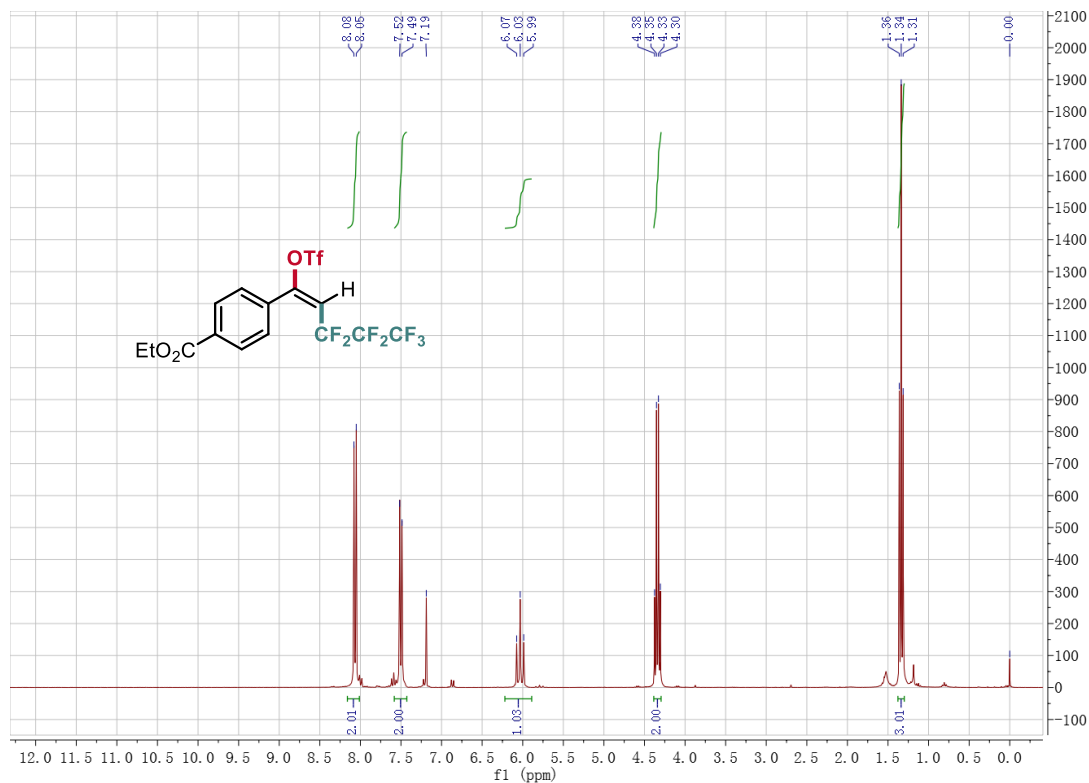

**<sup>13</sup>C NMR Spectrum of Ethyl (*E*)-4-(3,3,4,4,5,5,5-heptafluoro-1-(((trifluoromethyl)sulfonyl)oxy)pent-1-en-1-yl)benzoate 3af**

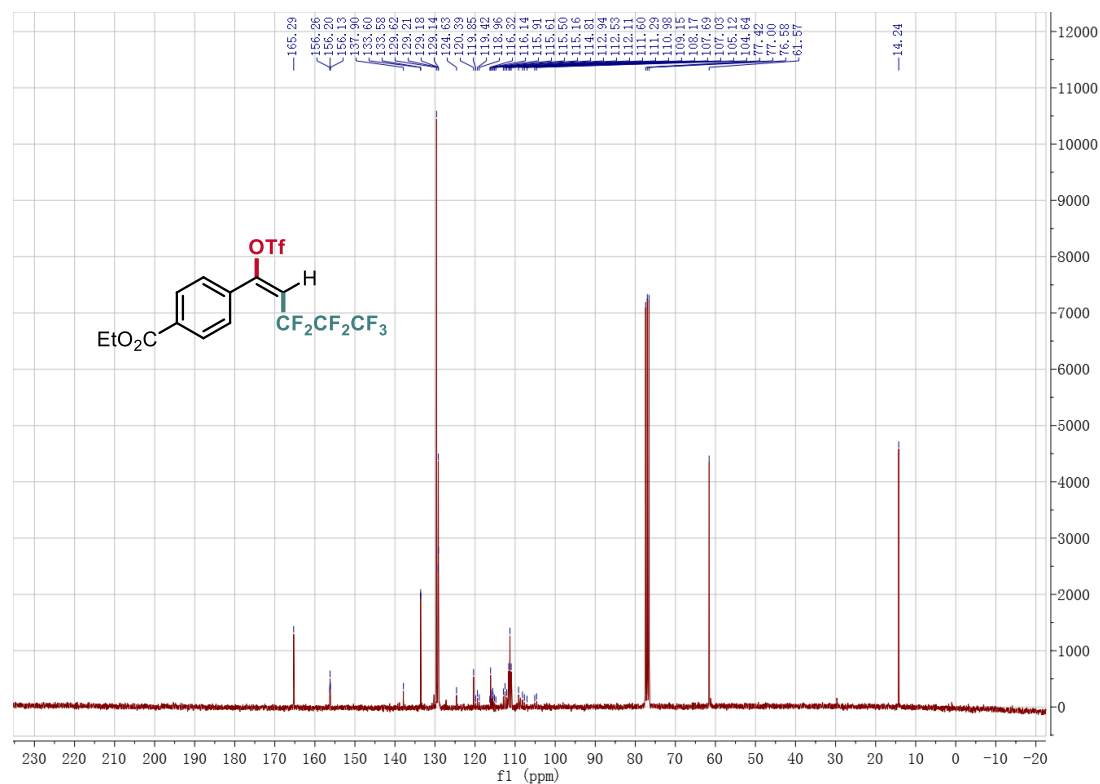

**$^{19}\text{F}$  NMR Spectrum of Ethyl (*E*)-4-(3,3,4,4,5,5,5-heptafluoro-1-(((trifluoromethyl)sulfonyl)oxy)pent-1-en-1-yl)benzoate 3af**

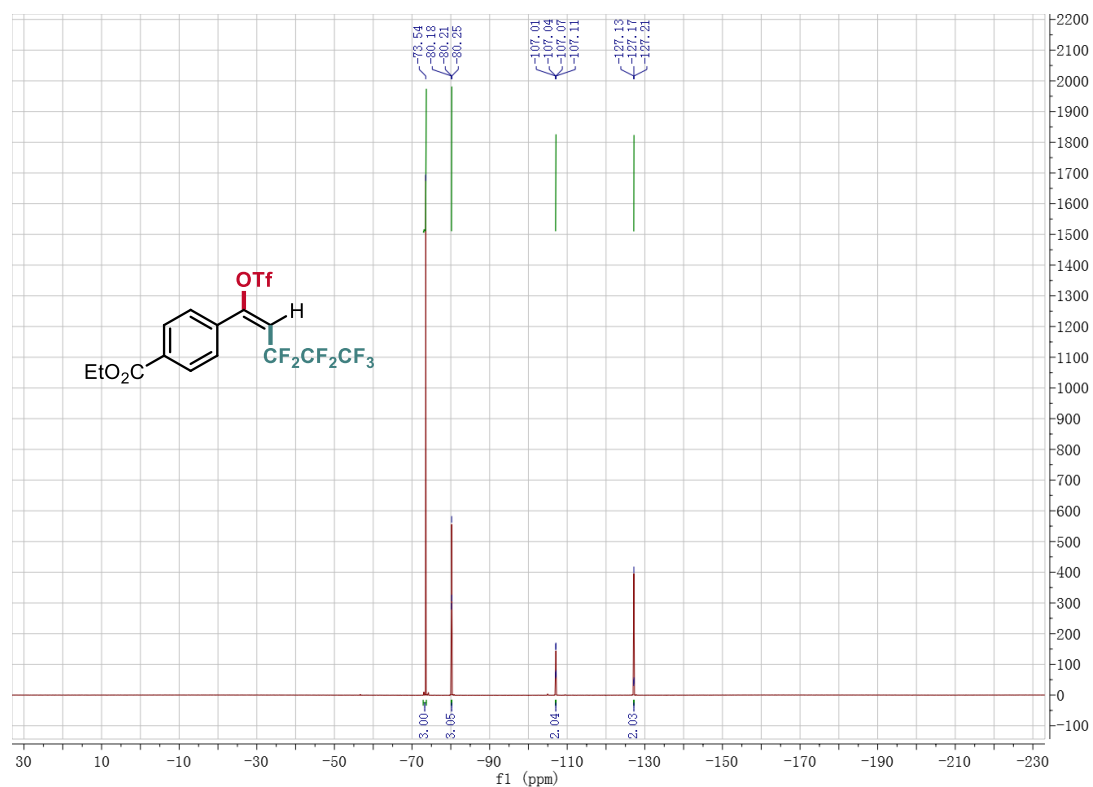

N#Cc1ccc(cc1)/C=C/C(F)(F)FC(=O)OC(F)(F)F

Chemical structure: (E)-4-(4-cyanophenyl)-2-(trifluoromethyl)but-2-enoate

<sup>1</sup>H NMR spectrum (CDCl<sub>3</sub>) showing peaks at 7.72, 7.58, 7.55, 7.19, 6.13, 6.08, 6.04, 3.36, 1.44, 1.36, and 0.00 ppm. Integration values are 2.00, 2.00, 1.00, and 0.00.

Chemical structure: N#Cc1ccc(cc1)/C(=O)C(=C/C(F)(F)F)C(F)(F)F

<sup>13</sup>C NMR peak list (ppm):

- 154.95
- 154.88
- 154.81
- 154.73
- 154.65
- 154.58
- 154.50
- 154.42
- 154.34
- 154.26
- 154.18
- 154.10
- 154.02
- 153.94
- 153.86
- 153.78
- 153.70
- 153.62
- 153.54
- 153.46
- 153.38
- 153.30
- 153.22
- 153.14
- 153.06
- 152.98
- 152.90
- 152.82
- 152.74
- 152.66
- 152.58
- 152.50
- 152.42
- 152.34
- 152.26
- 152.18
- 152.10
- 152.02
- 151.94
- 151.86
- 151.78
- 151.70
- 151.62
- 151.54
- 151.46
- 151.38
- 151.30
- 151.22
- 151.14
- 151.06
- 150.98
- 150.90
- 150.82
- 150.74
- 150.66
- 150.58
- 150.50
- 150.42
- 150.34
- 150.26
- 150.18
- 150.10
- 150.02
- 149.94
- 149.86
- 149.78
- 149.70
- 149.62
- 149.54
- 149.46
- 149.38
- 149.30
- 149.22
- 149.14
- 149.06
- 148.98
- 148.90
- 148.82
- 148.74
- 148.66
- 148.58
- 148.50
- 148.42
- 148.34
- 148.26
- 148.18
- 148.10
- 148.02
- 147.94
- 147.86
- 147.78
- 147.70
- 147.62
- 147.54
- 147.46
- 147.38
- 147.30
- 147.22
- 147.14
- 147.06
- 146.98
- 146.90
- 146.82
- 146.74
- 146.66
- 146.58
- 146.50
- 146.42
- 146.34
- 146.26
- 146.18
- 146.10
- 146.02
- 145.94
- 145.86
- 145.78
- 145.70
- 145.62
- 145.54
- 145.46
- 145.38
- 145.30
- 145.22
- 145.14
- 145.06
- 144.98
- 144.90
- 144.82
- 144.74
- 144.66
- 144.58
- 144.50
- 144.42
- 144.34
- 144.26
- 144.18
- 144.10
- 144.02
- 143.94
- 143.86
- 143.78
- 143.70
- 143.62
- 143.54
- 143.46
- 143.38
- 143.30
- 143.22
- 143.14
- 143.06
- 142.98
- 142.90
- 142.82
- 142.74
- 142.66
- 142.58
- 142.50
- 142.42
- 142.34
- 142.26
- 142.18
- 142.10
- 142.02
- 141.94
- 141.86
- 141.78
- 141.70
- 141.62
- 141.54
- 141.46
- 141.38
- 141.30
- 141.22
- 141.14
- 141.06
- 140.98
- 140.90
- 140.82
- 140.74
- 140.66
- 140.58
- 140.50
- 140.42
- 140.34
- 140.26
- 140.18
- 140.10
- 140.02
- 139.94
- 139.86
- 139.78
- 139.70
- 139.62
- 139.54
- 139.46
- 139.38
- 139.30
- 139.22
- 139.14
- 139.06
- 138.98
- 138.90
- 138.82
- 138.74
- 138.66
- 138.58
- 138.50
- 138.42
- 138.34
- 138.26
- 138.18
- 138.10
- 138.02
- 137.94
- 137.86
- 137.78
- 137.70
- 137.62
- 137.54
- 137.46
- 137.38
- 137.30
- 137.22
- 137.14
- 137.06
- 136.98
- 136.90
- 136.82
- 136.74
- 136.66
- 136.58
- 136.50
- 136.42
- 136.34
- 136.26
- 136.18
- 136.10
- 136.02
- 135.94
- 135.86
- 135.78
- 135.70
- 135.62
- 135.54
- 135.46
- 135.38
- 135.30
- 135.22
- 135.14
- 135.06
- 134.98
- 134.90
- 134.82
- 134.74
- 134.66
- 134.58
- 134.50
- 134.42
- 134.34
- 134.26
- 134.18
- 134.10
- 134.02
- 133.94
- 133.86
- 133.78
- 133.70
- 133.62
- 133.54
- 133.46
- 133.38
- 133.30
- 133.22
- 133.14
- 133.06
- 132.98
- 132.90
- 132.82
- 132.74
- 132.66
- 132.58
- 132.50
- 132.42
- 132.34
- 132.26
- 132.18
- 132.10
- 132.02
- 131.94
- 131.86
- 131.78
- 131.70
- 131.62
- 131.54
- 131.46
- 131.38
- 131.30
- 131.22
- 131.14
- 131.06
- 130.98
- 130.90
- 130.82
- 130.74
- 130.66
- 130.58
- 130.50
- 130.42
- 130.34
- 130.26
- 130.18
- 130.10
- 130.02
- 129.94
- 129.86
- 129.78
- 129.70
- 129.62
- 129

**$^{19}\text{F}$  NMR Spectrum of (*E*)-1-(4-cyanophenyl)-3,3,4,4,5,5,5-heptafluoropent-1-en-1-yl trifluoromethanesulfonate **3a****

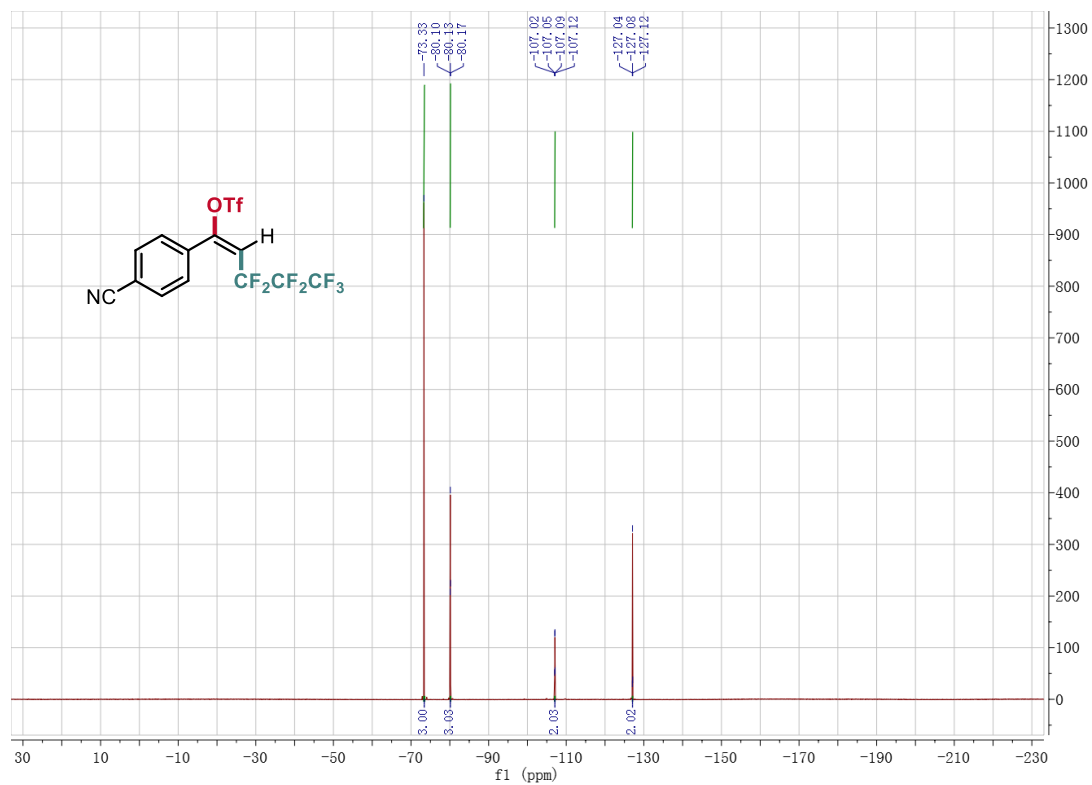

## Spectral data of follow-up chemistry products 4, 5, 6, 7

### <sup>1</sup>H NMR Spectrum of (*E*)-4-(3,3,4,4,5,5,5-heptafluoro-1-(4-methoxyphenyl)-2-propylpent-1-en-1-yl)benzonitrile 4

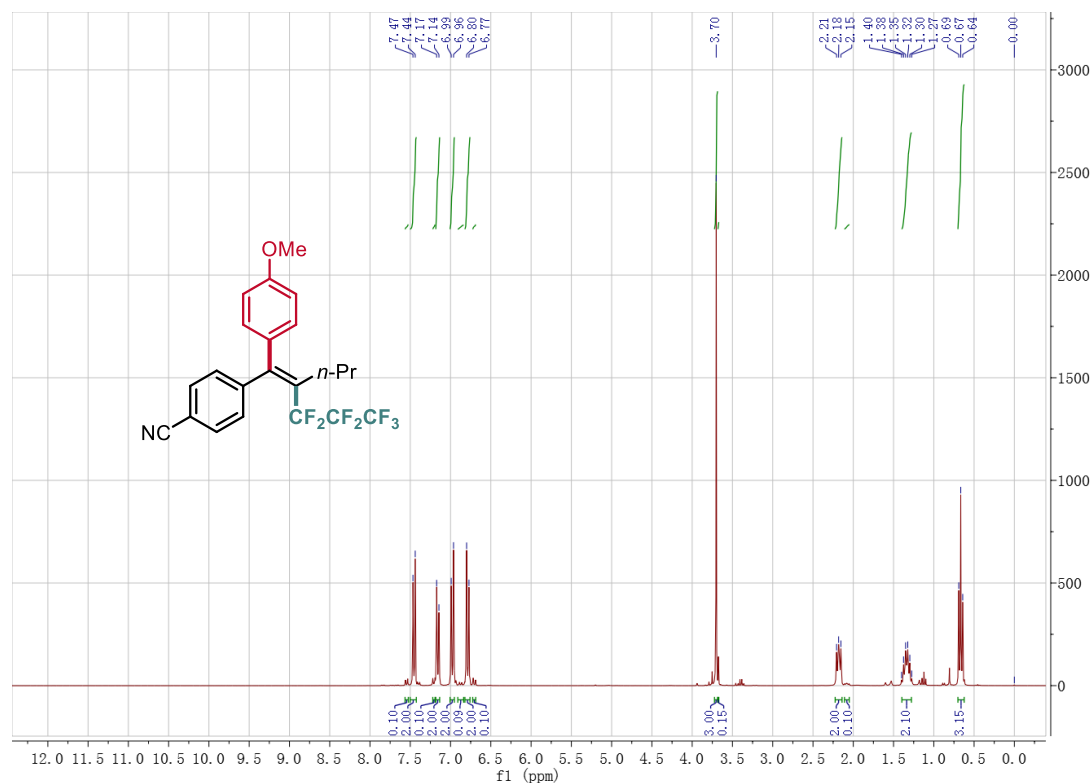

### <sup>13</sup>C NMR Spectrum of (*E*)-4-(3,3,4,4,5,5,5-heptafluoro-1-(4-methoxyphenyl)-2-propylpent-1-en-1-yl)benzonitrile 4

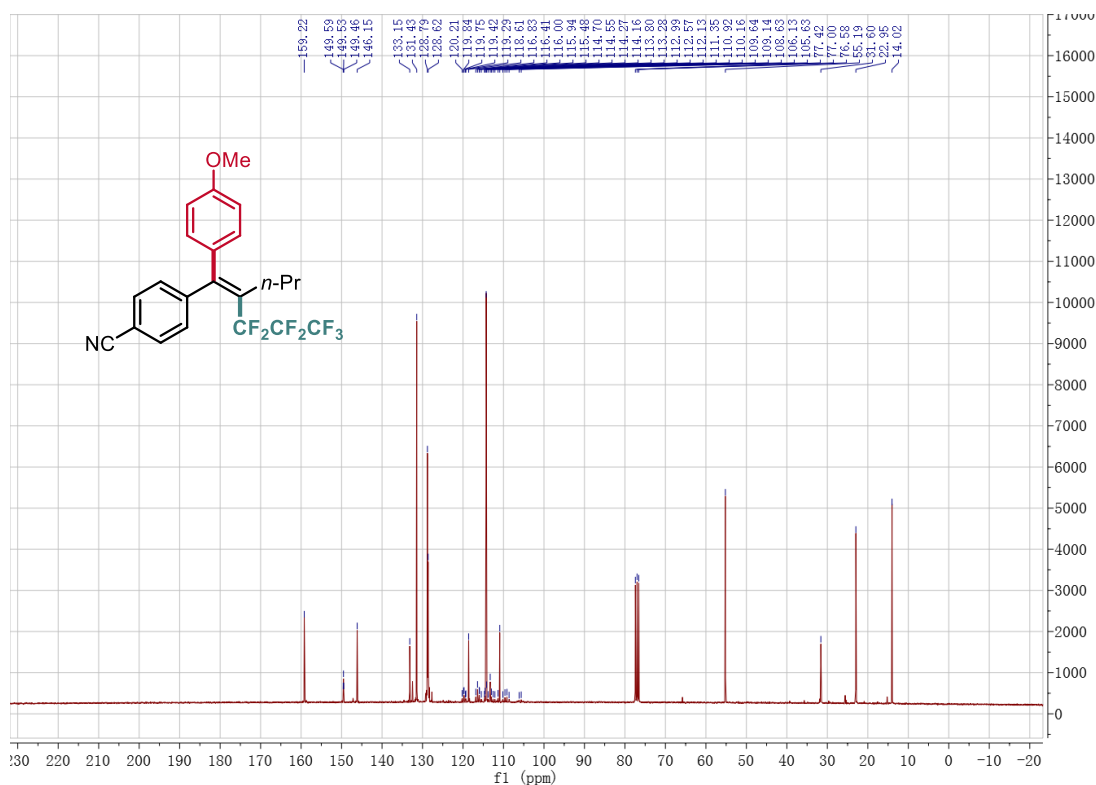

**$^{19}\text{F}$  NMR Spectrum of (*E*)-4-(3,3,4,4,5,5,5-heptafluoro-1-(4-methoxyphenyl)-2-propylpent-1-en-1-yl)benzonitrile 4**

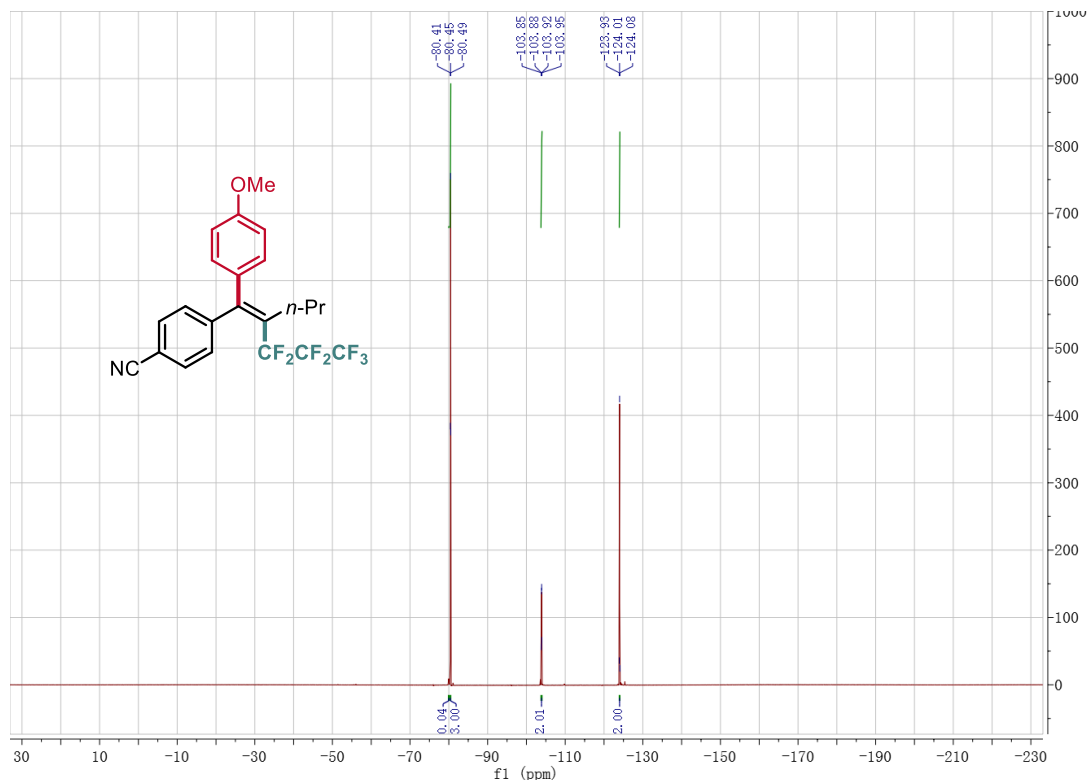

**$^{19}\text{F}$ - $^1\text{H}$  HOESY NMR Spectrum of (*E*)-4-(3,3,4,4,5,5,5-heptafluoro-1-(4-methoxyphenyl)-2-propylpent-1-en-1-yl)benzonitrile 4**

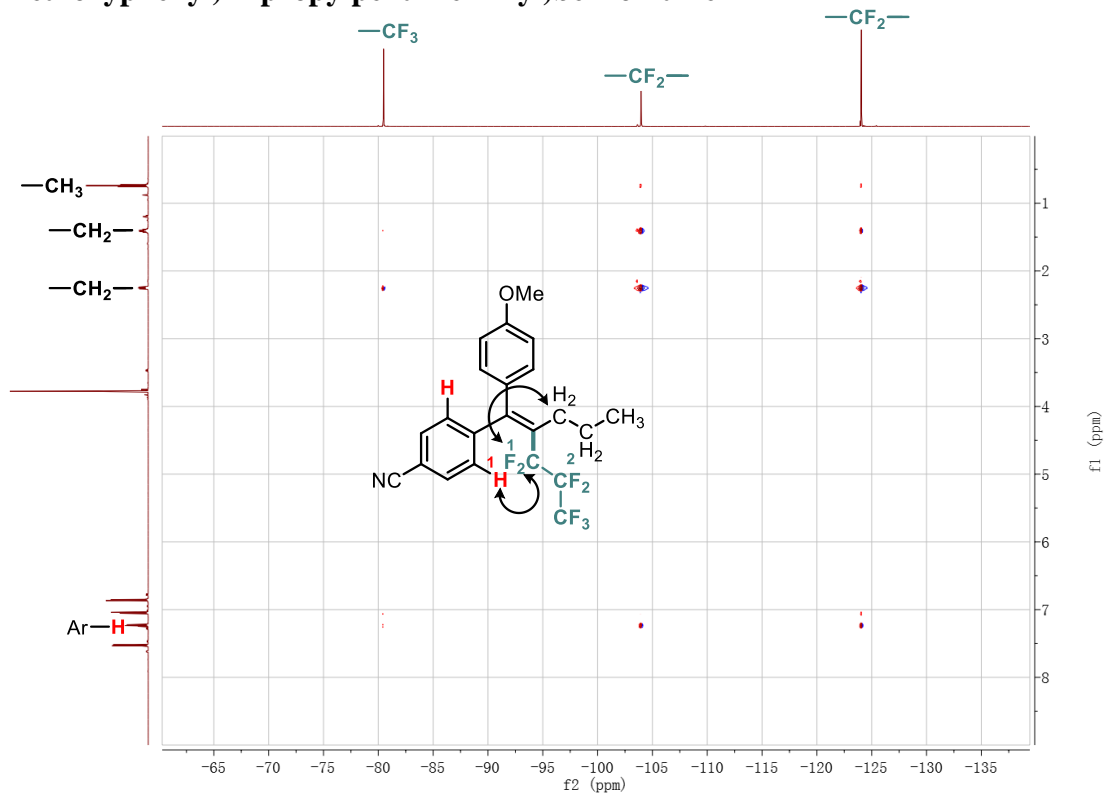

**<sup>1</sup>H NMR Spectrum of Diethyl 4,4'-((1E,3Z)-5,5,6,6,7,7,8,8,8-nonafluoro-1-phenylocta-1,3-diene-3,4-diyl)dibenzoate 5**

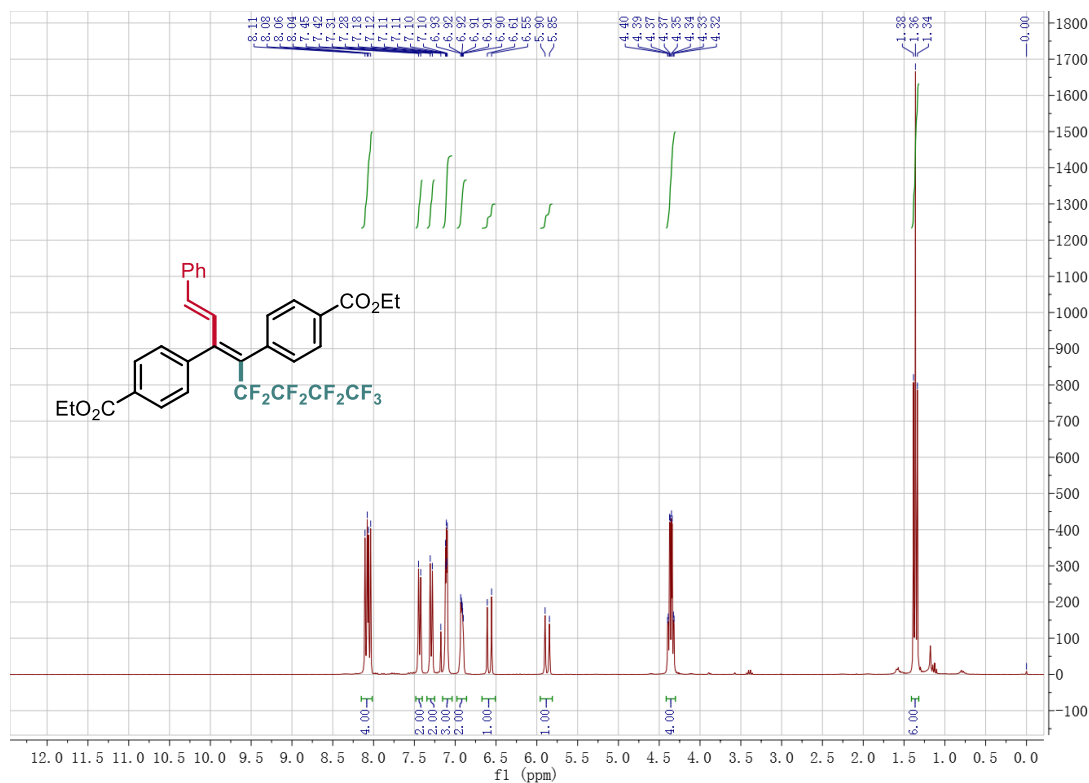

**<sup>13</sup>C NMR Spectrum of Diethyl 4,4'-((1E,3Z)-5,5,6,6,7,7,8,8,8-nonafluoro-1-phenylocta-1,3-diene-3,4-diyl)dibenzoate 5**

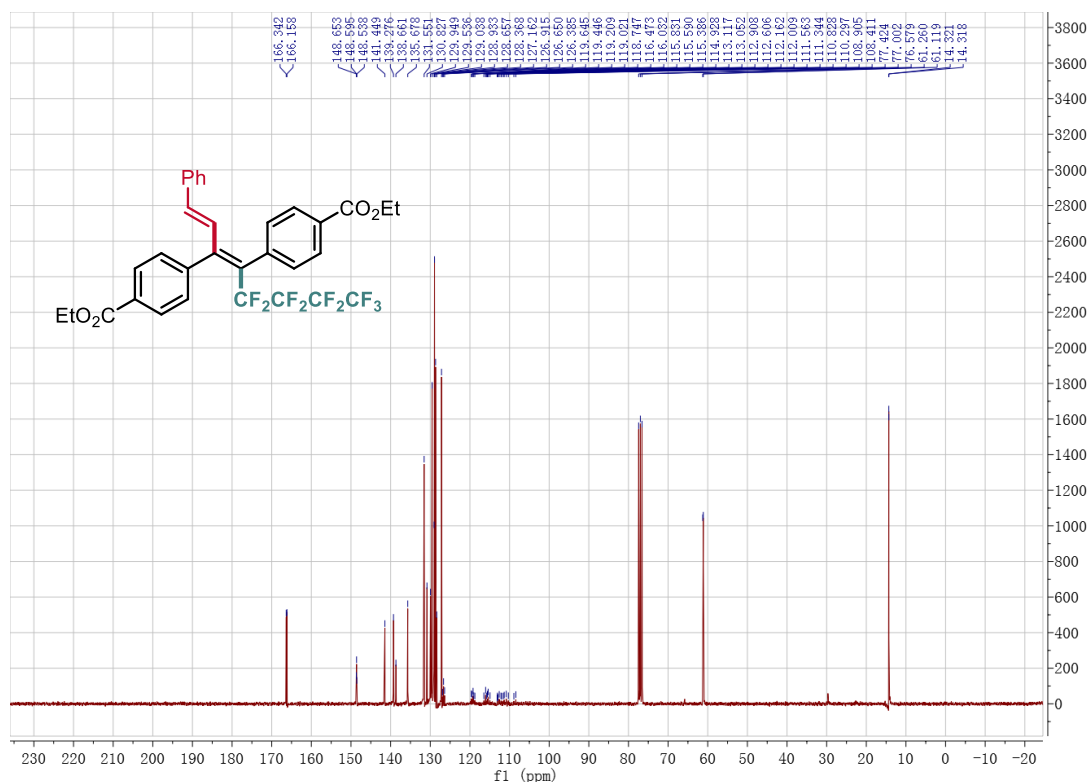

**$^{19}\text{F}$  NMR Spectrum of Diethyl 4,4'-((1*E*,3*Z*)-5,5,6,6,7,7,8,8,8-nonafluoro-1-phenylocta-1,3-diene-3,4-diyl)dibenzoate 5**

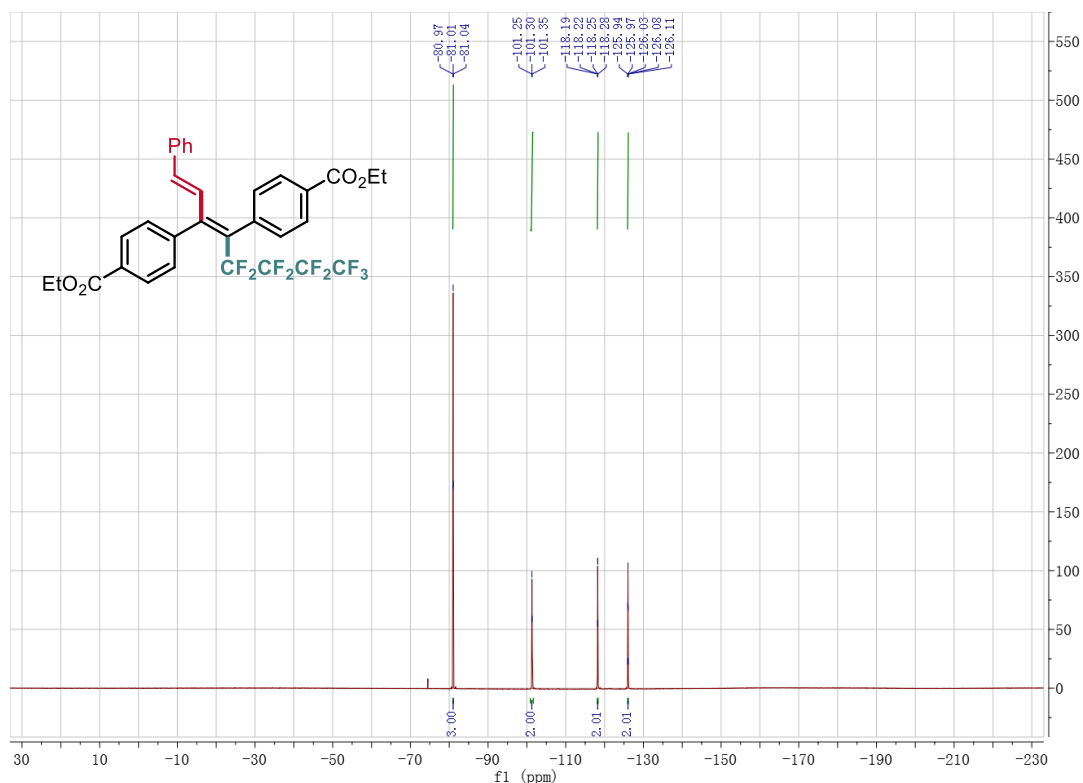

**$^{19}\text{F}$ - $^1\text{H}$  HOESY NMR Spectrum of Diethyl 4,4'-((1*E*,3*Z*)-5,5,6,6,7,7,8,8,8-nonafluoro-1-phenylocta-1,3-diene-3,4-diyl)dibenzoate 5**

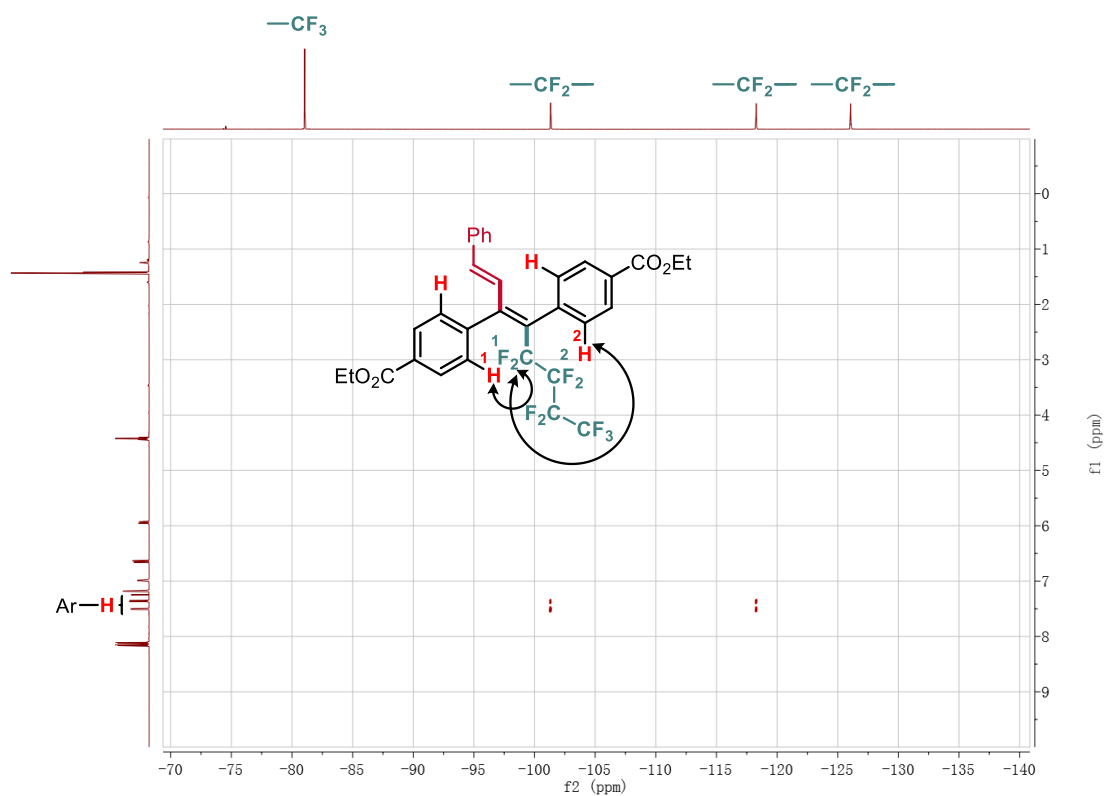

Chemical structure: CCOC(=O)c1ccc(cc1)/N=N/c2ccc(cc2)C(F)(F)F

<sup>1</sup>H NMR spectrum (CDCl<sub>3</sub>) showing peaks from 0.0 to 12.0 ppm. The spectrum includes aromatic signals, a diazo group signal, and aliphatic signals from the ethyl ester groups. Integration values are provided below the baseline.

Chemical structure: CCOC(=O)c1ccc(cc1)/C(C#CC)c2ccc(cc2)C(=O)OCC

<sup>13</sup>C NMR spectrum (CDCl<sub>3</sub>) showing peaks from 166.18 to 13.00 ppm. The spectrum is labeled with chemical shifts in ppm on the x-axis and intensity on the y-axis.

Chemical structure labels: *n*-Pr, CF<sub>2</sub>CF<sub>2</sub>CF<sub>3</sub>, EtO<sub>2</sub>C.

**$^{19}\text{F}$  NMR Spectrum of Diethyl 4,4'-(1,1,1,2,2,3,3-heptafluorodec-4-en-6-yne-4,5-diyl)(*E*)-dibenzoate 6**

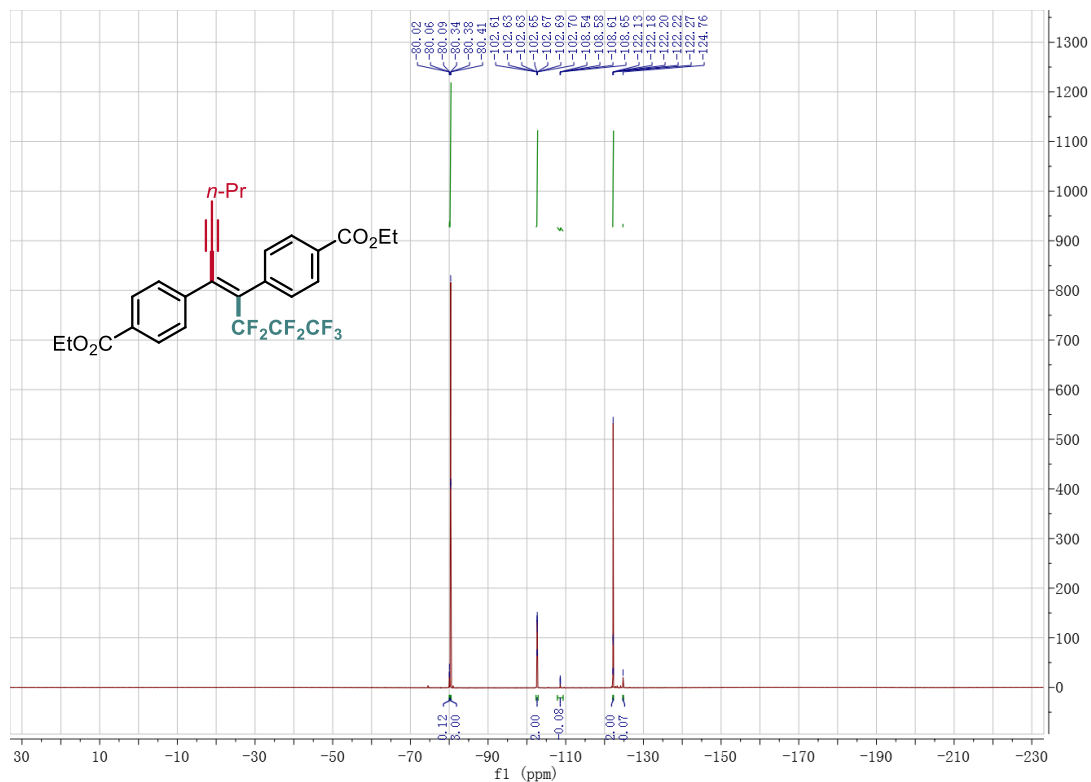

**$^{19}\text{F}$ - $^1\text{H}$  HOESY NMR Spectrum of Diethyl 4,4'-(1,1,1,2,2,3,3-heptafluorodec-4-en-6-yne-4,5-diyl)(*E*)-dibenzoate 6**

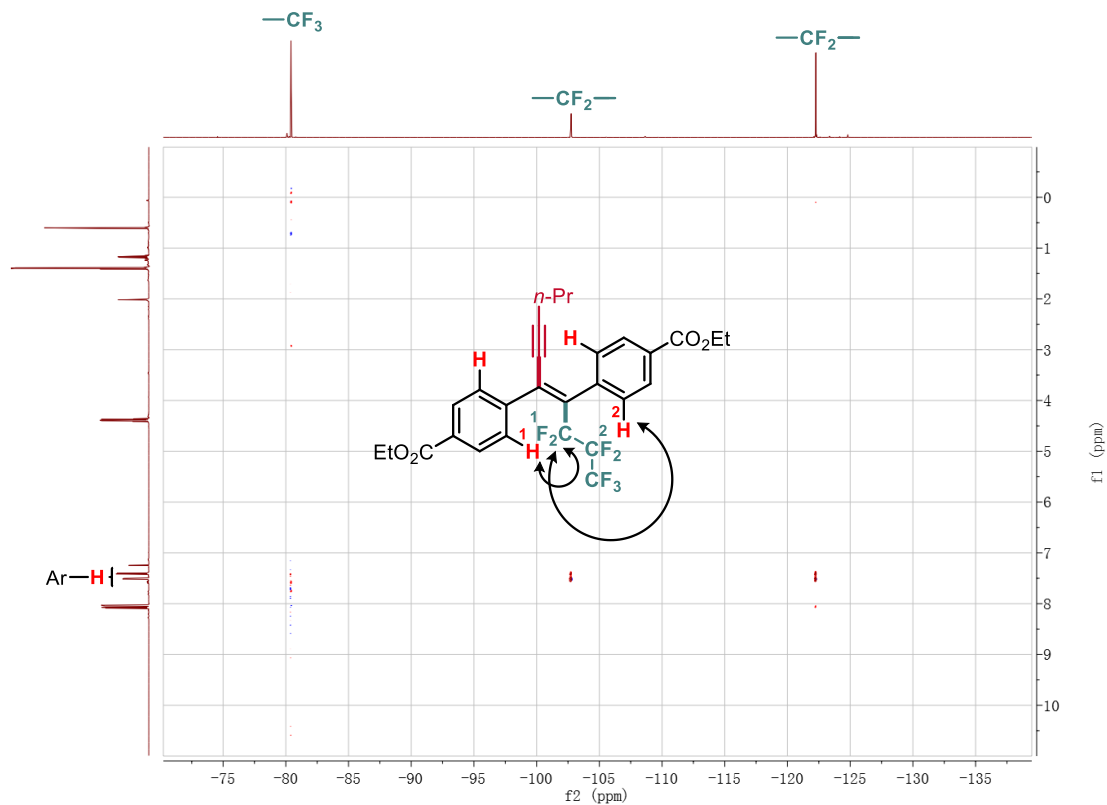

Chemical structure: CCOC(=O)c1ccc(cc1)/C(=C/c2ccc(cc2)C(=O)OCC)C(F)(F)CC(F)(F)C(F)(F)F

<sup>1</sup>H NMR spectrum (ppm):

- 8.02 (d, 2H, integration 4.00)
- 7.99 (d, 2H, integration 4.00)
- 7.43 (t, 2H, integration 4.00)
- 7.41 (t, 2H, integration 4.00)
- 7.19 (t, 2H, integration 4.00)
- 4.36 (q, 2H, integration 4.00)
- 4.34 (q, 2H, integration 4.00)
- 4.31 (q, 2H, integration 4.00)
- 4.29 (q, 2H, integration 4.00)
- 3.28 (s, 3H, integration 3.00)
- 1.35 (t, 3H, integration 6.00)
- 1.33 (t, 3H, integration 6.00)
- 1.31 (t, 3H, integration 6.00)
- 0.00 (TMS, 3H, integration 6.00)

**$^{19}\text{F}$  NMR Spectrum of Diethyl 4,4'-(4,4,5,5,6,6,7,7,7-nonafluoro-1-methoxy-1-oxohept-2-ene-2,3-diyl)(*E*)-dibenzoate 7**

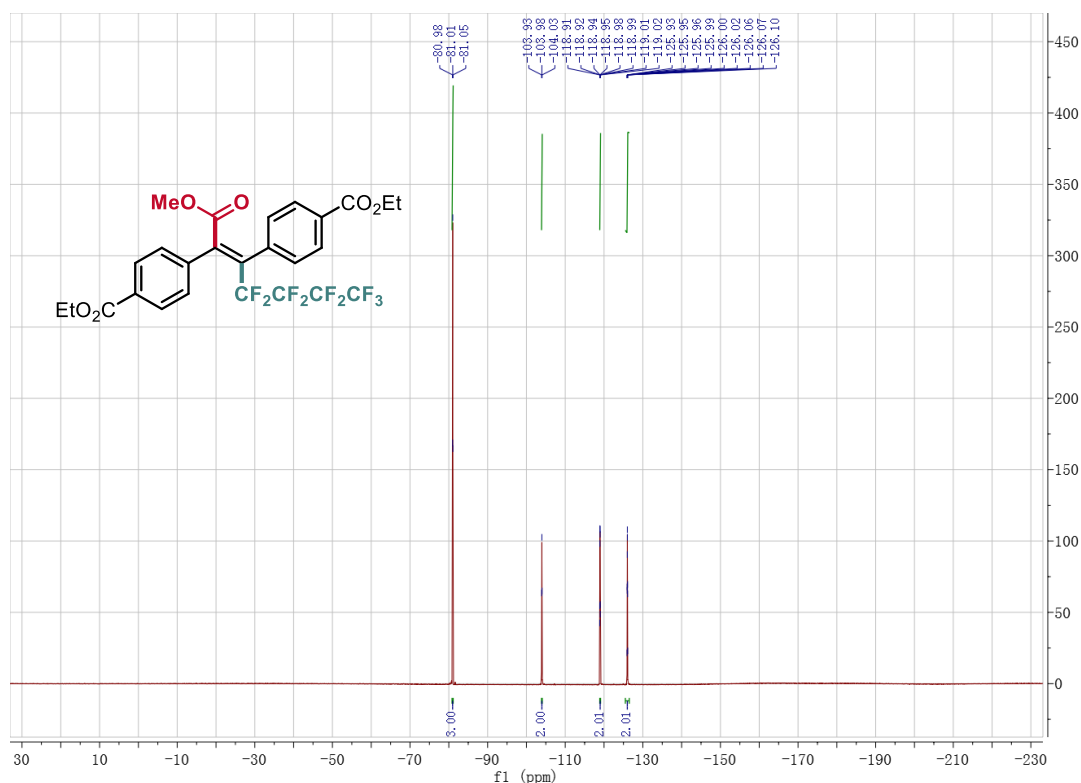

**$^{19}\text{F}$ - $^1\text{H}$  HOESY NMR Spectrum of Diethyl 4,4'-(4,4,5,5,6,6,7,7,7-nonafluoro-1-methoxy-1-oxohept-2-ene-2,3-diyl)(*E*)-dibenzoate 7**

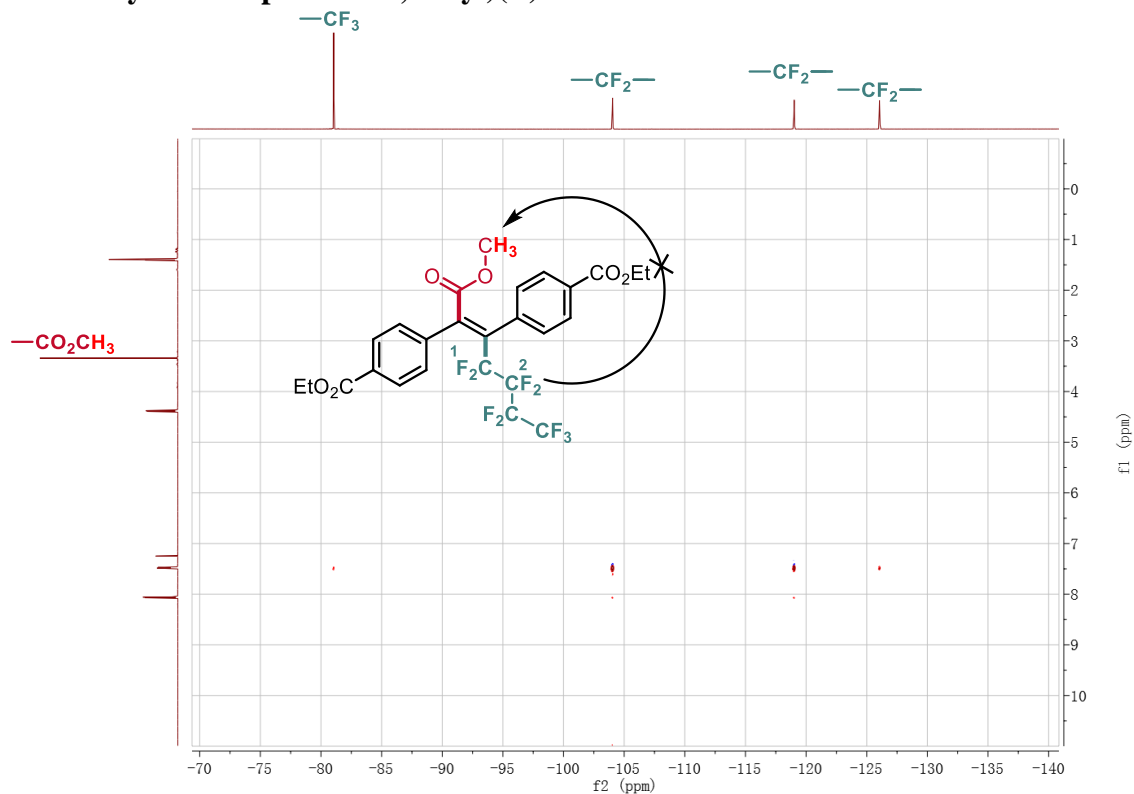

**<sup>1</sup>H NMR Spectrum of (*E*)-*N,N*-dimethyl-2-(4-(3,3,4,4,4-pentafluoro-1,2-diphenyl but-1-en-1-yl)phenoxy)ethan-1-amine 8**

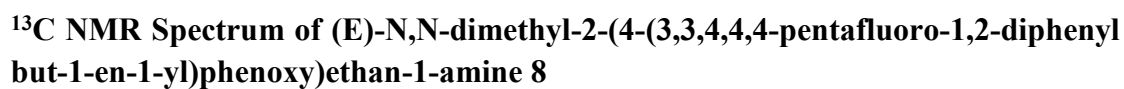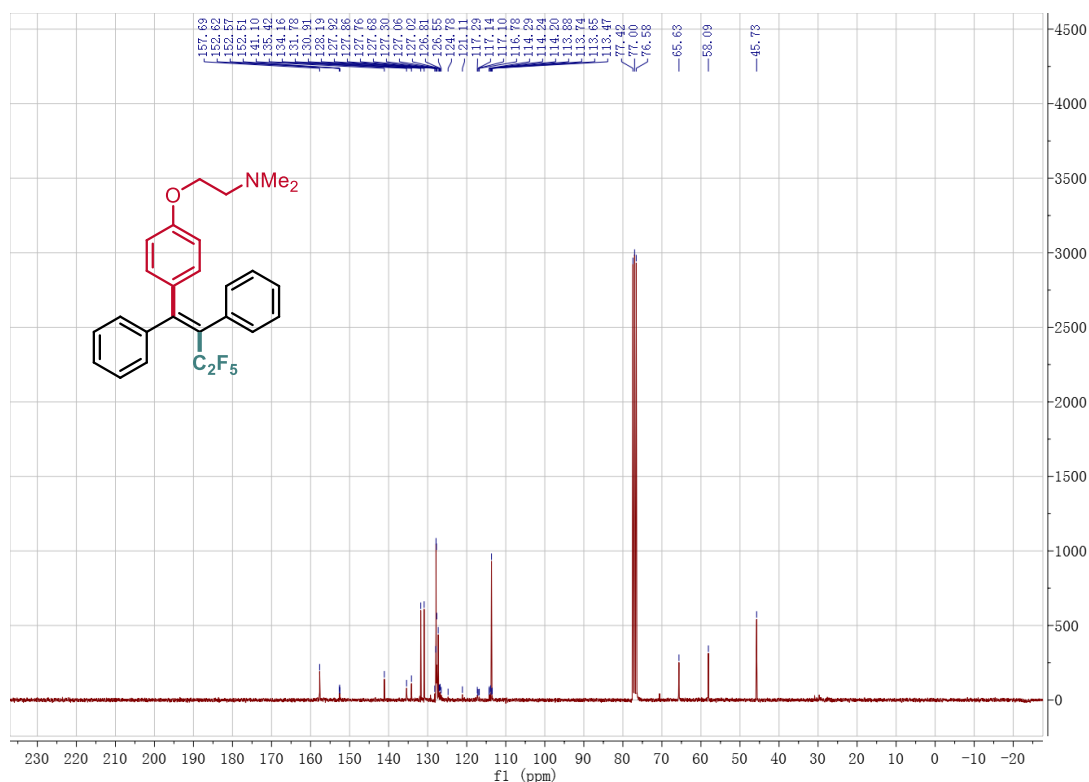

**<sup>19</sup>F NMR Spectrum of (E)-N,N-dimethyl-2-(4-(3,3,4,4,4-pentafluoro-1,2-diphenyl but-1-en-1-yl)phenoxy)ethan-1-amine 8**

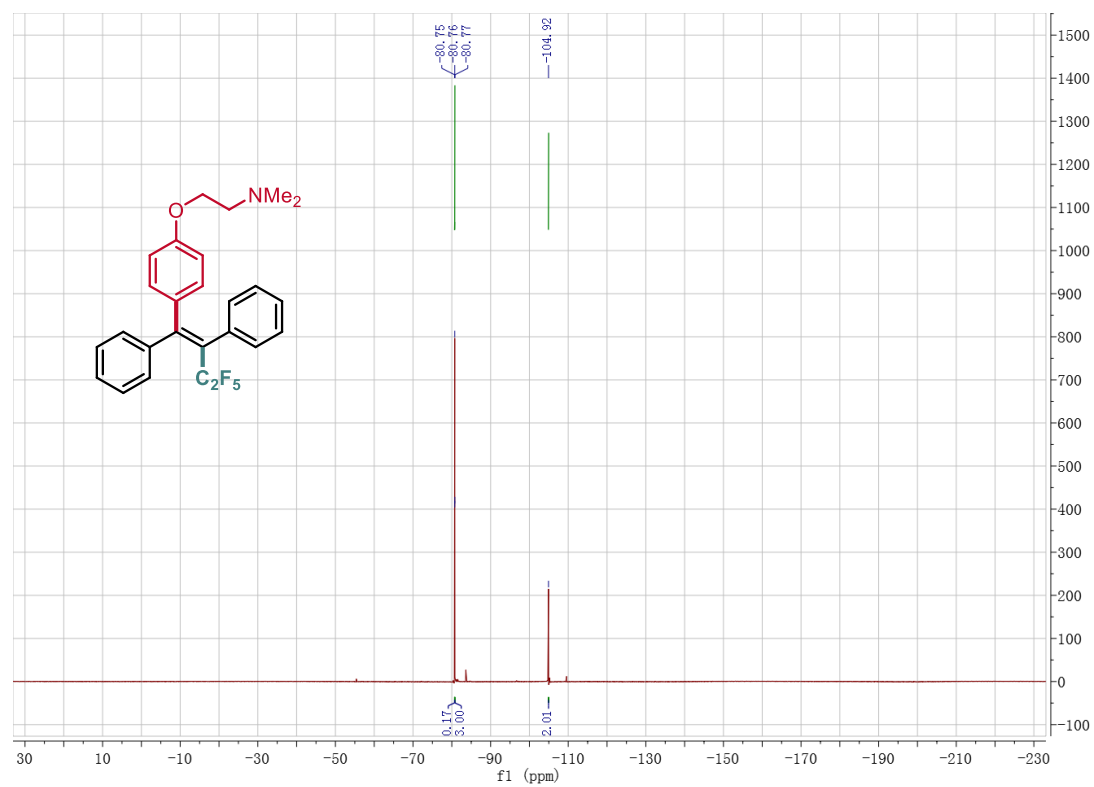

## 8. References

- [1] Umemoto, T.; Kuriu, Y.; Shuyama, H.; Miyano, O.; Nakayama, S.-I. *J. Fluorine. Chem.*, **1982**, *20*, 695–698.
- [2] Ichitsuka, T.; Fujita, T.; Ichikawa, J. *ACS Catal.* **2015**, *5*, 5947–5950.
- [3] Chu, Y.-T.; Chanda, K.; Lin, P.-H.; Huang, M. H. *Langmuir*, **2012**, *28*, 11258–11264.
- [4] Gallagher, W. P.; Maleczka, Jr. R. E. *J. Org. Chem.* **2003**, *68*, 6775–6779.
- [5] Wang, X.; Studer, A. *J. Am. Chem. Soc.* **2016**, *138*, 2977–2980.
- [6] Rakshit, S.; Patureau, F. W.; Glorius, F. *J. Am. Chem. Soc.* **2010**, *132*, 9585–9587.
- [7] Jiang, T.; Quan, X.; Zhu, C.; Andersson, P. G.; Bäckvall, J.-E. *Angew. Chem. Int. Ed.* **2016**, *55*, 5824–5828.
- [8] Flipo, M.; Charton, J.; Hocine, A.; Dassonneville, S.; Deprez, B.; Deprez-Poulain, R. *J. Med. Chem.* **2009**, *52*, 6790–6802.
- [9] Liu, J.; Xie, X.; Ma, S. *Synthesis* **2012**, *44*, 1569–1576.
- [10] Mo, F.; Lim, N.; Dong, G. *J. Am. Chem. Soc.* **2015**, *137*, 15518–15527.
- [11] Woźniak, Ł.; Staszewska-Krajewska, O.; Michalak, M. *Chem. Commun.* **2015**, *51*, 1933–1936.
- [12] Aakerçy, C. B.; Baldrighi, M.; Desper, J.; Metrangolo, P.; Resnati, G. *Chem. Eur. J.* **2013**, *19*, 16240–16247.
- [13] Liu, T.-F.; Feng, D.; Chen, Y.-P.; Zou, L.; Bosch, M.; Yuan, S.; Wei, Z.; Fordham, S.; Wang, K.; Zhou, H.-C.
- [14] Zhou, C.; Larock, R. C. *J. Org. Chem.* **2005**, *70*, 3765–3777.
